# Supplementary material for: Maternal mortality in Malawi, 1977–2012
Source: PubMed Central journal article supplement (PMC3884588; doi:10.1136/bmjopen-2013-004150), 2013-12-18
Supplement: bmjopen-2013-004150.draft_revisions.pdf [file bmjopen-2013-004150.draft_revisions.pdf]

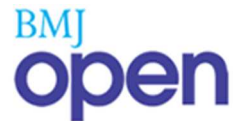

## Maternal Mortality in Malawi, 1977 to 2012

|                                 |                                                                                                                                                                                                                                                                                                                                                                                                                                                                                                                              |
|---------------------------------|------------------------------------------------------------------------------------------------------------------------------------------------------------------------------------------------------------------------------------------------------------------------------------------------------------------------------------------------------------------------------------------------------------------------------------------------------------------------------------------------------------------------------|
| Journal:                        | <i>BMJ Open</i>                                                                                                                                                                                                                                                                                                                                                                                                                                                                                                              |
| Manuscript ID:                  | bmjopen-2013-004150                                                                                                                                                                                                                                                                                                                                                                                                                                                                                                          |
| Article Type:                   | Research                                                                                                                                                                                                                                                                                                                                                                                                                                                                                                                     |
| Date Submitted by the Author:   | 01-Oct-2013                                                                                                                                                                                                                                                                                                                                                                                                                                                                                                                  |
| Complete List of Authors:       | Colbourn, Timothy; UCL Institute for Global Health, ; Parent and Child Health Initiative (PACHI),<br>Lewycka, Sonia; UCL Institute for Global Health,<br>Nambiar, Bejoy; UCL Institute for Global Health, ; Parent and Child Health Initiative (PACHI),<br>Anwar, Iqbal; icddr,b, Centre for Reproductive Health<br>Phoya, Ann; Government of the Republic of Malawi, Ministry of Health, Sector-Wide Approach (SWAp)<br>Mhango, Chisale; Government of the Republic of Malawi, Ministry of Health, Reproductive Health Unit |
| <b>Primary Subject Heading</b>: | Global health                                                                                                                                                                                                                                                                                                                                                                                                                                                                                                                |
| Secondary Subject Heading:      | Epidemiology, Obstetrics and gynaecology, Public health, Reproductive medicine, Health policy                                                                                                                                                                                                                                                                                                                                                                                                                                |
| Keywords:                       | maternal mortality, Malawi, trends, health systems, HIV                                                                                                                                                                                                                                                                                                                                                                                                                                                                      |
|                                 |                                                                                                                                                                                                                                                                                                                                                                                                                                                                                                                              |

SCHOLARONE™  
Manuscripts

only

# Maternal Mortality in Malawi, 1977 to 2012

Tim Colbourn<sup>a</sup>§, Sonia Lewycka<sup>a</sup>, Bejoy Nambiar<sup>a</sup>, Iqbal Anwar<sup>b</sup>, Ann Phoya<sup>c</sup>,  
Chisale Mhango<sup>d</sup>

<sup>a</sup>UCL Institute for Global Health, 30 Guilford Street, London, WC1N 1EH, UK

<sup>b</sup>icddr, <sup>b</sup> International Centre for Diarrhoeal Diseases Research, Bangladesh, Mohakhali, Dhaka 1212

<sup>c</sup>Government of the Republic of Malawi, Ministry of Health Sector-Wide Approach (SWAp)

<sup>d</sup>Director, Government of the Republic of Malawi, Ministry of Health Reproductive Health Unit, off Paul Kagame Road, Lilongwe, Malawi

§ corresponding author: [t.colbourn@ucl.ac.uk](mailto:t.colbourn@ucl.ac.uk)

## Abstract

### Background

Millennium Development Goal 5 (MDG 5) targets a 75% reduction in maternal mortality from 1990 to 2015, yet accurate information on trends in maternal mortality and what drives them is sparse. We aimed to fill this gap for Malawi, a country in sub-Saharan Africa with high maternal mortality.

### Methods

We reviewed the literature for population-based studies that provide estimates of the maternal mortality ratio (MMR) in Malawi, and for studies that list and justify variables potentially associated with trends in MMR. We used all population-based estimates of MMR representative of the whole of Malawi to construct a best-fit trend-line for the range of years with available data; calculated the proportion attributable to HIV, and qualitatively analysed trends and evidence related to other covariates to logically assess likely candidate drivers of the observed trend in MMR.

### Results

Fourteen suitable estimates of MMR were found, covering the years 1977-2010. The resulting best-fit line predicted MMR in Malawi to have increased from around 350 maternal deaths per 100,000 livebirths in 1980, to 700 in 1990, before peaking at around 1000 in 2000, and falling to around 850 in 2005 and below 500 in 2010. Concurrent deteriorations and improvements in HIV and health system investment and provision are the most plausible explanations for the trend. Female literacy and education, family planning, and poverty reduction could play more of a role if thresholds are passed in coming years.

### Conclusion

The decrease in MMR in Malawi is encouraging as it appears recent efforts to control HIV and improve the health system are bearing fruit. Sustained efforts to prevent and treat maternal complications are required if Malawi is to attain the MDG 5 target and save the lives of more of its mothers in years to come.

1  
2  
3 **Key Words:** Maternal Mortality, Malawi, Trends, Health systems, HIV  
4  
5  
6

7 **Strengths and Limitations of this study:**

- 8  
9  
10  
11  
12  
13  
14  
15  
16  
17  
18  
19  
20  
21  
22  
23  
24  
25  
26  
27  
28  
29  
30  
31  
32  
33  
34  
35  
36  
37  
38  
39  
40  
41  
42  
43  
44  
45  
46  
47  
48  
49  
50  
51  
52  
53  
54  
55  
56  
57  
58  
59  
60
- Provides most detailed review of trends in maternal mortality in Malawi to date, including estimation of trends in the maternal mortality rate, comparison with WHO and IHME estimates, and assessment of the variables most likely to have driven the trend
  - Includes quantitative estimation of the impact of HIV and antiretroviral treatment on maternal mortality in Malawi
  - Sparse data precluded the possibility of quantitatively modelling the relationships between potential explanatory variables and maternal mortality in Malawi
  - The study is comprehensive and conducted by researchers with extensive knowledge and experience of maternal health in Malawi; however, it is not a systematic review

## Background

Maternal mortality in Malawi is high, the most recent national survey estimate is 675 maternal deaths per 100,000 livebirths during the period 2004-2010 [1]. Millennium Development Goal (MDG) 5, aims to reduce maternal mortality by 75% between 1990 and 2015 [2]. This equates to a reduction from 620 maternal deaths per 100,000 livebirths in 1990 [3] to 155 by 2015. We review data on maternal mortality from population-based studies in Malawi, and explore trends and possible reasons behind them, in order to gauge progress towards achieving the MDG.

The maternal Mortality Ratio (MMR) is the most common measure of maternal mortality and is expressed as the number of maternal deaths per 100,000 livebirths, where a maternal death is defined as '*the death of a woman while pregnant or within 42 days of the termination of pregnancy, irrespective of the duration and the site of the pregnancy, from any cause related to or aggravated by the pregnancy or its management but not from accidental or incidental cause*' [4].

The leading biological causes of maternal death in Africa are haemorrhage, infections and hypertensive disorders [5], and these deaths are mediated by a complex set of underlying social, economic and behavioural factors, typically grouped into the Three Delays [6]. The delay by the patient in the decision to seek care, the delay in reaching the appropriate care once the decision has been made to seek care and the delay in receiving adequate care after arriving at the health facility, all contribute to maternal mortality. Dynamics in the drivers of these delays and in interventions to ameliorate them and treat the biological causes of maternal death they allow, all contribute to changing trends in maternal mortality [7].

## Methods

### *Review of MMR data in Malawi*

We searched for studies concerning maternal mortality in Malawi, primarily via PubMed and Google Scholar, but also including DHS reports and those from the UN and WHO.

Two of the data sources for maternal mortality estimates are from prospective population-based surveillance systems in the central region of Malawi. In both systems, community-based enumerators collected information about pregnancies, births and deaths, and deaths were followed up by verbal autopsies conducted by field supervisors. In MaiMwana project, in Mchinji district, the enumerators were paid staff who reported to field interviewers and supervisors who followed up with further post-partum interviews [8]. Data was included for control areas of the study (with no interventions), for the period 1<sup>st</sup> January 2005 to 31<sup>st</sup> January 2009 [9]. In MaiKhanda, in Lilongwe, Salima and Kasungu districts, the enumerators were volunteers who covered a smaller population each, and who reported to community health workers, officially referred to as Health Surveillance Assistants (HSA). Given the lack of an observed effect of the MaiKhanda interventions on maternal mortality data was included for all areas, for the period 1<sup>st</sup> July 2007 to 31<sup>st</sup> December 2010 [10].

Not all of the published studies reported 95% confidence intervals for their estimates, so these were calculated using the Newcombe-Wilson method without continuity correction [11]. Data from the 1992 DHS were re-analysed in a study by ORC Macro [12].

1  
2  
3 We estimate the trend in the MMR in Malawi from 1977 to 2010 using the best-fit multi-  
4 term fractional polynomial transformation based on the available population-level data  
5 representing the whole country, using the **fracpoly** command in Stata 13.0 for Mac.  
6 Further details are provided in Web Appendix 1. We compare this trend to that estimated  
7 by recent modelling studies.  
8

### 9 10 ***Review of drivers of MMR in Malawi***

11 A list of possible variables that could have impacted on MMR in Malawi was drawn up  
12 using results from modelling studies [13 p85 14-16] and relevant overviews [7 17 18].  
13 Literature and internet-based databases were used to obtain data on the levels of each of  
14 the relevant variables in Malawi over the last 35 years. Identified variables were:  
15 percentage of deliveries attended by skilled personnel, percentage of deliveries by C-  
16 Section, Total Fertility Rate (TFR), GNI per capita, health expenditure per capita, life  
17 expectancy at birth, female illiteracy rate, HIV prevalence and access to antiretroviral  
18 therapy, political stability, malaria, malnutrition, and variables associated with the  
19 accuracy of MMR data collection. The trends in these variables and in intermediate  
20 variables concerned with their mechanisms of action were then compared to the trends in  
21 MMR in order to qualitatively and logically assess whether they might have contributed  
22 to changes in MMR in Malawi. Bivariate and multivariate linear regressions were run, but  
23 a lack of data points reduced the power of these models to detect significant associations,  
24 especially non-linear associations and interaction terms -both of which are likely given the  
25 complex nature of potential causal pathways between the variables and MMR-, therefore  
26 these results are not included. The lack of data points also precluded the use of multiple  
27 imputation to estimate MMR and the effects of the potential predictor variables for the  
28 years with missing data.  
29  
30  
31

32 We used the relative-risk of pregnancy-related mortality in HIV positive compared to HIV  
33 negative women estimated by Calvert and Ronsmans via systematic review and meta-  
34 analysis to be 7.74 [19], to estimate the proportion of the MMR that is due to HIV  
35 depending on the HIV prevalence. We adjusted this proportion downwards from 2003 to  
36 account for the increasing impact of the antiretroviral therapy (ART) programme in  
37 Malawi [20 21]. Further details are provided in Web Appendix 2.  
38  
39  
40

## 41 **Results**

### 42 ***Studies of Population MMR in Malawi***

43 Eleven studies reporting population-based estimates of MMR were found, and one study  
44 contributed four separate estimates [3 22] (Table 1).  
45  
46  
47

### 48 ***Trend in national population-based estimates of MMR***

49 Figure 1 plots the MMR of the 8 analyses, each applying to a pre-survey time period of a  
50 number of years, from the 5 surveys representative of the whole of Malawi (the four DHS  
51 surveys and the MICS survey) and the other surveys representative of specific regions of  
52 Malawi (Table 1). It appears that from a low of around 400 in the early 1980s the MMR  
53 rose rapidly throughout the 1980s and early to mid-1990s to a peak of over 1000 maternal  
54 deaths per 100,000 livebirths around 1997. The MMR then fell to around 800 by 2003 and  
55 to an estimated 675 in 2007 [1].  
56  
57  
58  
59  
60

1  
2  
3  
4  
5  
6  
7  
8  
9  
10  
11  
12  
13  
14  
15  
16  
17  
18  
19  
20  
21  
22  
23  
24  
25  
26  
27  
28  
29  
30  
31  
32  
33  
34  
35  
36  
37  
38  
39  
40  
41  
42  
43  
44  
45  
46  
47  
48  
49  
50  
51  
52  
53  
54  
55  
56  
57  
58  
59  
60

Figure 1 plots locally-weighted (Lowess) regression trends for the estimates and 95%CI of the national-level surveys in black. The best-fit fractional polynomial transformation is plotted in gold, details of its calculation are provided in Web Appendix 1. A comparison of this best-fit trend line and recent modelling studies is provided in Table 2. The WHO estimates of MMR for Malawi, developed by the Maternal Mortality Estimation Inter-Agency Group (MMEIG) [15] are based on a model fitted for all countries of the world and therefore may not accurately convey country-specific nuances. This seems very likely for Malawi as the higher 1990 figure and steady decline (Table 2) seems to ignore the evidence suggesting a rise in the 1990s followed by a fall in the 2000s (Figure 1). Despite also being generalised to many countries, a different model developed by the Institute for Health Metrics and Evaluation (IHME) does capture this rise and fall [16], although they estimate a much higher peak around the year 2000 than our estimate (Table 2).

### ***Trend in estimates of MMR in Central Region of Malawi***

Data from prospective surveillance of populations in Mchinji (MaiMwana) and Salima, Lilongwe and Kasungu (MaiKhanda) give MMRs of 585 for MaiMwana during 2005-8 and 299 for MaiKhanda during 2007-10 (Table 1; Figure 1). These numbers are lower than the most recent national estimates from DHS and MICS reports. This may reflect lower MMR in the Central Region of Malawi, which was estimated to be 678, compared to the national estimate of 807 in the MICS report, during 2000-6 (Table 1). Although this difference is not statistically significant (the 95% confidence intervals overlap), the 2006 MICS reports the Central and Northern regions of Malawi to have significantly lower MMR than the Southern region [23] (Table 1). Comparison of DHS data by region was not possible because the place of exposure and death of the respondents' sisters who died is not recorded [24].

### ***Variables linked to changes in MMR***

Figure 2 conceptualises potential drivers of maternal mortality in Malawi. These linkages, and the evidence supporting them, are described below. Table 3 accompanies this analysis by examining how trends in each of the explanatory variables relate to the estimated trend of maternal mortality.

### **Skilled Birth Attendance, Caesarean Section and Emergency Obstetric Care**

The proportion of women attended by a skilled health professional at delivery has changed very little over the majority of the period in question, so is unlikely to have contributed to the observed changes in MMR. Similarly, although deliveries attended by traditional birth attendants have increased, this is largely due to a decrease in the proportion of deliveries attended by relatives or no one at all (Table 3). The DHS 2010 results [1] show that skilled birth attendance increased to 71% in the 6 years to 2010 however, whilst MMR fell to 675. This is encouraging, however further declines in maternal mortality could perhaps be possible if it were not for the overcrowding of facilities and the fact that human and material resources for health have not kept pace with the recent rapid rise in women delivering at facilities [25].

The lack of association of SBA with MMR questions the validity of the indicator 'delivery by a skilled birth attendant' as a proxy for MMR, especially on consideration that many Asian countries have achieved a lower MMR with much lower skilled attendance at birth e.g., Bangladesh [26 27] and Nepal [28 29]. It is also possible that both the actual level of skills and knowledge of the attendants and the ability of the surrounding environment (e.g. drugs and supplies) to ensure the possibility of truly skilled attendance including provision of basic and comprehensive emergency obstetric care has



1  
2 altered significantly over the period in question [30]. However, there is insufficient data to  
3 determine whether such changes took place in Malawi. In addition, there has been no  
4 adequate verification of the reporting of attendance by nurses, midwives and doctors  
5 (taken by the DHS to be 'skilled attendance') by the women surveyed to arrive at these  
6 statistics [30 31].  
7

8  
9 Remaining below the WHO recommended minimum level of 5%, the Caesarean Section  
10 rate in Malawi has been consistently low throughout the last 20 years (Table 3). It is  
11 therefore unlikely to be associated with the observed trends in MMR. It is also important  
12 to note that we are unaware of the indications of these C-sections and in particular  
13 whether they were undertaken for live-saving purposes. When the population based C-  
14 section rate is low it should, however, be done to save women's lives [32]. Health facility  
15 delivery is high in Malawi but, according to the latest national assessment, 39% of facility  
16 deliveries take place in health centres, which are poorly resourced, whilst 61% take place  
17 in hospitals; and the referrals of complicated cases either from home or from health  
18 centres to hospitals where blood and surgery is available is not always efficient [33]. Most  
19 C-sections in Malawi are performed by clinical officers, not by obstetricians or doctors.  
20 However, studies have revealed that clinical officers are comfortable [34] and competent  
21 [35 36] performing such operations.  
22  
23

### 24 25 26 **Fertility and Family planning**

27 The Total Fertility Rate (TFR) may have an impact on maternal mortality, as women of  
28 high parity are at increased risk of potentially fatal maternal complications [37] and the  
29 lifetime risk of maternal death increases with the greater the number of times a woman is  
30 exposed to pregnancy and childbirth. However, from 1982 to 2003 the TFR has changed  
31 little in comparison to the change in MMR and in fact even dropped slightly in the 1980s  
32 and 1990s while the MMR was increasing (Table 3), therefore it is unlikely to be related  
33 to the observed trend in MMR in Malawi. The slight reduction in TFR has not impacted  
34 on the rate of population growth in Malawi, which contributes to overburdening the health  
35 system.  
36

37  
38 Family planning methods, if accepted by a large proportion of the population, and if used  
39 continuously over prolonged periods, reduce fertility rates and consequent maternal  
40 deaths and thus contribute to reducing MMR. Family planning reduces MMR by reducing  
41 the total number of pregnancies (parity) as well as the number of unintended, unwanted  
42 and untimely pregnancies, which are often high risk [38]. Reducing unwanted pregnancies  
43 will reduce induced abortions. Abortions are estimated to be the cause of between 5% and  
44 18% of maternal deaths according to a range of primarily hospital-based studies assessed  
45 by Bowie and Geubbels [7]. Safe abortion in Malawi is only permitted where the life of  
46 the mother is threatened; such restrictive abortion laws have not been shown to reduce  
47 maternal mortality anywhere. Success in family planning also brings about a shift in risk  
48 groups from high parity to low parity and from older age to younger age [37] but the  
49 impact of this shift on the MMR is possibly small [39].  
50  
51

52 Although the contraceptive prevalence rate has increased over the last 20 years, this has  
53 not resulted in large changes in total fertility. Maternal mortality increased during the  
54 period of increasing contraceptive use, so they are unlikely to be related. However, it's  
55 possible that sustained gains in contraception use during the last decade, when HIV was  
56 less of a contributor to MMR (Figure 1), could have reduced MMR.  
57  
58  
59  
60

### **Gross National Income per capita**

GNI per capita is consistently very low throughout the whole period and is unlikely to have contributed to significant improvements in maternal health. Given the history of maternal mortality in industrialised countries in the first half of the twentieth century it is also unlikely that recent increase in GNI will have contributed to the recent reduction in MMR, unless it led to improvements in the empowerment of women to make decisions, transport, and the availability of high-quality obstetric care [6 7].

### **Health expenditure**

The trend in MMR may be related to the trend in health expenditure (Table 3). Due to an economic slump in 1994/95 government health spending was reduced, and although cushioned by increases in donor funding, still dropped from 45.1MKW per capita in 1994 to 40.9MKW per capita in 1998 [40] at a time when the MMR was increasing rapidly. Also, both total (government, private and individual) and government per capita health expenditure has increased in recent years, whilst the MMR has gone down.

### **Female Literacy and Education**

Female literacy is an indicator of formal education, and is known to be associated with lower MMR through increased knowledge of family planning and lower fertility, and increased knowledge of danger signs of pregnancy and the importance of skilled delivery [40]. At 79.7%, female literacy is higher in the Northern region of Malawi, than either the Central region (64.5%) or the Southern region (67.5%) [1]. Despite maternity services being more sparsely distributed and under more hostile terrain the MMR is lower in northern Malawi [23], perhaps due to the higher female literacy. For the country as a whole, there have been recent gains in adult female literacy and similar gains in the percentage of females going to secondary school (Table 3), which may be related to recent declines in MMR. However, the increasing maternal mortality in the 1990s was not mirrored by declining female literacy, and the effect of literacy on MMR may follow a significant time lag – enough for other changes intermediate to reduced MMR to manifest. Such results of improved female education could include changes in family and community dynamics that give women increased agency and control over their lives [41].

It may also be that there is a threshold level of female literacy that has to be surpassed in order for it to translate as reductions in maternal mortality via the catalysis of improved knowledge of pregnancy danger signs and the importance of skilled attendance at delivery. Above such a threshold a critical mass of knowledge may be reached within the poor communities of Malawi that contribute the most towards its high MMR.

### **Female Life Expectancy at birth**

Life expectancy at birth is an accurate proxy measure of the overall health of the population and therefore could also be an accurate predictor of maternal mortality [13]. From the available data the slight fall in female life expectancy during the 1980s and 1990s does match the rise in MMR during the same period and the rise in life expectancy in the early 2000s also matches the fall in MMR during this time, however the trends in life expectancy are less marked (Table 3). In Malawi, life expectancy is dependent on a number of factors such as HIV and other diseases that are also linked to MMR.

### **Adult Female Mortality**

Adult Female Mortality (AFM) follows the same trend as MMR. This is not surprising considering that MMR is a subset of AFM as determined by the sisterhood method used in the DHS and MICS. Given that AFM is around 5 times higher than MMR there is a large scope for the MMR to be inflated by misclassification of non-maternal adult female



1  
2  
3  
4  
5  
6  
7  
8  
9  
10  
11  
12  
13  
14  
15  
16  
17  
18  
19  
20  
21  
22  
23  
24  
25  
26  
27  
28  
29  
30  
31  
32  
33  
34  
35  
36  
37  
38  
39  
40  
41  
42  
43  
44  
45  
46  
47  
48  
49  
50  
51  
52  
53  
54  
55  
56  
57  
58  
59  
60

deaths as maternal. Sisterhood methods estimate ‘pregnancy-related’ deaths during pregnancy and up to two months post-partum, irrespective of the cause. In Bolivia, where AFM was around 11 per 1000 person-years between 1975-1988, the number of non-maternal deaths included in MMR estimates using sisterhood methods was over 30% [42]. With a high prevalence of HIV and similar estimates of AFM in Malawi in 1997 and 2001, the proportion of non-maternal deaths included in maternal mortality estimates may be similar. However, the proportion of pregnancy-related deaths in HIV positive women that are incidental deaths and the remaining proportion that are indirect maternal deaths remains unknown [15]. Failure to differentiate between maternal and non-maternal deaths may lead to inaccurate conclusions about trends and impact of public health interventions, as well as inadequate future interventions [43]. Disregarding potential misclassification bias, the DHS figures show MMR to have declined by an estimated 31% (from 984 to 675 maternal deaths per 100,000 livebirths) and AFM to have declined by an estimated 28% (from 11.6 to 8.4 deaths per 1000 women aged 15-49) between the 2004 survey and the 2010 survey [14]. Although the MMR decline appears slightly larger, suggesting a reduction in direct obstetric maternal deaths in addition to a reduction in HIV/AIDS-related maternal deaths (see below), given wide confidence intervals, we are not able to conclude that this was the case.

### HIV, AIDS and ART

Figure 1 shows that the estimated MMR due to HIV rises dramatically during the 1990s both in absolute terms and as a proportion of the total MMR as the HIV prevalence rises (Table 3). As the HIV prevalence levels off around the year 2000 and begins to slowly decline (Table 3) and incidence also declines [45], the proportion of MMR due to HIV slowly declines, declining more rapidly towards 2010 as the effect of the antiretroviral therapy programme takes hold [20-21]. The following paragraphs discuss the relationship between HIV and MMR in Malawi with reference to how it was calculated, biological plausibility and cause-specific mortality, regional variations, and the recent effect of the antiretroviral therapy programme.

The trend in MMR due to HIV depends on the HIV prevalence, the relative-risk (RR) of pregnancy-related mortality in HIV+ mothers compared to HIV- mothers [19] and impact of ART from 2004 onwards [20-47]. Further detail and explanation of the calculations involved are provided in Web Appendix 2. Although the RR of 7.74 is from a systematic-review and meta-analysis of 23 studies that were mainly facility-based [19], it is corroborated by a secondary analysis of population-based longitudinal cohort data from sub-Saharan Africa that estimates it to be 8.2 [48]. The fact the RR is for pregnancy-related mortality rather than maternal mortality is less of an issue given that the DHS and MICS estimates used to construct the trend line to which the RR is applied effectively measure pregnancy-related rather than maternal mortality. This also negates the issue of maternal deaths due to HIV not being formally recorded pre-2010, before the importance of HIV as an indirect cause of maternal death was recognised by the creation of ICD10 code O98.7 [4]. The estimated proportion of MMR attributable to HIV takes no account of the effect of the HIV epidemic on the health system of Malawi, however, which includes exacerbation of the human resource crisis [49], and possibly also de-prioritisation of other health problems such as maternal health. Therefore it is likely to be an underestimate.

Although HIV reduces the rate of conception resulting in fewer pregnancies, it is likely to increase maternal mortality due to a combination of: increases in direct obstetric deaths (due to increases in puerperal sepsis for example); increases in indirect obstetric deaths (due to complications of HIV aggravated by pregnancy); and, decreases in the quality of

1  
2 care available to all mothers as a result of less trained health workers being available at  
3 health facilities (as many die from AIDS) and a more prejudicial attitude of health  
4 workers towards those who they suspect of having HIV [50].  
5

6  
7 If HIV were responsible for an increase in maternal deaths we would expect cause-  
8 specific mortality rates to reflect this. While few studies have had the capacity to verify  
9 maternal HIV status, the proportion of deaths due to infections such as puerperal sepsis  
10 and malaria may be related to HIV. Hospital-based studies have shown an increase in the  
11 proportion of maternal deaths due to puerperal sepsis from 6/78 (8%) in 1989 and 13/37  
12 (18%) in 1990 [51] to 29% in 2005 [52]; both studies also finding HIV/AIDS (11% and  
13 10% of maternal deaths in 1989 and 1990 respectively [51], percentage not stated in 2005  
14 study) and other infections to be important contributors. A review of 43 maternal deaths  
15 in hospitals in the central region in 2007 showed 16% were due to sepsis and attributed a  
16 further 16% to AIDS [53]. A recent study of 61 maternal deaths in a central region  
17 hospital during 2007-2011 found 12 (20%) were HIV positive, 10 of whom died of non-  
18 pregnancy-related infections including meningitis and pneumonia [54]. Another recent  
19 study of 32 maternal deaths in a tertiary hospital in Malawi in 2011 found 13 (40%) of the  
20 women were HIV positive, 9 HIV negative and 10 with unknown HIV status; and  
21 classified 6 (19%) of the maternal deaths as due to sepsis and a further 3 (9%) due to  
22 HIV-related disease [55]. HIV infection may also predispose pregnant women to more  
23 severe malarial morbidity, but data related to trends in malaria-related maternal  
24 complications are limited.  
25  
26

27  
28 As noted earlier, the MMR in the Northern and Central Regions of Malawi was  
29 significantly lower than that in the Southern Region of Malawi between 2000-6 [23]. In  
30 2004, HIV prevalence was also significantly lower in these regions, with 10.4% (95%CI:  
31 7.8%, 13.8%), 6.6% (5.2%, 8.3%) and 19.8% (17.7%, 22.1%) in Northern, Central and  
32 Southern Regions respectively [44]. The trend in the MMR in urban and rural areas of  
33 Malawi between the first DHS survey (1986-1992) and the second DHS survey (1994-  
34 2000) was examined by Bicego and colleagues [56]. They found that the increases in  
35 MMR were statistically significant and concluded that they were related to increases in  
36 HIV during the same period.  
37  
38

39 There is now growing evidence from Malawi and elsewhere in sub-Saharan Africa that  
40 the population-level effect of ART is significant in reducing adult mortality rates [46].  
41 The Malawian government Ministry of Health launched a national program providing free  
42 access to ART in 2004. By mid-2010, 359,771 people had been registered on ART,  
43 345,765 in the public sector [47], and there had been a rapid fall in mortality [20].  
44 Therefore part of the reason for the decline in MMR in Malawi after 2003 may have been  
45 the successful scaling-up of the ART program and a consequent reduction in direct and  
46 indirect maternal deaths related to HIV and AIDS. However, the main impact of ART is  
47 likely to have occurred later as it's roll-out only became significant from 2005, with  
48 coverage reaching 25-50% by 2007-2009 [45]. Although, as detailed in Web Appendix 2,  
49 the proportion of HIV positive women on ART needs to increase from the 35% observed  
50 in 2010 [57] for there to be more of an impact. Recent reports show a large increase to  
51 69% in the last quarter of 2012 however [58], and the adoption of 'Option B+' of treating  
52 all HIV positive pregnant women with antiretrovirals for life since 2011 shows great  
53 promise [21].  
54  
55

### 56 **Malaria and Anaemia**

57 Malaria in pregnancy has been linked to low birth weight and adverse outcomes for the  
58 baby and severe antenatal anaemia in the mother, and anti-malarial prophylaxis is  
59  
60

1  
2 recommended, especially for low parity women [7]. Facility-based studies in Malawi have  
3 estimated anaemia to cause 7% of 43 maternal deaths [53], 12% of 165 maternal deaths  
4 [25]<sup>p140</sup>, 16% of 32 maternal deaths [55] and 17% of 61 maternal deaths [54]. However,  
5 although studies in other malaria endemic countries have linked seasonal trends in  
6 maternal mortality to seasonal trends in malaria incidence [59 60], and a recent study in  
7 Kenya estimated 9% of 249 pregnancy-related deaths were due to malaria [61], the  
8 contribution of malaria to maternal mortality in Malawi remains unclear. Malaria control  
9 measures have increased in Malawi during the last decade of unchanged malaria  
10 transmission but have yet to reduce hospital admissions due to malaria in children [62 63].  
11 Current prophylaxis measures in pregnant women in Malawi may be insufficient too [64],  
12 suggesting the observed trend in maternal mortality in Malawi is unlikely to be due to  
13 changes in malaria or its prevention or treatment.  
14  
15

### 16 17 **Nutrition and stunting**

18 Under-nutrition during childhood and adolescence leads to stunting which puts women at  
19 risk of prolonged and obstructed labour and consequent ruptured uterus and haemorrhage,  
20 important causes of maternal mortality in Malawi [7]. The proportion of maternal deaths  
21 due to stunting remains unclear, however. Therefore the extent to which longitudinal  
22 improvements in nutritional status could reduce maternal mortality is unknown. Given the  
23 proportion of women with short stature has changed little (Table 3), stunting is unlikely to  
24 have played a major role in the observed rise and fall in MMR in Malawi.  
25  
26  
27

## 28 **Discussion**

29  
30 National estimates of maternal mortality in Malawi show a rising trend throughout the  
31 1980s and 1990s reaching a peak in the late 1990s from which it started to decline.  
32 Maternal mortality is difficult to measure accurately, and therefore the trends observed  
33 must be interpreted with caution. However, some measure of change is necessary for  
34 monitoring progress towards achieving the MDG for maternal health. Understanding what  
35 has contributed to the rise and fall of maternal mortality is also crucial. We hope this  
36 paper goes some way towards explaining both for the case of Malawi.  
37  
38

### 39 ***Why is the Maternal Mortality Ratio falling?***

40 A paper by Muula and Phiri seeking to explain the rise in MMR between the 1992 and  
41 2000 DHS speculated that deterioration in health services resulting from the rise in HIV  
42 during this period (and the rise in HIV itself) were possibly to blame for the apparent 80%  
43 increase in MMR during this period [65]. The evidence we present in this paper suggests  
44 that the declining impact of HIV in Malawi may have contributed to the recent fall in  
45 maternal mortality. Muula and Phiri also speculated that an increase in poverty during the  
46 1990s could have contributed to an increase in MMR [65]. Malawi's economy has been  
47 more successful in recent years (Table 3) and poverty has perhaps decreased as a result  
48 [66]. Thus recent declines in maternal mortality could be related in part, to poverty  
49 reduction. However, the level of economic improvement required to drive a reduction in  
50 maternal mortality in Malawi remains unclear.  
51  
52

53  
54 The functioning of the health system is key. Although the proportion of women whose  
55 delivery was attended by a skilled health-worker has only changed in recent years, the  
56 competency of the health system may have changed throughout the last three decades. An  
57 audit of maternal deaths in the Southern Region concluded that the quality of obstetric  
58 care went down in Malawi in the 1990s [67] and in general it is perceived that the health  
59  
60

1  
2 system deteriorated significantly during the 1990s. Reasons for this decline in quality  
3 included: the human resources crisis - overseas migration of nurses and midwives peaked  
4 in the late 1990s, internal rural to urban migration and HIV were also responsible for  
5 declining numbers of key obstetric health workers [49]; a closure of rural facilities – some  
6 of which have since reopened following the 2004-2010 emergency human resources plan,  
7 although the Hardship Allowance for attracting staff to rural areas was not implemented  
8 [68]; declining standards in schools resulting in insufficient candidates to fill nursing and  
9 medical schools; and, a lack of capable, efficient and un-corrupt leadership/strategic  
10 planning [40]. Some of these factors have improved in the last decade and could therefore  
11 be responsible for the turnaround in MMR. Other improvements were also made since the  
12 launch of the Safe Motherhood programme in the southern region in 1997 including more  
13 health education talks and information on safe motherhood [69], and initiatives to quicken  
14 referrals from rural health centres to hospitals [70 71].  
15  
16

17  
18 The Sector Wide Approach (SWAp) of 2004-2010, and increased per capita health  
19 funding (Table 3), has enabled increased coordination, investment, and provision of  
20 essential healthcare [72], including some increases in nursing and other staff resulting  
21 from the Emergency Human Resources Plan [68]. However, provision of maternity care  
22 was still less than half of what was required [72] and additional recent data suggests  
23 obstetric care services are still lacking in Malawi, especially at the peripheral health centre  
24 level ([33 73]), and shortages of staff and supplies are still acute [74]. The MMR would  
25 decline further if access to both basic and comprehensive emergency obstetric care could  
26 be improved further along with skilled attendance for all deliveries [33]. Clearly there is  
27 much still to do; but not just for poor rural women.  
28  
29

### 30 ***Urban, rural, richer, poorer***

31 The lower recent estimates from the MaiMwana and MaiKhanda population-based  
32 surveillance may also be partly due to the exclusion of urban populations in these studies  
33 [9 10]. Most health indicators in Malawi are better in urban areas [1 23 44], but MICS  
34 reports slightly higher MMR in urban than in rural areas (Table 1). This may be partly due  
35 to higher HIV prevalence in urban areas [75], and partly due to the loss of ‘urban  
36 advantage’ in maternal health now arising in urban populations in developing countries  
37 [76], although a lack of access to skilled delivery in rural areas would be expected to  
38 counterbalance the lower HIV-related maternal mortality. A flattening of the  
39 socioeconomic gradient for maternal and child mortality has been seen in Malawi and  
40 other countries with high HIV prevalence, with higher mortality in low socioeconomic  
41 groups due to lack of access to health care and higher mortality in high socioeconomic  
42 groups due to HIV [77 78].  
43  
44

### 45 ***Policy Implications: Reaching MDG5 in Malawi***

46 Assuming the MMR in 1990 was 620 (95% CI 410-830) [3], then the MDG 5 targeted  
47 75% reduction for Malawi would mean an MMR of 155 (103-208) by 2015 [2 79].  
48 Alternatively, using the time trend analysis from this paper (Figure 1), MMR for 1990  
49 was approximately 750 (95% CI 550-950) corresponding to an MDG 5 target of 190 (95%  
50 CI: 140-240) by 2015. Despite these uncertainties as to what the MDG 5 target should be  
51 (the Countdown 2012 report sets the target for Malawi at 280 [80], basing it on the 1990  
52 estimate of 1100, which we dispute), it is clear that meeting the target will be difficult. It  
53 is often easier to reduce mortality from a high level to a less high level than from a low  
54 level to an even lower level. Meeting MDG5 in Malawi will also be difficult because of  
55 the rapid increase in MMR during the 1990s, possibly as a result of HIV. Both prevention  
56 and treatment of HIV are therefore also priorities in the fight against maternal mortality  
57 [81] and it is good to know that progress is now being made on both fronts [58]. If many  
58  
59  
60



1  
2 of the extra deaths in the 1990s were incidental HIV deaths rather than maternal deaths,  
3 greater reductions in direct obstetric maternal deaths are crucial for attaining the 75%  
4 reduction. Translating the recent increase in institutional delivery in Malawi into  
5 increased quality of routine and emergency care during and after delivery must be  
6 prioritised as part of continued efforts towards the strengthening of the health system in  
7 Malawi [25 33]. Prevention of maternal deaths through an increased focus on family  
8 planning and liberalising safe abortion services, and improving the timeliness of referrals  
9 from homes and health centres should also be priorities [27].  
10  
11  
12  
13  
14  
15  
16

## 17 **Conclusion**

18 From the best available evidence it appears that fewer mothers are dying in pregnancy,  
19 childbirth and the post-partum period in Malawi in recent years and that this is possibly  
20 the result of: increases in health facility delivery; improvements in the financing and  
21 management of the health system contributing to real gains in skilled delivery (in terms of  
22 the knowledge and skill of the increasingly available professionals involved and an  
23 enabling environment); improvements in awareness of women of danger signs of  
24 pregnancy, catalysed through increased adult female literacy in recent years; and, more  
25 recently, a reduction of HIV-related maternal mortality via a rapid roll-out of  
26 antiretroviral therapy. Despite this it must be stressed that at around 400 maternal deaths  
27 per 100,000 livebirths the MMR in Malawi is still unacceptably high and much remains to  
28 be done to prevent maternal complications arising and improve the provision of obstetric  
29 care in the country. Considerable effort is required if Malawi is to achieve MDG 5 by  
30 having an MMR of 150 or less by the end of 2015 and if more mothers are going to  
31 survive in the coming years.  
32  
33  
34  
35

## 36 **Funding**

37 This research received no specific grant from any funding agency in the public, commercial or not-for-profit  
38 sectors. TC and BN were funded by The Health Foundation from 2007 to 2011, and funded by the European  
39 Union, Bill and Melinda Gates Foundation, UK government Department for International Development  
40 (DFID) and the Wellcome Trust from 2011 onwards. SL was funded by DFID and the Wellcome Trust. IA  
41 was funded by the London School of Hygiene and Tropical Medicine.  
42

## 43 **Conflict of Interest**

44 All authors have no conflicts of interest  
45

## 46 **Author contributions**

47 TC conceived the study, carried out the literature review, gathered the data, carried out the analyses,  
48 contributed to their interpretation, wrote the first draft of the paper, and collated inputs to all subsequent  
49 drafts. SL contributed to the analysis and interpretation and revised the paper. BN, IA, AP and CM  
50 contributed to the interpretation of the analyses and added clinical and health systems perspectives to the  
51 narrative. AP and CM also added insights from their many years working in the Malawian health system.  
52 All authors reviewed and revised several iterations of the paper, contributed intellectual content and have  
53 seen and approved the final version of the paper.  
54  
55  
56  
57  
58  
59  
60

## References

1. National Statistical Office (NSO), ICF Macro. Malawi Demographic and Health Survey 2010. Zomba, Malawi, and Calverton, Maryland, USA: NSO and ICF Macro, 2011.
2. UN. Millenium Development Goal 5: Improve Maternal Health. Available at <http://www.un.org/millenniumgoals/maternal.shtml> (last accessed 19th September 2012). Secondary Millenium Development Goal 5: Improve Maternal Health. Available at <http://www.un.org/millenniumgoals/maternal.shtml> (last accessed 19th September 2012) 2012.
3. National Statistics Office Malawi, Macro International USA. Malawi Demographic and Health Survey 1992. Calverton, Maryland: NSO and Macro International Inc., 1994.
4. WHO. International statistical classification of diseases and related health problems. 10th Revision. Vol. 2. Instruction Manual. 2010 Edition. Geneva: World Health Organisation, 2010:134.
5. Khan KS, Wojdyla D, Say L, et al. WHO analysis of causes of maternal death: a systematic review. *Lancet* 2006;**367**(9516):1066-74 doi: 10.1016/S0140-6736(06)68397-9[published Online First: Epub Date]].
6. Thaddeus S, Maine D. Too far to walk: maternal mortality in context. *Social Science & Medicine* 1994;**38**(8):1091-110
7. Bowie C, Geubbels E. Chapter 5 – The epidemiology of maternal mortality 2nd edition. The Epidemiology of Malawi. available at: [http://www.medcol.mw/commhealth/publications/epi\\_book/Maternal\\_health\\_v2\\_2.pdf](http://www.medcol.mw/commhealth/publications/epi_book/Maternal_health_v2_2.pdf) (accessed 14/08/2013): Department of Community Health, College of Medicine, Malawi, 2013.
8. Lewycka S, Mwansambo C, Kazembe P, et al. A cluster randomised controlled trial of the community effectiveness of two interventions in rural Malawi to improve health care and to reduce maternal, newborn and infant mortality. *Trials* 2010;**11**:88 doi: 10.1186/1745-6215-11-88[published Online First: Epub Date]].
9. Lewycka S, Mwansambo C, Rosato M, et al. Effect of women’s groups and volunteer peer counsellors on rates of mortality, morbidity and health behaviours in mothers and children in rural Malawi (MaiMwana): a factorial, cluster-randomised controlled trial. *Lancet* 2013;**381**:1721-35
10. Colbourn T, Nambiar B, Bondo A, et al. Effects of quality improvement in health facilities and community mobilisation through women’s groups on maternal, neonatal and perinatal mortality in three districts of Malawi: MaiKhanda, a cluster randomised controlled effectiveness trial. *International Health* 2013;doi:10.1093/inthealth/iht011 (published online 26th June 2013 open access: <http://inthealth.oxfordjournals.org/content/early/2013/06/26/inthealth.iht011.full.pdf>)
11. Newcombe RG. Interval estimation for the difference between independent proportions: comparison of eleven methods. *Statistics in Medicine* 1998;**17**(8):873-90
12. Stanton C, Abderrahim N, Hill K. An assessment of DHS maternal mortality indicators. *Studies in Family Planning*.31(2):111-23 2000
13. Hakkert R. Country estimates of maternal mortality: an alternative model. *Statistics in Medicine* 2001;**20**:3505-24
14. Buor D, Bream K. An Analysis of the Determinants of Maternal Mortality in Sub-Saharan Africa. *Journal of Women's Health* 2004;**13**(8):926-38



15. WHO, UNICEF, UNFPA, et al. Trends in Maternal Mortality: 1990 to 2010. Geneva: World Health Organisation, 2012.
16. Lozano R, Wang H, Foreman K, et al. Progress towards Millennium Development Goals 4 and 5 on maternal and child mortality: an updated systematic analysis. *Lancet* 2011;**378**:1139-65
17. Ronsmans C, Graham WJ, on behalf of The Lancet Maternal Survival Series steering group. Maternal Mortality: who, when, where, why. *Lancet* 2006;**368**:1189-200
18. Campbell OMR, Graham WJ, The Lancet Maternal Survival Series steering g. Maternal Survival 2. Strategies for reducing maternal mortality: getting on with what works. *Lancet* 2006;**368**(1284):1299
19. Calvert C, Ronsmans C. The contribution of HIV to pregnancy-related mortality: a systematic review and meta-analysis. *AIDS* 2013;**27**:Feb 25 [Epub ahead of print]
20. Mwangomba B, Zachariah R, Massaquoi M, et al. Mortality Reduction Associated with HIV/AIDS Care and Antiretroviral Treatment in Rural Malawi: Evidence from Registers, Coffin Sales and Funerals. *PLoS One* 2010;**5**(5):e10452
21. Fasawe O, Avila C, Shaffer N, et al. Cost-Effectiveness Analysis of Option B+ for HIV Prevention and Treatment of Mothers and Children in Malawi. *PLoS One* 2013;**8**(3):e57778
22. Stanton C, Abderrahim N, Hill K. DHS Maternal Mortality Indicators: An Assessment of Data Quality and Implications for Data Use. Calverton Maryland: Macro International Inc., 1997.
23. National Statistics Office [Malawi], UNICEF. Malawi Multiple Indicator Cluster Survey 2006, Final Report. Lilongwe, Malawi: National Statistical Office and UNICEF, 2008.
24. Rutstein SO, Rojas G. Guide to DHS Statistics. Calverton, Maryland, USA: Demographic and Health Surveys, ORC Macro, 2006.
25. Colbourn T, Nambiar B, Costello A. MaiKhanda - Final evaluation report. The impact of quality improvement at health facilities and community mobilisation by women's groups on birth outcomes: an effectiveness study in three districts of Malawi. Available at <http://www.health.org.uk/publications/maikhanda/> (accessed 13/08/2013). London: The Health Foundation, 2013:1-364.
26. National Institute of Population Research and Training (NIPORT) OM, University JH, B. I. Bangladesh Maternal Health Services and Maternal Mortality Survey 2001. Dhaka, Bangladesh and Calverton, Maryland (USA): NIPORT, ORC Macro, Johns Hopkins University, and ICDDR,B., 2003.
27. Anwar ATMI. Case studies to understand variations in levels of maternal mortality between Bangladesh and Malawi. Doctoral thesis. London School of Hygiene and Tropical Medicine (LSHTM), 2012.
28. Suvedi, Krishna B, A. P, et al. Nepal Maternal Mortality and Morbidity Study 2008/2009: Summary of Preliminary Findings. Kathmandu, Nepal: Family Health division, Department of Health Services, Ministry of Health, Government of Nepal, 2009.
29. Ministry of Health and Population (MOHP) [Nepal], New ERA, ICF International Inc. Nepal Demographic and Health Survey 2011. Kathmandu, Nepal: Ministry of Health and Population, New ERA, and ICF International, Calverton, Maryland., 2012.
30. Graham WJ, Bell JS, Bullough CHW. Can skilled attendance at delivery reduce maternal mortality in developing countries. *Studies in HSO&P* 2001;**17**(97):130
31. Harvey SA, Blandón YCW, McCaw-Binns A, et al. Are skilled birth attendants really skilled? A measurement method, some disturbing results and a potential way forward. *Bulletin of the World Health Organisation* 2007;**85**(10):783-90

- 1  
2  
3  
4  
5  
6  
7  
8  
9  
10  
11  
12  
13  
14  
15  
16  
17  
18  
19  
20  
21  
22  
23  
24  
25  
26  
27  
28  
29  
30  
31  
32  
33  
34  
35  
36  
37  
38  
39  
40  
41  
42  
43  
44  
45  
46  
47  
48  
49  
50  
51  
52  
53  
54  
55  
56  
57  
58  
59  
60
32. Ronsmans C, Van Damme W, Filippi V, et al. Need for caesarean sections in west Africa. *Lancet* 2002;**359**:974
  33. Republic of Malawi Ministry of Health. Malawi 2010 EmONC Needs Assessment Final Report, 2010.
  34. van Amelsfoort JJ, van Leeuwen PA, Jiskoot P, et al. Surgery in Malawi--the training of clinical officers. *Tropical Doctor* 2010;**40**(2):74-76
  35. Wilhelm TJ, Thawe IK, Mwatibu B, et al. Efficacy of major general surgery performed by non-physician clinicians at a central hospital in Malawi. *Tropical Doctor* 2011;**41**(2):71-75
  36. Chilopora G, Pereira C, Kamwendo F, et al. Postoperative outcome of caesarean sections and other major emergency obstetric surgery by clinical officers and medical officers in Malawi. *Human Resources for Health* 2007;**5**:17
  37. Chowdhury M, Ahmed A, Kalim N, et al. Causes of maternal mortality decline in Matlab, Bangladesh. *Journal of Health, Population & Nutrition*. 2009;**27**(2):108-23
  38. Winikoff B, Sullivan M. Assessing the role of family planning in reducing maternal mortality. *Studies in Family Planning*.18(3):128-43 1987:Jun
  39. Cleland J, Bernstein S, Ezeh A, et al. Family planning: the unfinished agenda. *Lancet* 2006;**368**:1810-27
  40. McCoy D, Ashwood-Smith H, Ratsma E, et al. Going from bad to worse: Malawi's maternal mortality. An analysis of the clinical, health systems and underlying reasons, with recommendations for national and international stakeholders: Commissioned by Task Force 4 of the UN Millenium Project, 2004.
  41. Karlsen S, Say L, Souza J-P, et al. The relationship between maternal education and mortality among women giving birth in health care institutions: Analysis of the cross sectional WHO Global Survey on Maternal and Perinatal Health. *BMC Public Health* 2011;**11**:606
  42. Stecklov G. Maternal Mortality Estimation: Separating Pregnancy-Related and Non- Pregnancy-Related Risks. *Studies in Family Planning* 1995;**26**(1):33-38
  43. Cross S, Bell JS, Graham WJ. What you count is what you target: the implications of maternal death classification for tracking progress towards reducing maternal mortality in developing countries. *Bulletin of the World Health Organization* 2010;**88**(2):147-53 doi: 10.2471/BLT.09.063537[published Online First: Epub Date]].
  44. National Statistics Office (NSO) [Malawi], ORC Macro [USA]. Malawi Demographic and Health Survey 2004. Calverton, Maryland: NSO and ORC Macro, 2005.
  45. UNAIDS. Malawi HIV epidemiological factsheet. 2011 31/05/2011. <http://www.unaids.org/en/dataanalysis/epidemiology/epidemiologicalfactsheets/> (accessed 31/05/2011).
  46. Jahn A, Floyd S, Crampin AC, et al. Population-level effect of HIV on adult mortality and early evidence of reversal after introduction of antiretroviral therapy in Malawi. *Lancet* 2008;**371**:1603-11
  47. Harries A, Makombe S, Libamba E, et al. Why Did the Scale-up of HIV Treatment Work?: A Case Example From Malawi. *Journal Of Acquired Immune Deficiency Syndromes* 2011;**2011**(57):S64-S67
  48. Zaba B, Calvert C, Marston M, et al. Effect of HIV infection on pregnancy-related mortality in sub-Saharan Africa: secondary analyses of pooled community-based data from the network for Analysing Longitudinal Population-based HIV/AIDS data on Africa (ALPHA). *Lancet* 2013;**381**:1763-71

- 1  
2  
3  
4  
5  
6  
7  
8  
9  
10  
11  
12  
13  
14  
15  
16  
17  
18  
19  
20  
21  
22  
23  
24  
25  
26  
27  
28  
29  
30  
31  
32  
33  
34  
35  
36  
37  
38  
39  
40  
41  
42  
43  
44  
45  
46  
47  
48  
49  
50  
51  
52  
53  
54  
55  
56  
57  
58  
59  
60
49. McCoy D, McPake B, Mwapasa V. The double burden of human resource and HIV crises: a case study of Malawi. *Human Resources for Health* 2008;**6**(16):doi:10.1186/478-4491-6-16
  50. Graham WJ, Hussein J. Measuring and Estimating Maternal Mortality in the era of HIV/AIDS. Workshop on HIV/AIDS and Adult Mortality in Developing Countries: Population Division, Department of Economic and Social Affairs, United Nations Secretariat, 2003.
  51. Wiebenga JE. Maternal mortality at Queen Elizabeth Central Hospital, 1989 to 1990. *Malawi Medical Journal*.8(1):19-23 1992
  52. Lema VM, Changole J, Kanyighe C, et al. Maternal mortality at the Queen Elizabeth Central Teaching Hospital, Blantyre, Malawi.[see comment]. *East African Medical Journal*.82(1):3-9 2005
  53. Kongnyuy EJ, Mlava G, van den BN. Facility-based maternal death review in three districts in the central region of Malawi an analysis of causes and characteristics of maternal deaths. *Womens Health Issues*. 2009(1):14-20
  54. Vink NM, de Jonge HCC, Ter Haar R, et al. Maternal death reviews at a rural hospital in Malawi. *International Journal of Gynaecology & Obstetrics* 2013;**120**(74-77)
  55. Combs Thorsen V, Sundby J, Malata A. Piecing Together the Maternal Death Puzzle through Narratives: The Three Delays Model Revisited. *PLoS One* 2012;**7**(12):e52090
  56. Bicego, George, Boerma, et al. The effect of AIDS on maternal mortality in Malawi and Zimbabwe. *AIDS* 2002;**16**(7):1078-81
  57. Government of Malawi Ministry of Health. Quarterly HIV Programme Report: April - June 2010. Available at: [http://www.hivunitmohmw.org/uploads/Main/Quarterly HIV Programme Report 2010 Q2.pdf](http://www.hivunitmohmw.org/uploads/Main/Quarterly_HIV_Programme_Report_2010_Q2.pdf) (accessed 13/08/2013), 2010.
  58. Government of Malawi Ministry of Health. Integrated HIV Program Report: October –December 2012. Available at: [http://www.hivunitmohmw.org/uploads/Main/Quarterly HIV Programme Report 2012 Q4.pdf](http://www.hivunitmohmw.org/uploads/Main/Quarterly_HIV_Programme_Report_2012_Q4.pdf) (accessed 13/08/2013), 2012.
  59. Etard JF, Kodio B, Ronsmans C. Seasonal variation in direct obstetric mortality in rural Senegal: Role of Malaria? *American Journal of Tropical Medicine & Hygiene* 2003;**68**(4):503-4
  60. Anya SE. Seasonal variation in the risk and causes of maternal death in the Gambia: Malaria appears to be an important factor. *American Journal of Tropical Medicine & Hygiene* 2004;**70**(5):510-13
  61. Desai M, Phillips-Howard PA, Odhiambo FO, et al. An Analysis of Pregnancy-Related Mortality in the KEMRI/CDC Health and Demographic Surveillance System in Western Kenya. *PLoS One* 2013;**8**(7):e68733
  62. Roca-Feltrer A, Kwizombe CJ, Sanjoaquin MA, et al. Lack of Decline in Childhood Malaria, Malawi, 2001–2010. *Emerging Infectious Diseases* 2012;**18**(2):272-78
  63. Okiro EA, Kazembe LN, Kabaria CW, et al. Childhood Malaria Admission Rates to Four Hospitals in Malawi between 2000 and 2010. *PLoS One* 2013;**8**(4):e62214
  64. Gutman J, Mwandama D, Wiegand RE, et al. Effectiveness of Intermittent Preventive Treatment With Sulfadoxine-Pyrimethamine During Pregnancy on Maternal and Birth Outcomes in Machinga District, Malawi. *Journal of Infectious Diseases* 2013:[Epub ahead of print]
  65. Muula AS, Phiri A. Did Maternal Mortality Ratio increase in Malawi between 1992-1998? Review of the Malawi Demographic and Health Surveys and other data sources. *Tropical Doctor* 2003;**33**:182-85
  66. World Bank. Poverty gap at \$1.25 a day (PPP) (%), Malawi 1998: 46%, 2004: 32%, 2010: 26%. World DataBank, World Development Indicators

- 1  
2 <http://databank.worldbank.org/data/views/reports/chart.aspx>; accessed 14/08/2013),  
3 2013.  
4
- 5 67. Ratsma E, Lungu K, Hofman J, et al. Why more mothers die: confidential enquiries into institutional  
6 maternal deaths in the Southern Region of Malawi. *Malawi Medical Journal* 2005;**17**(3):75-80  
7
- 8 68. Department for International Development (DFID), Management Sciences for Health (MSH),  
9 Management Solutions Consulting (MSC) Limited. Evaluation of Malawi's Emergency Human  
10 Resources Programme, 2010.  
11
- 12 69. Hussein J, Goodburn EA, Damisoni H, et al. Monitoring obstetric services: Putting the 'UN guidelines'  
13 into practice in Malawi: 3 Years on. *International Journal of Gynecology and Obstetrics*  
14 2001;**75**(1):63-73  
15
- 16 70. Lungu K, Ratsma Y. Does the upgrading of the radio communications network in health facilities reduce  
17 the delay in the referral of obstetric emergencies in Southern Malawi? *Malawi Medical Journal*  
18 2007;**19**(1):1-8  
19
- 20 71. Hofman J, Dzimadzi C, Lungu K, et al. Motorcycle ambulances for referral of obstetric emergencies in  
21 rural Malawi: Do they reduce delay and what do they cost? *International Journal of Gynecology*  
22 *and Obstetrics* 2008;**102**(191-197)  
23
- 24 72. Bowie C, Mwase T. Assessing the use of an essential health package in a sector wide approach in  
25 Malawi. *Health Research Policy and Systems* 2011;**9**(4)  
26
- 27 73. Leigh B, Mwale TG, Lazaro D, et al. Emergency obstetric care: How do we stand in Malawi?  
28 *International Journal of Gynecology and Obstetrics* 2008;**101**:107-11  
29
- 30 74. Mueller DH, Lungu D, Acharya A, et al. Constraints to implementing the Essential Health Package in  
31 Malawi. *PLoS One* 2011;**6**(6)  
32
- 33 75. National AIDS Commission. Estimating National HIV Prevalence in Malawi from Sentinel Surveillance  
34 Data. Technical Report. Lilongwe, Malawi, 2003.  
35
- 36 76. Matthews Z, Channon A, Neal S, et al. Examining the "urban advantage" in maternal health care in  
37 developing countries. *PLoS medicine* 2010;**7**(9) doi: 10.1371/journal.pmed.1000327[published  
38 Online First: Epub Date]].  
39
- 40 77. Jahn A, Floyd S, McGrath N, et al. Child mortality in rural Malawi: HIV closes the survival gap  
41 between the socio-economic strata. *PLoS One* 2010;**5**(6):e11320 doi:  
42 10.1371/journal.pone.0011320[published Online First: Epub Date]].  
43
- 44 78. Mann G, Bokasi M, Sangala W. Why are pregnant women dying? An equity analysis of maternal  
45 mortality in Malawi. *Malawi Medical Journal* 2006;**18**(1):32-38  
46
- 47 79. UNICEF. The Situation of Women and Children in Malawi.  
48 <http://www.unicef.org/malawi/children.html> (Accessed 15/08/2013), 2013.  
49
- 50 80. WHO, UNICEF. Countdown to 2015, Maternal, Newborn and Child Survival: Building a Brighter  
51 Future for Women and Children, The 2012 Report, 2012.  
52
- 53 81. Graham W, Newell ML. Seizing the opportunity: collaborative initiatives to reduce HIV and maternal  
54 mortality. *Lancet* 1999;**353**:836-39  
55
- 56 82. Chipangwi JD, Zamaere TP, Graham WJ, et al. Maternal mortality in the Thyolo District of southern  
57 Malawi. *East African Medical Journal* 1992;**69**(12):675-9  
58
- 59 83. McDermott JM, Slutsker L, Steketee RW, et al. Prospective assessment of mortality among a cohort of  
60 pregnant women in rural Malawi. *American Journal of Tropical Medicine & Hygiene*.55(1  
Suppl):66-70 1996

- 1  
2  
3  
4  
5  
6  
7  
8  
9  
10  
11  
12  
13  
14  
15  
16  
17  
18  
19  
20  
21  
22  
23  
24  
25  
26  
27  
28  
29  
30  
31  
32  
33  
34  
35  
36  
37  
38  
39  
40  
41  
42  
43  
44  
45  
46  
47  
48  
49  
50  
51  
52  
53  
54  
55  
56  
57  
58  
59  
60
84. Beltman JJ, van den Akker T, Lam E, et al. Repetition of a sisterhood survey at district level in Malawi: the challenge to achieve MDG 5. *BMJ Open* 2011;**1**(e000080) doi: D - NLM: PMC3191428 EDAT- 2011/10/25 06:00 MHDA- 2011/10/25 06:01 CRDT- 2011/10/25 06:00 PHST- 2011/05/05 [aheadofprint] AID - bmjopen-2011-000080 [pii] AID - 10.1136/bmjopen-2011-000080 [doi] PST - epublish[published Online First: Epub Date].
85. National Statistics Office M, Macro International USA. *Malawi Demographic and Health Survey 2000*. Zomba, Malawi and Calverton, Maryland, US: NSO and Macro International Inc., 2001.
86. van den Broek NR, White SA, Ntonya C, et al. Reproductive health in rural Malawi: a population-based survey. *BJOG: An International Journal of Obstetrics & Gynaecology*.110(10):902-8 2003
87. National Statistical Office (NSO). *Malawi Family Formation Survey*. Zomba, Malawi: Government Printer, 1984.
88. World Bank. World DataBank. World Development Indicators, Malawi (available at: <http://databank.worldbank.org/data/views/reports/chart.aspx> (accessed 13/08/2013).
89. World Health Organisation. WHO Statistical Information System Database (available at: <http://apps.who.int/whosis/data/Search.jsp> (accessed 13/08/2013).
90. National Aids Commission. *Estimating National HIV Prevalence in Malawi from Sentinel Surveillance Data: Technical Report*. Lilongwe, Malawi; October 2003. Lilongwe, Malawi, 2003.

**Figure 1: Trends in maternal mortality in Malawi and its Southern, Central and Northern regions, and estimated maternal mortality due to HIV, 1977 to 2010**

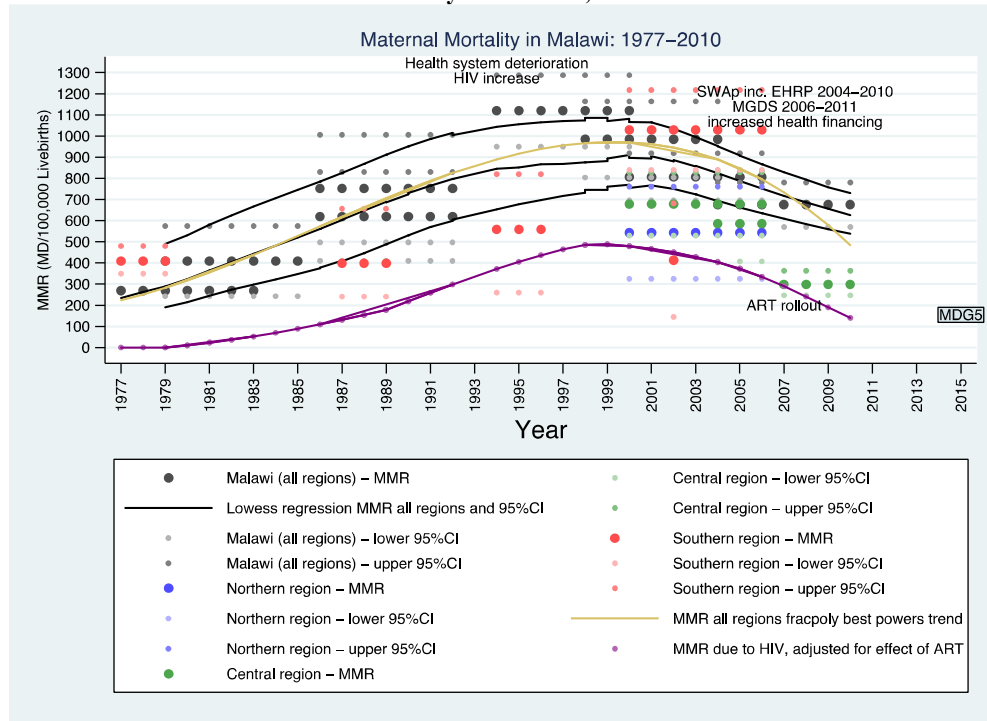

review only



Figure 2: Overview of variables linked to maternal mortality in Malawi

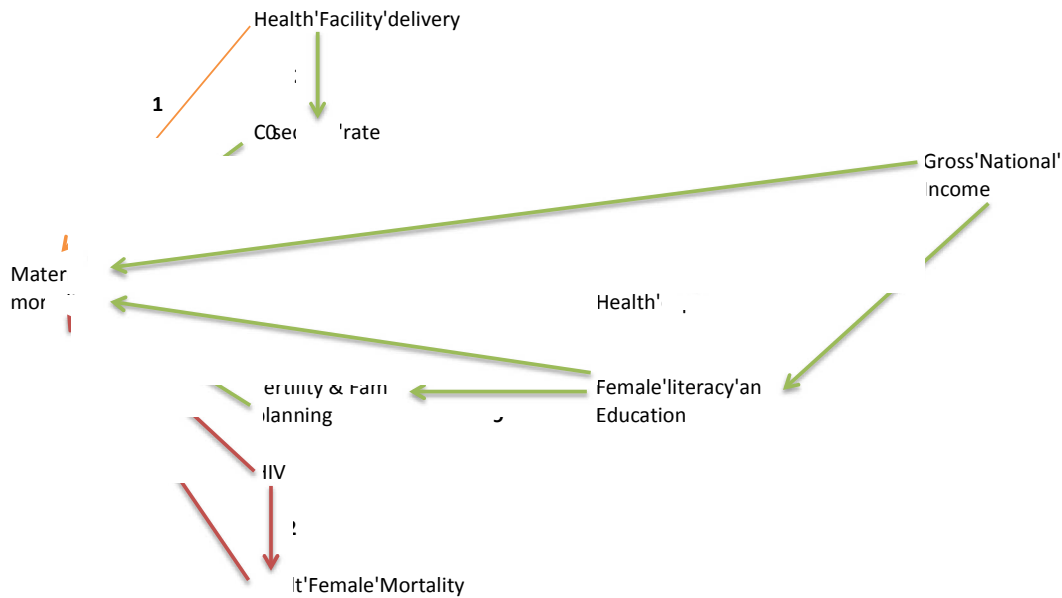

Overview of variables linked to maternal mortality in Malawi. Green arrows show beneficial effects, red arrows negative effects and orange arrows positive and negative effects

1 Increased health facility delivery could reduce maternal mortality by improving skilled birth attendance, however, overcrowding could reduce quality of care and increase maternal case fatality rates in health facilities

2 Caesarean sections only occur in health facilities and are likely to increase as health facility deliveries increase. If undertaken for life saving purposes such an increase could reduce maternal mortality

3 As the Caesarean section rate increases towards the WHO recommended minimum of 5% of deliveries more women who need emergency Caesarean sections are likely to get them and therefore be more likely to survive severe complications of delivery

4 Large increases in GNI could independently reduce maternal mortality via leading to many improvements in living conditions, as well as via increased health expenditure (5) and increased spending on education leading to improved female literacy and education (6)

7 Increased health expenditure should improve the functioning of the health system leading to reduced maternal mortality via improved quality of antenatal, obstetric and postnatal care

8 Increased female literacy and education should lead to reduced maternal mortality via allowing improved knowledge of maternal health problems, importance of health care and birth preparedness as well as improved family planning and reduced fertility (9)

10 Increases in family planning practices will reduce fertility i.e. reduce exposure to pregnancy and child birth

11 HIV contributes to both indirect and direct maternal mortality and via deaths from AIDS is responsible for a subset of total adult female mortality (12) which can be conflated with maternal mortality (13) if deaths coincidental with pregnancy but not related to it are included

only

**Table 1. Population-based Studies and Analyses of Maternal Mortality in Malawi**

| Study                                   | Year      | Method                           | Case Definition                                                                                                                            | Location                                                       | Maternal Deaths | MMR (95% CI) <sup>a</sup>        |
|-----------------------------------------|-----------|----------------------------------|--------------------------------------------------------------------------------------------------------------------------------------------|----------------------------------------------------------------|-----------------|----------------------------------|
| Chiphangwi (1992) [82]                  | 1977-1979 | Indirect Sisterhood <sup>b</sup> | Deaths of sisters who died "during pregnancy, childbirth or within 6 weeks of giving birth"                                                | Southern Region (Thyolo district)                              | 150             | <b>409</b> (349-480)             |
| Malawi DHS 1992 (re-analysis) [22]      | 1977-1983 | Direct Sisterhood                | Deaths during pregnancy, childbirth and up to 6-weeks afterwards                                                                           | Malawi (all regions)                                           |                 | <b>269</b> (??)                  |
| Malawi DHS 1992 (re-analysis) [22]      | 1979-1985 | Direct Sisterhood                | (as above)                                                                                                                                 | Malawi (all regions)                                           | 42              | <b>408</b> (242-575)             |
| McDermot 1996 [83]                      | 1987-1989 | Prospective Cohort               | All deaths during pregnancy, childbirth and up to 6-weeks after (not excluding accidental/incidental deaths)                               | Southern Region (Mangochi district)                            | 15              | <b>398</b> (241-656)             |
| Malawi DHS 1992 <sup>c</sup> [3]        | 1986-1992 | Direct Sisterhood                | (as above)                                                                                                                                 | Malawi (all regions)                                           | 71              | <b>620<sup>d</sup></b> (410-830) |
| Malawi DHS 1992 (re-analysis) [22]      | 1986-1992 | Direct Sisterhood                | (as above)                                                                                                                                 | Malawi (all regions)                                           | 82              | <b>752</b> (497-1006)            |
| Beltman 2011 [84]                       | 1994-1996 | Indirect Sisterhood <sup>b</sup> | Deaths of sisters who died "during pregnancy, childbirth or within 6 weeks of giving birth"                                                | Southern Region (Thyolo district)                              | 84              | <b>558</b> (260-820)             |
| Malawi DHS 2000 <sup>e</sup> [85]       | 1994-2000 | Direct Sisterhood                | Deaths during pregnancy, childbirth and up to 2-months afterwards                                                                          | Malawi (all regions)                                           | 344             | <b>1120</b> (950-1288)           |
| Malawi DHS 2004 <sup>e</sup> [44]       | 1998-2004 | Direct Sisterhood                | Deaths during pregnancy, childbirth and up to 2-months afterwards                                                                          | Malawi (all regions)                                           | 240             | <b>984</b> (804-1164)            |
| MICS 2006 <sup>e</sup> [23]             | 2000-2006 | Direct Sisterhood                | Deaths during pregnancy, childbirth and up to 2-months afterwards                                                                          | Northern Region                                                | 33              | <b>543</b> (325-761)             |
|                                         |           |                                  |                                                                                                                                            | Central Region                                                 | 190             | <b>678</b> (529-828)             |
|                                         |           |                                  |                                                                                                                                            | Southern Region                                                | 246             | <b>1029</b> (840-1217)           |
|                                         |           |                                  |                                                                                                                                            | Urban Malawi                                                   | 77              | <b>861</b> (492-1230)            |
|                                         |           |                                  |                                                                                                                                            | Rural Malawi                                                   | 392             | <b>802</b> (689-915)             |
|                                         |           |                                  |                                                                                                                                            | Malawi (all regions)                                           | 469             | <b>807</b> (696-918)             |
| van den Broek 2003 [86]                 | 2002      | Household Survey                 | "The death of a woman associated with childbirth". Timing not stated.                                                                      | Southern Region (rural)                                        | 9               | <b>413</b> (144-682)             |
| Malawi DHS 2010 <sup>e</sup> [1]        | 2004-2010 | Direct Sisterhood                | Deaths during pregnancy, childbirth and up to 2-months afterwards                                                                          | Malawi (all regions)                                           | 331             | <b>675</b> (570-780)             |
| MaiMwana (control arm) [9]              | 2006-2009 | Surveillance (Prospective)       | WHO ICD-10 maternal death (see Background section). All 29 maternal deaths were verified by verbal autopsy.                                | Central Region (Mchinji district, rural)                       | 29              | <b>585</b> (407-838)             |
| MaiKhanda (total <sup>e</sup> ) [10 25] | 2007-2010 | Surveillance (Prospective)       | WHO ICD-10 maternal death (see Background section), 51/102 (50%) verified by verbal autopsy, the rest verified by call-backs to community. | Central Region (Kasungu, Lilongwe and Salima districts, rural) | 102             | <b>299</b> (247-363)             |

<sup>a</sup>calculated as (100,000 / MMR)\*Maternal deaths; for sisterhood studies calculated as ((maternal deaths / exposure years) / general fertility rate) \* 100,000

Shouldn't be compared with direct sisterhood method as although the reference period is on average 12 years before the survey it includes more recent deaths, which will bias the 12-year old estimate upwards given that the MMR in Malawi increased in the 1990s.

<sup>c</sup> The lower 95%CI of the MMR is calculated from the upper 95%CI of the GFR (less deaths per more births) and visa-versa. Fertility is only reported for the whole sample in the MICS survey, therefore only the whole sample MMR (Malawi (all regions)) could be recalculated.

<sup>d</sup>In the 1992 DHS the GFR used to calculate MMR is stated as 0.220 (Table 11.4, page 123). However in Chapter 3 on Fertility the total GFR is stated as 223 per 1000 women (or 0.223; Table 3.1 page 19) but this is for women aged 15-44 only. Using the raw data on number of women interviewed weighted by population of each cluster (district) so that the sample is representative of the whole of Malawi (Table 2.8.2 page 15) results in a Total GFR per woman aged 15-49 of 0.208 which is different to the 0.220 used to arrive at the MMR of 620 produced in the report.

<sup>e</sup>Given the MaiKhanda trial showed no effect of either of the interventions on maternal mortality

**Table 2: Comparison of estimated trends in the maternal mortality ratio in Malawi from 1990 to 2010**

| 1990 | 1995 | 2000 | 2005 | 2010 | Source                                       |
|------|------|------|------|------|----------------------------------------------|
| 748  | 916  | 970  | 846  | 484  | This paper, all years of survey <sup>a</sup> |
| 606  |      | 1397 |      | 422  | IHME                                         |
| 1100 | 1000 | 840  | 630  | 460  | MMEIG                                        |

<sup>a</sup>Best-fitting fractional polynomial transformation of MMR by year, using estimates for all years covered by each survey, see Web Appendix 1 for explanation

For peer review only

**Table 3. Changes in variables hypothesised to be associated with changes in maternal mortality in Malawi**

| Variable                                                                     | Trend: Year |                         |                         |                         |                         |                        |
|------------------------------------------------------------------------------|-------------|-------------------------|-------------------------|-------------------------|-------------------------|------------------------|
|                                                                              | 1982        | 1989                    | 1997                    | 2001                    | 2003                    | 2007                   |
| <b>MMR (approximate from Figure 1)</b>                                       | <b>400</b>  | <b>700</b>              | <b>950</b>              | <b>950</b>              | <b>800</b>              | <b>700</b>             |
| % deliveries by skilled attendant                                            |             | 55.5% [3]               | 55.6% [85]              | 57% [44]                | 54% [23]                | 71.4% [1]              |
| % of deliveries by TBA                                                       |             | 17.7% [3]               | 22.7% [85]              | 26.2% [44]              | 28.8% [23]              |                        |
| % of deliveries by Relative / other person                                   |             | 21.8% [3]               | 19.0% [85]              | 14.2% [44]              | 13.0% [23]              |                        |
| % of deliveries alone                                                        |             | 5.0% [3]                | 2.4% [85]               | 2.1% [44]               | 2.4% [23]               |                        |
| % of deliveries by C-Section                                                 |             | 3.4% [3] <sup>a</sup>   | 2.8% [85] <sup>a</sup>  | 3.1% [44] <sup>a</sup>  | 2.8% [73] <sup>a</sup>  | 4.6% [1]               |
| Total Fertility Rate (TFR) <sup>b</sup>                                      | 7.6 [87]    | 6.7 [3]                 | 6.3 [85]                | 6.0 [44]                | 6.3 [23]                | 5.7 [1]                |
| General Fertility Rate (GFR) <sup>c</sup>                                    | 0.264 [87]  | 0.223 [3]               | 0.223 [85]              | 0.215 [44]              | 0.225 [23]              | 0.202 [1]              |
| Unmet need for FP services (%)                                               |             | 36% [3]                 | 30% [85]                | 28% [7]                 |                         | 26% [1]                |
| Contraceptive prevalence rate (%)                                            |             | 13.0% [3]               | 32.5% [85]              | 32.5% [7]               | 41% [8]                 | 42.2% [1]              |
| GNI per capita (Atlas method, current US\$)                                  | \$180 [88]  | \$160 [88]              | \$200 [88]              | \$140 [88]              | \$190 [88]              | \$250 [88]             |
| GNI per capita, Purchasing Power Parity (PPP) (current International \$)     | \$330 [88]  | \$380 [88]              | \$550 [88]              | \$550 [88]              | \$580 [88]              | \$710 [88]             |
| Per capita Total expenditure on health (average exchange rate US\$)          |             |                         | \$20 [89]               | \$11 [89]               | \$18 [89]               | \$20 [89] <sup>d</sup> |
| Per capita Total expenditure on health (PPP, international \$)               |             |                         | \$35 [89]               | \$34 [89]               | \$60 [89]               | \$70 [89] <sup>d</sup> |
| Per capita Government expenditure on health (average exchange rate US\$)     |             |                         | \$6 [89]                | \$7 [89]                | \$13 [89]               | \$15 [89] <sup>d</sup> |
| Per capita Government expenditure on health (PPP, international \$)          |             |                         | \$10 [89]               | \$21 [89]               | \$45 [89]               | \$51 [89] <sup>d</sup> |
| External Resources for Health as a Percentage of Total expenditure on health |             |                         | 19.5% [89]              | 42.4% [89]              | 61.6% [89]              |                        |
| Female literacy rate (ages 15 and above)                                     |             | 33.5% [88] <sup>f</sup> | 54% [88] <sup>g</sup>   | 56.5% [85] <sup>h</sup> | 62.4% [44] <sup>i</sup> | 67.6% [1] <sup>j</sup> |
| Secondary school enrolment of females (gross %)                              | 10% [88]    | 11.5% [88]              | 20.4% [88] <sup>k</sup> | 28.8% [88]              | 25.5% [88] <sup>l</sup> | 26.4% [88]             |
| Female Life Expectancy at birth                                              | 46.1 [88]   | 48.1 [88]               | 46.9 [88]               | 46.5 [88]               | 47.3 [88]               | 50.8 [88]              |
| Adult Female Mortality (mortality rate/1000)                                 |             | 6.5 [3]                 | 11.3 [85]               | 11.6 [44]               | 8.7 [23]                | 8.4 [1]                |
| HIV prevalence                                                               | 0% [90]     | 5% [90]                 | 14% [90]                | 14% [90]                | 13% [90]                | 12% [45]               |
| Short maternal stature (% <145cm tall)                                       |             | 2.8% [3] <sup>m</sup>   |                         | 3.0% [85] <sup>n</sup>  | 3.1% [44] <sup>j</sup>  | 2.4% [1] <sup>o</sup>  |

<sup>a</sup> Livebirths only<sup>b</sup> Average number of children born to a women during her lifetime<sup>c</sup> Births / number of women aged 15-44<sup>d</sup> Estimate for 2006<sup>e</sup> Estimate for 1980<sup>f</sup> Estimate for 1987<sup>g</sup> Estimate for 1998<sup>h</sup> Estimate for 2000. If women who can only read part of a sentence are excluded then 48.6%<sup>i</sup> Estimate for 2004. If women who can only read part of a sentence are excluded then 53.8%<sup>j</sup> Estimate for 2010. If women who can only read part of a sentence are excluded then 59.4%<sup>k</sup> Estimate for 1996<sup>l</sup> Estimate for 2004<sup>m</sup> Estimate for 1992<sup>n</sup> Estimate for 2000<sup>o</sup> Estimate for 2010

## Web Appendix 1 – Estimation of Trend in Maternal Mortality in Malawi from 1977 to 2012

The best-fitting line representing the observed national level MMR data for Malawi was calculated by applying multi-term fractional polynomial transformations to a linear regression of MMR by year using the **fracpoly** command in Stata 13.0 for Mac:

**fracpoly, degree(3) compare: regress mmr year**

The **fracpoly** command transforms the independent variable **year** many times using the powers -2, -1, -.5, 0, 1, 2, 3 in combination. The number of terms used is specified by the **degree()** option. Here we used **3** as that was determined to produce a better fitting model (as assessed by the deviance statistic of the maximum likelihood estimator) than a model with 2 terms and a not statistically significantly different (at  $p < 0.05$ ) fit to a model with 4 terms. The three terms were transformations to the powers -1, 2 and 3 (each with added constants) as this combination was found to produce the best-fitting model.

The subsequent command:

**predict mmrfit**

produces the MMR trend predicted by this best-fitting fractional polynomial model, which was plotted as the gold line in Figure 1 of the paper.

The above calculation of the trend line was based on using the same estimate for each of the years represented by each of the 6 analyses of the 4 nationally representative surveys used (all of the data plotted as larger black dots on Figure 1). We believe this to be more representative than only assuming the survey estimates apply to the mid-points of the period they cover (e.g. for the DHS 2010, which spans 2004-2010, assuming the estimate of 675 only applies to 2007 rather than each of the years 2004 to 2010). Using only the mid-points to calculate the best-fitting fractional polynomial trend-line as a sensitivity analysis results in a fractional polynomial model with two terms with the powers 3 and 3 (each with added constants) and estimates of MMR that show a comparatively flatter trend over the 1990 to 2010 time-period (Web Table 1). We prefer the model using the data applied to all years covered by the survey as this uses more of the information provided by the survey.

**Web Table 1: Results of sensitivity analysis of MMR trend estimate**

| 1990 | 1995 | 2000 | 2005 | 2010 | Source                                                 |
|------|------|------|------|------|--------------------------------------------------------|
| 748  | 916  | 970  | 846  | 484  | Estimates applied to all years covered by survey       |
| 824  | 941  | 933  | 801  | 545  | Estimates applied to mid-points of survey periods only |

## Web Appendix 2 – Estimation of Maternal Mortality due to HIV in Malawi

We used the relative-risk of pregnancy-related mortality in HIV positive compared to HIV negative women estimated by Calvert and Ronsmans via systematic review and meta-analysis to be 7.74 [1], to estimate the proportion of the MMR that is due to HIV depending on the HIV prevalence. We did this using the formula provided by Calvert and Ronsmans [1]:

$$\text{PAF} = \text{hiv} * (\text{RR} - 1) / ((\text{hiv} * (\text{RR} - 1)) + 1)$$

Where: PAF, the Population Attributable Fraction is the proportion of the MMR (Maternal Mortality Ratio) due to HIV; hiv is the HIV prevalence; and RR is the relative-risk of 7.74. The MMR due to HIV is then obtained by multiplying the MMR by the PAF.

We adjusted the proportion of MMR due to HIV downwards from 2003 to 2010 to account for the increasing impact of the antiretroviral therapy (ART) programme in Malawi [2 3]. The effect of the ART programme on MMR due to HIV was estimated as follows. Using the estimate of 35% of HIV positive pregnant women being on ART provided in section 3.2.2 of the Malawi Ministry of Health ART programme report for the second quarter of 2010 [4] and the reported numbers of people on ART in each of the years from 2002 to 2007 provided by Mwangomba et al [2] as an estimate of the exponential expansion path of the ART programme we calculated a percentage of pregnant women on ART for each of the years from 2002 to 2010 (Web Table 2). To fill in the years 2008, 2009 and 2010 we used the **fracpoly** command in Stata 13.0 for Mac (see Web Appendix 1) to estimate the expected number of people on ART given the Mwangomba *et al* data and applied the 2010 figure (27153) as equalling the 35% of pregnant women on ART in 2010 (Web Table 2).

We then estimated the effectiveness of the ART programme using the ‘current practice’ data from Fasawe *et al* (2013) which accounts for drug stockouts, adherence and drug effectiveness and estimates 18267 pregnant women out of the 59850 initially reached by ART (90% of the estimated 66500 HIV positive pregnant women) would be alive after 10 years. Assuming a proportionally equal year on year decline this translates to 52465 being alive after 1 year (the approximate length of the maternal period of pregnancy and post-partum), i.e. an effectiveness of the ART programme of 87.6%. This could increase to an estimated 96.2% with Option B+ which is currently being rolled-out across Malawi [3].

Finally we applied the estimate of 87.6% effectiveness to the estimates of ART programme coverage for each of the years to arrive at the estimate of the effect of the ART programme on MMR due to HIV (Web Table 2). We then multiplied the MMR due to HIV by 1 minus the effect of the ART programme for the given year to reducing it in line with the effect of the ART programme.



**Web Table 2: Estimation of effect of ART programme on MMR due to HIV**

| Year | Number ever started on ART <sup>a</sup> | % of HIV+ pregnant women on ART, assuming 27153 people in 2010 represents 35% <sup>b</sup> | Estimate of ART programme effect (% reduction) on MMR due to HIV assuming 87.6% effectiveness |
|------|-----------------------------------------|--------------------------------------------------------------------------------------------|-----------------------------------------------------------------------------------------------|
| 2002 | 0                                       | 0%                                                                                         | 0.0%                                                                                          |
| 2003 | 421                                     | 0.5%                                                                                       | 0.5%                                                                                          |
| 2004 | 1550                                    | 2.0%                                                                                       | 1.8%                                                                                          |
| 2005 | 3145                                    | 4.1%                                                                                       | 3.6%                                                                                          |
| 2006 | 6216                                    | 8.0%                                                                                       | 7.0%                                                                                          |
| 2007 | 10215                                   | 13.2%                                                                                      | 11.5%                                                                                         |
| 2008 | 14877                                   | 19.2%                                                                                      | 16.8%                                                                                         |
| 2009 | 20554                                   | 26.5%                                                                                      | 23.2%                                                                                         |
| 2010 | 27153                                   | 35.0%                                                                                      | 30.7%                                                                                         |

<sup>a</sup> 2002 to 2007 numbers taken from the final column of Table 1 of Mwangomba et al [2]. 2008 to 2010 figures estimated using best-fitting trend line determined by fracpoly command in Stata 13.0

<sup>b</sup> The Malawi government report 35% of HIV positive pregnant women were on antiretroviral therapy [4]

#### References for Web Appendices 1 and 2

1. Calvert C, Ronsmans C. The contribution of HIV to pregnancy-related mortality: a systematic review and meta-analysis. *AIDS* 2013;**27**:Feb 25 [Epub ahead of print]
2. Mwangomba B, Zachariah R, Massaquoi M, et al. Mortality Reduction Associated with HIV/AIDS Care and Antiretroviral Treatment in Rural Malawi: Evidence from Registers, Coffin Sales and Funerals. *PLoS One* 2010;**5**(5):e10452
3. Fasawe O, Avila C, Shaffer N, et al. Cost-Effectiveness Analysis of Option B+ for HIV Prevention and Treatment of Mothers and Children in Malawi. *PLoS One* 2013;**8**(3):e57778
4. Government of Malawi Ministry of Health. Quarterly HIV Programme Report: April - June 2010. Available at: [http://www.hivunitmohmw.org/uploads/Main/Quarterly\\_HIV\\_Programme\\_Report\\_2010\\_Q2.pdf](http://www.hivunitmohmw.org/uploads/Main/Quarterly_HIV_Programme_Report_2010_Q2.pdf) (accessed 13/08/2013), 2010.



## Maternal Mortality in Malawi, 1977 to 2012

|                                 |                                                                                                                                                                                                                                                                                                                                                                                                                                                                                                                              |
|---------------------------------|------------------------------------------------------------------------------------------------------------------------------------------------------------------------------------------------------------------------------------------------------------------------------------------------------------------------------------------------------------------------------------------------------------------------------------------------------------------------------------------------------------------------------|
| Journal:                        | <i>BMJ Open</i>                                                                                                                                                                                                                                                                                                                                                                                                                                                                                                              |
| Manuscript ID:                  | bmjopen-2013-004150.R1                                                                                                                                                                                                                                                                                                                                                                                                                                                                                                       |
| Article Type:                   | Research                                                                                                                                                                                                                                                                                                                                                                                                                                                                                                                     |
| Date Submitted by the Author:   | 01-Nov-2013                                                                                                                                                                                                                                                                                                                                                                                                                                                                                                                  |
| Complete List of Authors:       | Colbourn, Timothy; UCL Institute for Global Health, ; Parent and Child Health Initiative (PACHI),<br>Lewycka, Sonia; UCL Institute for Global Health,<br>Nambiar, Bejoy; UCL Institute for Global Health, ; Parent and Child Health Initiative (PACHI),<br>Anwar, Iqbal; icddr,b, Centre for Reproductive Health<br>Phoya, Ann; Government of the Republic of Malawi, Ministry of Health, Sector-Wide Approach (SWAp)<br>Mhango, Chisale; Government of the Republic of Malawi, Ministry of Health, Reproductive Health Unit |
| <b>Primary Subject Heading</b>: | Global health                                                                                                                                                                                                                                                                                                                                                                                                                                                                                                                |
| Secondary Subject Heading:      | Epidemiology, Obstetrics and gynaecology, Public health, Reproductive medicine, Health policy                                                                                                                                                                                                                                                                                                                                                                                                                                |
| Keywords:                       | maternal mortality, Malawi, trends, health systems, HIV                                                                                                                                                                                                                                                                                                                                                                                                                                                                      |
|                                 |                                                                                                                                                                                                                                                                                                                                                                                                                                                                                                                              |

SCHOLARONE™  
Manuscripts

only

## Maternal Mortality in Malawi, 1977 to 2012

Tim Colbourn<sup>a§</sup>, Sonia Lewycka<sup>a</sup>, Bejoy Nambiar<sup>a</sup>, Iqbal Anwar<sup>b</sup>, Ann Phoya<sup>c</sup>,  
Chisale Mhango<sup>d</sup>

<sup>a</sup>UCL Institute for Global Health, 30 Guilford Street, London, WC1N 1EH, UK

<sup>b</sup>icddr, <sup>b</sup> International Centre for Diarrhoeal Diseases Research, Bangladesh, Mohakhali, Dhaka 1212

<sup>c</sup>Government of the Republic of Malawi, Ministry of Health Sector-Wide Approach (SWAp)

<sup>d</sup>Director, Government of the Republic of Malawi, Ministry of Health Reproductive Health Unit, off Paul Kagame Road, Lilongwe, Malawi

§ corresponding author: [t.colbourn@ucl.ac.uk](mailto:t.colbourn@ucl.ac.uk)

**Key Words:** Maternal Mortality, Malawi, Trends, Health systems, HIV

## Abstract

### Background

Millennium Development Goal 5 (MDG 5) targets a 75% reduction in maternal mortality from 1990 to 2015, yet accurate information on trends in maternal mortality and what drives them is sparse. We aimed to fill this gap for Malawi, a country in sub-Saharan Africa with high maternal mortality.

### Methods

We reviewed the literature for population-based studies that provide estimates of the maternal mortality ratio (MMR) in Malawi, and for studies that list and justify variables potentially associated with trends in MMR. We used all population-based estimates of MMR representative of the whole of Malawi to construct a best-fit trend-line for the range of years with available data; calculated the proportion attributable to HIV, and qualitatively analysed trends and evidence related to other covariates to logically assess likely candidate drivers of the observed trend in MMR.

### Results

Fourteen suitable estimates of MMR were found, covering the years 1977-2010. The resulting best-fit line predicted MMR in Malawi to have increased from 317 maternal deaths per 100,000 livebirths in 1980, to 748 in 1990, before peaking at 971 in 1999, and falling to 846 in 2005 and 484 in 2010. Concurrent deteriorations and improvements in HIV and health system investment and provision are the most plausible explanations for the trend. Female literacy and education, family planning, and poverty reduction could play more of a role if thresholds are passed in coming years.

### Conclusion

The decrease in MMR in Malawi is encouraging as it appears recent efforts to control HIV and improve the health system are bearing fruit. Sustained efforts to prevent and treat maternal complications are required if Malawi is to attain the MDG 5 target and save the lives of more of its mothers in years to come.

### Strengths and Limitations of this study:

- Provides most detailed review of trends in maternal mortality in Malawi to date, including estimation of trends in the maternal mortality ratio, comparison with WHO and IHME estimates, and assessment of the variables most likely to have driven the trend
- Includes quantitative estimation of the impact of HIV and antiretroviral treatment on maternal mortality in Malawi
- Sparse data precluded the possibility of quantitatively modelling the relationships between potential explanatory variables and maternal mortality in Malawi
- The study is comprehensive and conducted by researchers with extensive knowledge and experience of maternal health in Malawi; however, it is not a systematic review

## Background

Maternal mortality in Malawi is high, the most recent national survey estimate is 675 maternal deaths per 100,000 livebirths during the period 2004-2010 [1]. Millennium Development Goal (MDG) 5 aims to reduce maternal mortality by 75% between 1990 and 2015 [2]. This equates to a reduction from 620 maternal deaths per 100,000 livebirths in 1990 [3] to 155 by 2015. We review data on maternal mortality from population-based studies in Malawi, and explore trends and possible reasons behind them, in order to gauge progress towards achieving the MDG.

The maternal Mortality Ratio (MMR) is the most common measure of maternal mortality and is expressed as the number of maternal deaths per 100,000 livebirths, where a maternal death is defined as *“the death of a woman while pregnant or within 42 days of the termination of pregnancy, irrespective of the duration and the site of the pregnancy, from any cause related to or aggravated by the pregnancy or its management but not from accidental or incidental causes”* [4]. Maternal deaths can be divided into direct and indirect obstetric deaths. Direct obstetric deaths are defined as: *“those resulting from obstetric complications of the pregnant state (pregnancy, labour and puerperium), from interventions, omissions, incorrect treatment, or from a chain of events resulting from any of the above”* [4] and indirect obstetric deaths as *“those resulting from previous existing disease or disease that developed during pregnancy and which was not due to direct obstetric causes, but which was aggravated by physiologic effects of pregnancy”* [4]. Data pertaining to obstetric deaths are not always available. Deaths occurring during pregnancy, childbirth and puerperium, hereafter referred to as ‘pregnancy-related’ deaths are defined as *“death occurring during pregnancy, childbirth and puerperium is the death of a woman while pregnant or within 42 days of termination of pregnancy, irrespective of the cause of death (obstetric and non obstetric)”* [4]. Given a lack of adequate information on causes of death, surveys reporting maternal mortality often rely only on the timing of the death in relation to pregnancy and therefore report pregnancy-related mortality as MMR. In settings such as Malawi, where it is difficult to distinguish between HIV-disease-related indirect obstetric deaths and incidental deaths due to HIV coincident with pregnancy, this is also more likely.

The leading biological causes of maternal death in Africa are haemorrhage, infections and hypertensive disorders [5], and these deaths are mediated by a complex set of underlying social, economic and behavioural factors, typically grouped into the Three Delays [6]. The delay by the patient in the decision to seek care, the delay in reaching the appropriate care once the decision has been made to seek care and the delay in receiving adequate care after arriving at the health facility, all contribute to maternal mortality. Dynamics in the drivers of these delays and in interventions to ameliorate them and treat the biological causes of maternal death they allow, all contribute to changing trends in maternal mortality [7].

## Methods

### *Review of MMR data in Malawi*

1  
2 We searched for studies concerning maternal mortality in Malawi, primarily via PubMed  
3 and Google Scholar, but also including Demographic and Health Survey (DHS) reports  
4 and those from the United Nations (UN) and World Health Organisation (WHO). The  
5 search term: “(maternal OR pregnancy-related) AND (mortality OR death) AND Malawi”  
6 retrieved 203 articles on PubMed in a final search on 28<sup>th</sup> October 2013. Abstracts were  
7 screened and full-texts retrieved when the abstract indicated data on population-level  
8 maternal mortality – i.e. purely facility-based studies were excluded. This search yielded  
9 4 studies, all reporting sub-national population-based estimates of MMR. All national-  
10 level estimates of MMR were obtained from DHS and Multiple Indicator Cluster Survey  
11 (MICS) reports; and our combined total of over seventy (concurrent) years of experience  
12 working in maternal health in Malawi has not made us aware of any additional studies.  
13 The following information was extracted: date, location and method of survey, case  
14 definition of maternal death, number of maternal deaths and livebirths, and MMR and  
15 confidence intervals (Table 1). Studies containing all of this information and definitions  
16 of maternal death or pregnancy-related death analogous to those stated in the introduction  
17 were considered to be of adequate quality for inclusion in our review. No identified  
18 studies were rejected on quality grounds and there were no disagreements among authors  
19 on which studies to include, or on the data extracted.  
20  
21  
22

23  
24 Two of the data sources for maternal mortality estimates are from prospective population-  
25 based surveillance systems in the central region of Malawi. In both systems, community-  
26 based enumerators collected information about pregnancies, births and deaths, and deaths  
27 were followed up by verbal autopsies conducted by field supervisors. In MaiMwana  
28 project, in Mchinji district, the enumerators were paid staff who reported to field  
29 interviewers and supervisors who followed up with further post-partum interviews [8].  
30 Data was included for control areas of the study (with no interventions), for the period 1<sup>st</sup>  
31 January 2005 to 31<sup>st</sup> January 2009 [9]. In MaiKhanda, in Lilongwe, Salima and Kasungu  
32 districts, the enumerators were volunteers who covered a smaller population each, and  
33 who reported to community health workers, officially referred to as Health Surveillance  
34 Assistants (HSA). Given the lack of an observed effect of the MaiKhanda interventions on  
35 maternal mortality data was included for all areas, for the period 1<sup>st</sup> July 2007 to  
36 31<sup>st</sup> December 2010 [10].  
37  
38

39 Not all of the published studies reported 95% confidence intervals for their estimates, so  
40 these were calculated using the Newcombe-Wilson method without continuity correction  
41 [11]. Data from the 1992 DHS were re-analysed in a study by ORC Macro [12].  
42  
43

44 We estimate the trend in the MMR in Malawi from 1977 to 2010 using the best-fit multi-  
45 term fractional polynomial transformation based on the available population-level data  
46 representing the whole country, using the **fracpoly** command in Stata 13.0 for Mac.  
47 Further details are provided in Web Appendix 1. We compare this trend to that estimated  
48 by recent modelling studies.  
49

### 50 ***Review of drivers of MMR in Malawi***

51 A list of possible variables that could have impacted on MMR in Malawi was drawn up  
52 using results from modelling studies [13 p85 14-16] and relevant overviews [7 17 18].  
53 Literature and internet-based databases were used to obtain data on the levels of each of  
54 the relevant variables in Malawi over the last 35 years. Identified variables were:  
55 percentage of deliveries attended by skilled personnel, percentage of deliveries by C-  
56 Section, Total Fertility Rate (TFR), Gross National Income (GNI) per capita, health  
57 expenditure per capita, life expectancy at birth, female illiteracy rate, HIV prevalence and  
58 access to antiretroviral therapy, political stability, malaria, malnutrition, and variables  
59  
60



1  
2 associated with the accuracy of MMR data collection. The trends in these variables and in  
3 intermediate variables concerned with their mechanisms of action were then compared to  
4 the trends in MMR in order to qualitatively and logically assess whether they might have  
5 contributed to changes in MMR in Malawi. Bivariate and multivariate linear regressions  
6 were run, but a lack of data points reduced the power of these models to detect significant  
7 associations, especially non-linear associations and interaction terms -both of which are  
8 likely given the complex nature of potential causal pathways between the variables and  
9 MMR-, therefore these results are not included. The lack of data points also precluded the  
10 use of multiple imputation to estimate MMR and the effects of the potential predictor  
11 variables for the years with missing data.  
12  
13

14 We used the relative-risk of pregnancy-related mortality in HIV positive compared to HIV  
15 negative women estimated by Calvert and Ronsmans via systematic review and meta-  
16 analysis to be 7.74 [19], to estimate the proportion of the MMR that is due to HIV  
17 depending on the HIV prevalence. We adjusted this proportion downwards from 2003 to  
18 account for the increasing impact of the antiretroviral therapy (ART) programme in  
19 Malawi [20 21]. Further details are provided in Web Appendix 2.  
20  
21  
22  
23

## 24 Results

### 25 *Studies of Population MMR in Malawi*

26 Eleven studies reporting population-based estimates of MMR were found, and one study  
27 contributed four separate estimates [3 22] (Table 1). All DHS and MICS studies, i.e. all of  
28 the studies providing national-level estimates, use pregnancy-related deaths as case-  
29 definitions of maternal deaths to calculate MMR.  
30  
31  
32

### 33 *Trend in national population-based estimates of MMR*

34 Figure 1 plots the MMR of the 8 analyses, each applying to a pre-survey time period of a  
35 number of years, from the 5 surveys representative of the whole of Malawi (the four DHS  
36 surveys and the MICS survey) and the other surveys representative of specific regions of  
37 Malawi (Table 1). It appears that from a low of around 400 in the early 1980s the MMR  
38 rose rapidly throughout the 1980s and early to mid-1990s to a peak of over 1000 maternal  
39 deaths per 100,000 livebirths around 1997. The MMR then fell to around 800 by 2003 and  
40 to an estimated 675 in 2007 [1].  
41  
42

43 Figure 1 plots locally-weighted (Lowess) regression trends for the estimates and 95%CI  
44 of the national-level surveys in black. The best-fit fractional polynomial transformation is  
45 plotted in gold, details of its calculation are provided in Web Appendix 1. A comparison  
46 of this best-fit trend line and recent modelling studies is provided in Table 2. The WHO  
47 estimates of MMR for Malawi, developed by the Maternal Mortality Estimation Inter-  
48 Agency Group (MMEIG) [15] are based on a model fitted for all countries of the world  
49 and therefore may not accurately convey country-specific nuances. This seems very likely  
50 for Malawi as the higher 1990 figure and steady decline (Table 2) seems to ignore the  
51 evidence suggesting a rise in the 1990s followed by a fall in the 2000s (Figure 1). Despite  
52 also being generalised to many countries, a different model developed by the Institute for  
53 Health Metrics and Evaluation (IHME) does capture this rise and fall [16], although they  
54 estimate a much higher peak around the year 2000 than our estimate (Table 2). The  
55 MMEIG and IHME estimates differ as they are obtained from statistical models  
56 containing different covariates. The MMEIG uses Gross Domestic Product per capita  
57 (GDP), General Fertility Rate (GFR) and Skilled Birth Attendance (SBA) [15]. IHME  
58  
59  
60

1  
2  
3  
4  
5  
6  
7  
8  
9  
10  
11  
12  
13  
14  
15  
16  
17  
18  
19  
20  
21  
22  
23  
24  
25  
26  
27  
28  
29  
30  
31  
32  
33  
34  
35  
36  
37  
38  
39  
40  
41  
42  
43  
44  
45  
46  
47  
48  
49  
50  
51  
52  
53  
54  
55  
56  
57  
58  
59  
60

uses analogous measures, but also uses antenatal care coverage, female education by age, ARV-adjusted HIV prevalence, neonatal death rate and malnutrition [16]. In addition, it is unclear whether the IHME estimates are based on exactly the same national-level MMR data sources as the MMEIG estimates (which use DHS and MICS), because the sources of the expanded set of sibling history data used by IHME are not disclosed in their paper or web appendix [16]. Our best-fitting estimate only uses national-level MMR data by year without using any additional covariates.

### ***Trend in estimates of MMR in Central Region of Malawi***

Data from prospective surveillance of populations in Mchinji (MaiMwana) and Salima, Lilongwe and Kasungu (MaiKhanda) give MMRs of 585 for MaiMwana during 2005-8 and 299 for MaiKhanda during 2007-10 (Table 1; Figure 1). These numbers, which are based on obstetric deaths, are lower than the most recent national estimates from DHS and MICS reports, which are based on pregnancy-related deaths (Table 1). This may, however, also reflect lower MMR in the Central Region of Malawi, which was estimated to be 678, compared to the national estimate of 807 in the MICS report, during 2000-6 (Table 1). Although this difference is not statistically significant (the 95% confidence intervals overlap), the 2006 MICS reports the Central and Northern regions of Malawi to have significantly lower MMR than the Southern region [23] (Table 1). Comparison of DHS data by region was not possible because the place of exposure and death of the respondents' sisters who died is not recorded [24].

### ***Variables linked to changes in MMR***

Figure 2 conceptualises potential drivers of maternal mortality in Malawi. These linkages, and the evidence supporting them, are described below. Table 3 accompanies this analysis by examining how trends in each of the explanatory variables relate to the estimated trend of maternal mortality.

### **Skilled Birth Attendance, Caesarean Section and Emergency Obstetric Care**

The proportion of women attended by a skilled health professional at delivery has changed very little over the majority of the period in question, so is unlikely to have contributed to the observed changes in MMR. Similarly, although home deliveries attended by relatives or friends have decreased, they appear to have shifted to deliveries by Traditional Birth Attendants (TBA) resulting in a similar proportion of deliveries remaining unskilled during all but the most recent years of the period in question (Table 3). The DHS 2010 results [1] show that skilled birth attendance increased to 71% in the 6 years to 2010 however, whilst MMR fell to 675. This is encouraging, however further declines in maternal mortality could perhaps be possible if it were not for the overcrowding of facilities and the fact that human and material resources for health have not kept pace with the recent rapid rise in women delivering at facilities [25].

The lack of association of SBA with MMR questions the validity of the indicator 'delivery by a skilled birth attendant' as a proxy for MMR, especially on consideration that many Asian countries have achieved a lower MMR with much lower skilled attendance at birth e.g., Bangladesh [26 27] and Nepal [28 29]. It is also possible that both the actual level of skills and knowledge of the attendants and the ability of the surrounding environment (e.g. drugs and supplies) to ensure the possibility of truly skilled attendance including provision of basic and comprehensive emergency obstetric care has altered significantly over the period in question [30]. However, there is insufficient data to determine whether such changes took place in Malawi. In addition, there has been no adequate verification of the reporting of attendance by nurses, midwives and doctors

(taken by the DHS to be 'skilled attendance') by the women surveyed to arrive at these statistics [30 31].

Remaining below the WHO recommended minimum level of 5%, the Caesarean Section rate in Malawi has been consistently low throughout the last 20 years (Table 3). It is therefore unlikely to be associated with the observed trends in MMR. It is also important to note that we are unaware of the indications of these C-sections and in particular whether they were undertaken for live-saving purposes. When the population based C-section rate is low it should, however, be done to save women's lives [32]. Health facility delivery is high in Malawi but, according to the latest national assessment, 39% of facility deliveries take place in health centres, which are poorly resourced, whilst 61% take place in hospitals; and the referrals of complicated cases either from home or from health centres to hospitals where blood and surgery is available is not always efficient [33]. Most C-sections in Malawi are performed by clinical officers, not by obstetricians or doctors. However, studies have revealed that clinical officers are comfortable [34] and competent [35 36] performing such operations.

### **Fertility and Family planning**

The Total Fertility Rate (TFR) may have an impact on maternal mortality, as women of high parity are at increased risk of potentially fatal maternal complications [37] and the lifetime risk of maternal death increases with the greater the number of times a woman is exposed to pregnancy and childbirth. However, from 1982 to 2003 the TFR has changed little in comparison to the change in MMR and in fact even dropped slightly in the 1980s and 1990s while the MMR was increasing (Table 3), therefore it is unlikely to be related to the observed trend in MMR in Malawi. The slight reduction in TFR has not impacted on the rate of population growth in Malawi, which contributes to overburdening the health system.

Family planning methods, if accepted by a large proportion of the population, and if used continuously over prolonged periods, reduce fertility rates and consequent maternal deaths and thus contribute to reducing MMR. Family planning reduces MMR by reducing the total number of pregnancies (parity) as well as the number of unintended, unwanted and untimely pregnancies, which are often high risk [38]. Reducing unwanted pregnancies will reduce induced abortions. Abortions are estimated to be the cause of between 5% and 18% of maternal deaths according to a range of primarily hospital-based studies assessed by Bowie and Geubbels [7]. Safe abortion in Malawi is only permitted where the life of the mother is threatened; such restrictive abortion laws have not been shown to reduce maternal mortality anywhere. Success in family planning also brings about a shift in risk groups from high parity to low parity and from older age to younger age [37] but the impact of this shift on the MMR is possibly small [39].

Although the contraceptive prevalence rate has increased over the last 20 years, this has not resulted in large changes in total fertility. Maternal mortality increased during the period of increasing contraceptive use, so they are unlikely to be related. However, it's possible that sustained gains in contraception use during the last decade, when HIV was less of a contributor to MMR (Figure 1), could have reduced MMR.

### **Gross National Income per capita**

GNI per capita is consistently very low throughout the whole period and is unlikely to have contributed to significant improvements in maternal health. Given the history of maternal mortality in industrialised countries in the first half of the twentieth century it is also unlikely that recent increase in GNI will have contributed to the recent reduction in

1  
2  
3  
4  
5  
6  
7  
8  
9  
10  
11  
12  
13  
14  
15  
16  
17  
18  
19  
20  
21  
22  
23  
24  
25  
26  
27  
28  
29  
30  
31  
32  
33  
34  
35  
36  
37  
38  
39  
40  
41  
42  
43  
44  
45  
46  
47  
48  
49  
50  
51  
52  
53  
54  
55  
56  
57  
58  
59  
60

MMR, unless it led to improvements in the empowerment of women to make decisions, transport, and the availability of high-quality obstetric care [6 7].

### **Health expenditure**

The trend in MMR may be related to the trend in health expenditure (Table 3). Due to an economic slump in 1994/95 government health spending was reduced, and although cushioned by increases in donor funding, still dropped from 45.1 Malawi Kwacha (MKW) per capita in 1994 to 40.9MKW per capita in 1998 [40] at a time when the MMR was increasing rapidly. Also, both total (government, private and individual) and government per capita health expenditure has increased in recent years, whilst the MMR has gone down.

### **Female Literacy and Education**

Female literacy is an indicator of formal education, and is known to be associated with lower MMR through increased knowledge of family planning and lower fertility, and increased knowledge of danger signs of pregnancy and the importance of skilled delivery [40]. At 79.7%, female literacy is higher in the Northern region of Malawi, than either the Central region (64.5%) or the Southern region (67.5%) [1]. Despite maternity services being more sparsely distributed and under more hostile terrain the MMR is lower in northern Malawi [23], perhaps due to the higher female literacy. For the country as a whole, there have been recent gains in adult female literacy and similar gains in the percentage of females going to secondary school (Table 3), which may be related to recent declines in MMR. However, the increasing maternal mortality in the 1990s was not mirrored by declining female literacy, and the effect of literacy on MMR may follow a significant time lag – enough for other changes intermediate to reduced MMR to manifest. Such results of improved female education could include changes in family and community dynamics that give women increased agency and control over their lives [41].

It may also be that there is a threshold level of female literacy that has to be surpassed in order for it to translate as reductions in maternal mortality via the catalysis of improved knowledge of pregnancy danger signs and the importance of skilled attendance at delivery. Above such a threshold a critical mass of knowledge may be reached within the poor communities of Malawi that contribute the most towards its high MMR.

### **Female Life Expectancy at birth**

Life expectancy at birth is an accurate proxy measure of the overall health of the population and therefore could also be an accurate predictor of maternal mortality [13]. From the available data the slight fall in female life expectancy during the 1980s and 1990s does match the rise in MMR during the same period and the rise in life expectancy in the early 2000s also matches the fall in MMR during this time, however the trends in life expectancy are less marked (Table 3). The fact that the proportion of adult female deaths that were from maternal causes appears to have remained fairly constant, varying between 21.6% and 15.6% during 1986 to 2010 (Table 3), strengthens the case for an association between MMR and female life expectancy in Malawi. This association is plausible given that in Malawi, female life expectancy is dependent on a number of factors such as HIV and other diseases that are also linked to maternal mortality.

### **Adult Female Mortality**

Adult Female Mortality (AFM) follows the same trend as MMR. This is not surprising considering that MMR is a subset of AFM as determined by the sisterhood method used in the DHS and MICS. Given that AFM is around 5 times higher than MMR there is a large scope for the MMR to be inflated by misclassification of non-maternal adult female



1  
2 deaths as maternal. Sisterhood methods estimate 'pregnancy-related' deaths during  
3 pregnancy and up to two months post-partum, irrespective of the cause. In Bolivia, where  
4 AFM was around 11 per 1000 person-years between 1975-1988, the number of non-  
5 obstetric deaths included in MMR estimates using sisterhood methods was estimated by  
6 Stecklov to be over 30% [42]. Garenne recently improved Steklov's method by including  
7 an HIV-prevalence-adjusted estimate of the relative-risk of non-obstetric mortality during  
8 the maternal risk period compared with the risk of mortality outside this period, and  
9 estimates the proportion of non-obstetric deaths included in the MMR for the Malawi  
10 DHS surveys to be 57% for 1992, 54% for 2000 and 62% for 2004, resulting in estimated  
11 obstetric MMRs of 299, 562 and 410, respectively [43]. A similar upward followed by  
12 downward trend is therefore observed for this estimate of obstetric mortality as well as for  
13 pregnancy-related mortality (which was estimated to be 10-15% higher using Garenne's  
14 method than the MMR published in the DHS reports). Because the proportion of  
15 pregnancy-related deaths in HIV positive women that are incidental deaths and the  
16 remaining proportion that are indirect obstetric deaths remains unknown [15], these  
17 estimates of obstetric MMR could be conservative. Failure to differentiate between  
18 maternal and non-maternal deaths may lead to inaccurate conclusions about trends and  
19 impact of public health interventions, as well as inadequate future interventions [44].  
20 Disregarding potential misclassification bias, the DHS figures show MMR to have  
21 declined by an estimated 31% (from 984 to 675 maternal deaths per 100,000 livebirths)  
22 and AFM to have declined by an estimated 28% (from 11.6 to 8.4 deaths per 1000 women  
23 aged 15-49) between the 2004 survey and the 2010 survey [1 45]. Although the MMR  
24 decline appears slightly larger, suggesting a reduction in direct obstetric maternal deaths -  
25 as also suggested by application of Garenne's method- in addition to a reduction in  
26 HIV/AIDS-related maternal deaths (see below), given wide confidence intervals, we are  
27 not able to conclude that this was the case.  
28  
29  
30  
31

### 32 HIV, AIDS and ART

33 Figure 1 shows that the estimated MMR due to HIV rises dramatically during the 1990s  
34 both in absolute terms and as a proportion of the total MMR as the HIV prevalence rises  
35 (Table 3). As the HIV prevalence levels off around the year 2000 and begins to slowly  
36 decline (Table 3) and incidence also declines [46], the proportion of MMR due to HIV  
37 slowly declines, declining more rapidly towards 2010 as the effect of the antiretroviral  
38 therapy programme takes hold [20 21]. The following paragraphs discuss the relationship  
39 between HIV and MMR in Malawi with reference to how it was calculated, biological  
40 plausibility and cause-specific mortality, regional variations, and the recent effect of the  
41 antiretroviral therapy programme.  
42  
43

44 The trend in MMR due to HIV depends on the HIV prevalence, the relative-risk (RR) of  
45 pregnancy-related mortality in HIV+ mothers compared to HIV- mothers [19] and impact  
46 of ART from 2004 onwards [20 47 48]. Further detail and explanation of the calculations  
47 involved are provided in Web Appendix 2. Although the RR of 7.74 is from a systematic-  
48 review and meta-analysis of 23 studies that were mainly facility-based [19], it is  
49 corroborated by a secondary analysis of population-based longitudinal cohort data from  
50 sub-Saharan Africa that estimates it to be 8.2 [49]. The fact the RR is for pregnancy-  
51 related mortality rather than maternal mortality is less of an issue given that the DHS and  
52 MICS estimates used to construct the trend line to which the RR is applied effectively  
53 measure pregnancy-related rather than maternal mortality. This also negates the issue of  
54 maternal deaths due to HIV not being formally recorded pre-2010, before the importance  
55 of HIV as an indirect cause of maternal death was recognised by the creation of  
56 International Classification of Diseases 10 (ICD10) code O98.7 [4]. Recent evidence from  
57 South Africa suggests HIV mortality is lower in pregnant women than age-matched non-  
58  
59  
60

1  
2 pregnant women indicating that many HIV deaths may be co-incidental with pregnancy  
3 [50]. Nevertheless, it remains not possible to separate out indirect obstetric deaths due to  
4 HIV and incidental HIV deaths. All are captured, however, in the national-level  
5 pregnancy-related mortality MMR trends presented in this paper. The estimated  
6 proportion of MMR attributable to HIV takes no account of the effect of the HIV  
7 epidemic on the health system of Malawi, however, which includes exacerbation of the  
8 human resource crisis [51], and possibly also de-prioritisation of other health problems  
9 such as maternal health. Therefore it is likely to be an underestimate.  
10

11  
12 Although HIV reduces the rate of conception resulting in fewer pregnancies, it is likely to  
13 increase maternal mortality due to a combination of: increases in direct obstetric deaths  
14 (due to increases in puerperal sepsis for example); increases in indirect obstetric deaths  
15 (due to complications of HIV aggravated by pregnancy); and, decreases in the quality of  
16 care available to all mothers as a result of less trained health workers being available at  
17 health facilities (as many die from AIDS) and a more prejudicial attitude of health  
18 workers towards those who they suspect of having HIV [52].  
19

20  
21 If HIV were responsible for an increase in maternal deaths we would expect cause-  
22 specific mortality rates to reflect this. While few studies have had the capacity to verify  
23 maternal HIV status, the proportion of deaths due to infections such as puerperal sepsis  
24 and malaria [53] may be related to HIV. Hospital-based studies have shown an increase in  
25 the proportion of maternal deaths due to puerperal sepsis from 6/78 (8%) in 1989 and  
26 13/37 (18%) in 1990) [54] to 29% in 2005 [55]; both studies also finding HIV/AIDS  
27 (11% and 10% of maternal deaths in 1989 and 1990 respectively [54], percentage not  
28 stated in 2005 study) and other infections to be important contributors. A review of 43  
29 maternal deaths in hospitals in the central region in 2007 showed 16% were due to sepsis  
30 and attributed a further 16% to AIDS [56]. A recent study of 61 maternal deaths in a  
31 central region hospital during 2007-2011 found 12 (20%) were HIV positive, 10 of whom  
32 died of non-pregnancy-related infections including meningitis and pneumonia [57]. Such  
33 non-pregnancy-related infections would be included in the pregnancy-related mortality  
34 MMR trends presented in this paper. Another recent study of 32 maternal deaths in a  
35 tertiary hospital in Malawi in 2011 found 13 (40%) of the women were HIV positive, 9  
36 HIV negative and 10 with unknown HIV status; and classified 6 (19%) of the maternal  
37 deaths as due to sepsis and a further 3 (9%) due to HIV-related disease [58]. HIV  
38 infection may also predispose pregnant women to more severe malarial morbidity [59-61],  
39 but data related to trends in malaria-related maternal complications are limited.  
40  
41

42  
43 As noted earlier, the MMR in the Northern and Central Regions of Malawi was  
44 significantly lower than that in the Southern Region of Malawi between 2000-6 [23]. In  
45 2004, HIV prevalence was also significantly lower in these regions, with 10.4% (95%CI:  
46 7.8%, 13.8%), 6.6% (5.2%, 8.3%) and 19.8% (17.7%, 22.1%) in Northern, Central and  
47 Southern Regions respectively [45]. The trend in the MMR in urban and rural areas of  
48 Malawi between the first DHS survey (1986-1992) and the second DHS survey (1994-  
49 2000) was examined by Bicego and colleagues [62]. They found that the increases in  
50 MMR were statistically significant and concluded that they were related to increases in  
51 HIV during the same period.  
52

53  
54 There is now growing evidence from Malawi and elsewhere in sub-Saharan Africa that  
55 the population-level effect of ART is significant in reducing adult mortality rates [47].  
56 The Malawian government Ministry of Health launched a national program providing free  
57 access to ART in 2004. By mid-2010, 359,771 people had been registered on ART,  
58 345,765 in the public sector [48], and there had been a rapid fall in mortality [20].  
59  
60



1  
2  
3  
4  
5  
6  
7  
8  
9  
10  
11  
12  
13  
14  
15  
16  
17  
18  
19  
20  
21  
22  
23  
24  
25  
26  
27  
28  
29  
30  
31  
32  
33  
34  
35  
36  
37  
38  
39  
40  
41  
42  
43  
44  
45  
46  
47  
48  
49  
50  
51  
52  
53  
54  
55  
56  
57  
58  
59  
60

Therefore part of the reason for the decline in MMR in Malawi after 2003 may have been the successful scaling-up of the ART program and a consequent reduction in direct and indirect maternal deaths related to HIV and AIDS. However, the main impact of ART is likely to have occurred later as it's roll-out only became significant from 2005, with coverage reaching 25-50% by 2007-2009 [46]. Although, as detailed in Web Appendix 2, the proportion of HIV positive women on ART needs to increase from the 35% observed in 2010 [63] for there to be more of an impact. Recent reports show a large increase to 69% in the last quarter of 2012 however [64], and the adoption of 'Option B+' of treating all HIV positive pregnant women with antiretrovirals for life since 2011 shows great promise [21].

### **Malaria and Anaemia**

Malaria in pregnancy has been linked to low birth weight and adverse outcomes for the baby and severe antenatal anaemia in the mother, and anti-malarial prophylaxis is recommended, especially for low parity women [7]. Anaemia may also be unrelated to malaria, being also the result of other infections such as hookworm or HIV, or nutritional deficiencies, for example [65]. Facility-based studies in Malawi have estimated anaemia to cause 7% of 43 maternal deaths [56], 12% of 165 maternal deaths [25]<sup>p140</sup>, 16% of 32 maternal deaths [58] and 17% of 61 maternal deaths [57]. With regard to Malaria, although studies in other malaria endemic countries have linked seasonal trends in maternal mortality to seasonal trends in malaria incidence [66 67], and a recent study in Kenya estimated 9% of 249 pregnancy-related deaths were due to malaria [68], the contribution of malaria to maternal mortality in Malawi remains unclear. Malaria control measures have increased in Malawi during the last decade of unchanged malaria transmission but have yet to reduce hospital admissions due to malaria in children [69 70]. Current prophylaxis measures in pregnant women in Malawi may be insufficient too [71], suggesting the observed trend in maternal mortality in Malawi is unlikely to be due to changes in malaria or its prevention or treatment.

### **Nutrition and stunting**

Under-nutrition during childhood and adolescence leads to stunting which puts women at risk of prolonged and obstructed labour and consequent ruptured uterus and haemorrhage, important causes of maternal mortality in Malawi [7]. The proportion of maternal deaths due to stunting remains unclear, however. Therefore the extent to which longitudinal improvements in nutritional status could reduce maternal mortality is unknown. Given the proportion of women with short stature has changed little (Table 3), stunting is unlikely to have played a major role in the observed rise and fall in MMR in Malawi.

## **Discussion**

National estimates of maternal mortality in Malawi show a rising trend throughout the 1980s and 1990s reaching a peak in the late 1990s from which it started to decline. Maternal mortality is difficult to measure accurately, and therefore the trends observed must be interpreted with caution. However, some measure of change is necessary for monitoring progress towards achieving the MDG for maternal health. Understanding what has contributed to the rise and fall of maternal mortality is also crucial. We hope this paper goes some way towards explaining both for the case of Malawi.

### ***Why is the Maternal Mortality Ratio falling?***

1  
2  
3  
4  
5  
6  
7  
8  
9  
10  
11  
12  
13  
14  
15  
16  
17  
18  
19  
20  
21  
22  
23  
24  
25  
26  
27  
28  
29  
30  
31  
32  
33  
34  
35  
36  
37  
38  
39  
40  
41  
42  
43  
44  
45  
46  
47  
48  
49  
50  
51  
52  
53  
54  
55  
56  
57  
58  
59  
60

A paper by Muula and Phiri seeking to explain the rise in MMR between the 1992 and 2000 DHS speculated that deterioration in health services resulting from the rise in HIV during this period (and the rise in HIV itself) were possibly to blame for the apparent 80% increase in MMR during this period [72]. The evidence we present in this paper suggests that the declining impact of HIV in Malawi may have contributed to the recent fall in maternal mortality. Muula and Phiri also speculated that an increase in poverty during the 1990s could have contributed to an increase in MMR [72]. Malawi's economy has been more successful in recent years (Table 3) and poverty has perhaps decreased as a result [73]. Thus recent declines in maternal mortality could be related in part, to poverty reduction. However, the level of economic improvement required to drive a reduction in maternal mortality in Malawi remains unclear.

The functioning of the health system is key. Although the proportion of women whose delivery was attended by a skilled health-worker has only changed in recent years, the competency of the health system may have changed throughout the last three decades. An audit of maternal deaths in the Southern Region concluded that the quality of obstetric care went down in Malawi in the 1990s [74] and in general it is perceived that the health system deteriorated significantly during the 1990s. Although infant mortality may have decreased slightly in the 1990s, other indicators of health system performance such as vaccination rates, pneumonia treatment and stunting got worse in the 1990s [3 75 76]. Reasons for this decline in quality included: the human resources crisis - overseas migration of nurses and midwives peaked in the late 1990s, internal rural to urban migration and HIV were also responsible for declining numbers of key obstetric health workers [51]; a closure of rural facilities - some of which have since reopened following the 2004-2010 emergency human resources plan, although the Hardship Allowance for attracting staff to rural areas was not implemented [77]; declining standards in schools resulting in insufficient candidates to fill nursing and medical schools; and, a lack of capable, efficient and un-corrupt leadership/strategic planning [40]. Some of these factors have improved in the last decade and could therefore be responsible for the turnaround in MMR. Other improvements were also made since the launch of the Safe Motherhood programme in the southern region in 1997 including more health education talks and information on safe motherhood [78], and initiatives to quicken referrals from rural health centres to hospitals [79 80]. Indicators of health system performance such as vaccination rates, pneumonia treatment and the proportion of under-5 children who are underweight or stunted have also improved in the last decade [3 75 76].

The Sector Wide Approach (SWAp) of 2004-2010, and increased per capita health funding (Table 3), has enabled increased coordination, investment, and provision of essential healthcare [81], including some increases in nursing and other staff resulting from the Emergency Human Resources Plan [77]. However, provision of maternity care was still less than half of what was required [81] and additional recent data suggests obstetric care services are still lacking in Malawi, especially at the peripheral health centre level ([33 82]), and shortages of staff and supplies are still acute [83]. The MMR would decline further if access to both basic and comprehensive emergency obstetric care could be improved further along with skilled attendance for all deliveries [33]. Clearly there is much still to do; but not just for poor rural women.

#### ***Urban, rural, richer, poorer***

The lower recent estimates from the MaiMwana and MaiKhanda population-based surveillance may also be partly due to the exclusion of urban populations in these studies [9 10]. Most health indicators in Malawi are better in urban areas [1 23 45], but Bicego *et al* suggest that urban maternal mortality became higher than rural maternal mortality

1  
2 between the 1992 and 2000 DHS [62], and MICS 2006 reports slightly higher MMR in  
3 urban than in rural areas (Table 1), although also with widely overlapping confidence  
4 intervals. If true, this may be partly due to higher HIV prevalence in urban areas [62 84],  
5 and partly due to the loss of 'urban advantage' in maternal health now arising in urban  
6 populations in developing countries [85], although a lack of access to skilled delivery in  
7 rural areas would be expected to counterbalance the lower HIV-related maternal  
8 mortality. A flattening of the socioeconomic gradient for maternal and child mortality has  
9 been seen in Malawi and other countries with high HIV prevalence, with higher mortality  
10 in low socioeconomic groups due to lack of access to health care and higher mortality in  
11 high socioeconomic groups due to HIV [86 87].

### ***Policy Implications: Reaching MDG5 in Malawi***

14  
15 Assuming the MMR in 1990 was 620 (95% CI 410-830) [3], then the MDG 5 targeted  
16 75% reduction for Malawi would mean an MMR of 155 (103-208) by 2015 [2 88].  
17 Alternatively, using the time trend analysis from this paper (Figure 1), MMR for 1990  
18 was approximately 750 (95% CI 550-950) corresponding to an MDG 5 target of 190 (95%  
19 CI: 140-240) by 2015. Despite these uncertainties as to what the MDG 5 target should be  
20 (the Countdown 2012 report sets the target for Malawi at 280 [76], basing it on the 1990  
21 estimate of 1100, which we dispute), it is clear that meeting the target will be difficult. It  
22 is often easier to reduce mortality from a high level to a less high level than from a low  
23 level to an even lower level. Meeting MDG5 in Malawi will also be difficult because of  
24 the rapid increase in MMR during the 1990s, possibly as a result of HIV. Both prevention  
25 and treatment of HIV are therefore also priorities in the fight against maternal mortality  
26 [89] and it is good to know that progress is now being made on both fronts [64]. If many  
27 of the extra deaths in the 1990s were due to HIV (either as incidental deaths or indirect  
28 maternal deaths complicated by HIV-disease, the two of which are difficult to distinguish  
29 [90]), greater reductions in direct obstetric maternal deaths are crucial. However, the  
30 target for attaining the 75% reduction is likely to be measured using similar sisterhood  
31 methods to the DHS and MICS, which will not adequately distinguish between  
32 pregnancy-related mortality and maternal mortality, whether due to HIV or otherwise.  
33  
34  
35  
36

37 Translating the recent increase in institutional delivery in Malawi into increased quality of  
38 routine and emergency care during and after delivery must be prioritised as part of  
39 continued efforts towards the strengthening of the health system in Malawi [25 33].  
40 Prevention of maternal deaths through an increased focus on family planning and  
41 liberalising safe abortion services, and improving the timeliness of referrals from homes  
42 and health centres should also be priorities [27].  
43  
44  
45  
46

## **Conclusion**

47  
48 From the best available evidence it appears that fewer mothers are dying in pregnancy,  
49 childbirth and the post-partum period in Malawi in recent years and that this is possibly  
50 the result of: increases in health facility delivery; improvements in the financing and  
51 management of the health system contributing to real gains in skilled delivery (in terms of  
52 the knowledge and skill of the increasingly available professionals involved and an  
53 enabling environment); improvements in awareness of women of danger signs of  
54 pregnancy, catalysed through increased adult female literacy in recent years; and, more  
55 recently, a reduction of HIV-related maternal mortality via a rapid roll-out of  
56 antiretroviral therapy. Despite this it must be stressed that at around 400 maternal deaths  
57 per 100,000 livebirths the MMR in Malawi is still unacceptably high and much remains to  
58  
59  
60

1  
2  
3  
4  
5  
6  
7  
8  
9  
10  
11  
12  
13  
14  
15  
16  
17  
18  
19  
20  
21  
22  
23  
24  
25  
26  
27  
28  
29  
30  
31  
32  
33  
34  
35  
36  
37  
38  
39  
40  
41  
42  
43  
44  
45  
46  
47  
48  
49  
50  
51  
52  
53  
54  
55  
56  
57  
58  
59  
60

be done to prevent maternal complications arising and improve the provision of obstetric care in the country. Considerable effort is required if Malawi is to achieve MDG 5 by having an MMR of 150 or less by the end of 2015 and if more mothers are going to survive in the coming years.

#### **Funding**

This research received no specific grant from any funding agency in the public, commercial or not-for-profit sectors. TC and BN were funded by The Health Foundation from 2007 to 2011, and funded by the European Union, Bill and Melinda Gates Foundation, UK government Department for International Development (DFID) and the Wellcome Trust from 2011 onwards. SL was funded by DFID and the Wellcome Trust. IA was funded by the London School of Hygiene and Tropical Medicine.

#### **Conflict of Interest**

All authors have no conflicts of interest

#### **Author contributions**

TC conceived the study, carried out the literature review, gathered the data, carried out the analyses, contributed to their interpretation, wrote the first draft of the paper, and collated inputs to all subsequent drafts. SL contributed to the analysis and interpretation and revised the paper. BN, IA, AP and CM contributed to the interpretation of the analyses and added clinical and health systems perspectives to the narrative. AP and CM also added insights from their many years working in the Malawian health system. All authors reviewed and revised several iterations of the paper, contributed intellectual content and have seen and approved the final version of the paper.

#### **Acknowledgement**

We thank Michel Garenne for his detailed and insightful review and suggestions, which improved the paper.

#### **Data Sharing**

All of the data used in this study have been previously published.

## References

1. National Statistical Office (NSO), ICF Macro. Malawi Demographic and Health Survey 2010. Zomba, Malawi, and Calverton, Maryland, USA: NSO and ICF Macro, 2011.
2. UN. Millenium Development Goal 5: Improve Maternal Health. Available at <http://www.un.org/millenniumgoals/maternal.shtml> (last accessed 29/10/2013).
3. National Statistics Office Malawi, Macro International USA. Malawi Demographic and Health Survey 1992. Calverton, Maryland: NSO and Macro International Inc., 1994.
4. WHO. International statistical classification of diseases and related health problems. 10th Revision. Vol. 2. Instruction Manual. 2010 Edition. Geneva: World Health Organisation, 2010:134.
5. Khan KS, Wojdyla D, Say L, et al. WHO analysis of causes of maternal death: a systematic review. *Lancet* 2006;**367**(9516):1066-74 doi: 10.1016/S0140-6736(06)68397-9[published Online First: Epub Date].
6. Thaddeus S, Maine D. Too far to walk: maternal mortality in context. *Social Science & Medicine* 1994;**38**(8):1091-110
7. Bowie C, Geubbels E. Chapter 5 – The epidemiology of maternal mortality 2nd edition. The Epidemiology of Malawi. available at: [http://www.medcol.mw/commhealth/publications/epi\\_book/Maternal\\_health\\_v2\\_2.pdf](http://www.medcol.mw/commhealth/publications/epi_book/Maternal_health_v2_2.pdf) (accessed 29/10/2013): Department of Community Health, College of Medicine, Malawi, 2013.
8. Lewycka S, Mwansambo C, Kazembe P, et al. A cluster randomised controlled trial of the community effectiveness of two interventions in rural Malawi to improve health care and to reduce maternal, newborn and infant mortality. *Trials* 2010;**11**:88 doi: 10.1186/1745-6215-11-88[published Online First: Epub Date].
9. Lewycka S, Mwansambo C, Rosato M, et al. Effect of women’s groups and volunteer peer counsellors on rates of mortality, morbidity and health behaviours in mothers and children in rural Malawi (MaiMwana): a factorial, cluster-randomised controlled trial. *Lancet* 2013;**381**:1721-35
10. Colbourn T, Nambiar B, Bondo A, et al. Effects of quality improvement in health facilities and community mobilisation through women’s groups on maternal, neonatal and perinatal mortality in three districts of Malawi: MaiKhanda, a cluster randomised controlled effectiveness trial. *International Health* 2013;**5**(3):180-95
11. Newcombe RG. Interval estimation for the difference between independent proportions: comparison of eleven methods. *Statistics in Medicine* 1998;**17**(8):873-90
12. Stanton C, Abderrahim N, Hill K. An assessment of DHS maternal mortality indicators. *Studies in Family Planning*.31(2):111-23 2000
13. Hakkert R. Country estimates of maternal mortality: an alternative model. *Statistics in Medicine* 2001;**20**:3505-24
14. Buor D, Bream K. An Analysis of the Determinants of Maternal Mortality in Sub-Saharan Africa. *Journal of Women's Health* 2004;**13**(8):926-38
15. WHO, UNICEF, UNFPA, et al. Trends in Maternal Mortality: 1990 to 2010. Geneva: World Health Organisation, 2012.
16. Lozano R, Wang H, Foreman K, et al. Progress towards Millennium Development Goals 4 and 5 on maternal and child mortality: an updated systematic analysis. *Lancet* 2011;**378**:1139-65
17. Ronsmans C, Graham WJ, on behalf of The Lancet Maternal Survival Series steering group. Maternal Mortality: who, when, where, why. *Lancet* 2006;**368**:1189-200



18. Campbell OMR, Graham WJ, The Lancet Maternal Survival Series steering g. Maternal Survival 2. Strategies for reducing maternal mortality: getting on with what works. *Lancet* 2006;**368**(1284):1299
19. Calvert C, Ronsmans C. The contribution of HIV to pregnancy-related mortality: a systematic review and meta-analysis. *AIDS* 2013;**27**:Feb 25 [Epub ahead of print]
20. Mwangomba B, Zachariah R, Massaquoi M, et al. Mortality Reduction Associated with HIV/AIDS Care and Antiretroviral Treatment in Rural Malawi: Evidence from Registers, Coffin Sales and Funerals. *PLoS One* 2010;**5**(5):e10452
21. Fasawe O, Avila C, Shaffer N, et al. Cost-Effectiveness Analysis of Option B+ for HIV Prevention and Treatment of Mothers and Children in Malawi. *PLoS One* 2013;**8**(3):e57778
22. Stanton C, Abderrahim N, Hill K. DHS Maternal Mortality Indicators: An Assessment of Data Quality and Implications for Data Use. Calverton Maryland: Macro International Inc., 1997.
23. National Statistics Office [Malawi], UNICEF. Malawi Multiple Indicator Cluster Survey 2006, Final Report. Lilongwe, Malawi: National Statistical Office and UNICEF, 2008.
24. Rutstein SO, Rojas G. Guide to DHS Statistics. Calverton, Maryland, USA: Demographic and Health Surveys, ORC Macro, 2006.
25. Colbourn T, Nambiar B, Costello A. MaiKhanda - Final evaluation report. The impact of quality improvement at health facilities and community mobilisation by women's groups on birth outcomes: an effectiveness study in three districts of Malawi. Available at <http://www.health.org.uk/publications/maikhanda/> (accessed 29/10/2013). London: The Health Foundation, 2013:1-364.
26. National Institute of Population Research and Training (NIPORT) OM, University JH, B. I. Bangladesh Maternal Health Services and Maternal Mortality Survey 2001. Dhaka, Bangladesh and Calverton, Maryland (USA): NIPORT, ORC Macro, Johns Hopkins University, and ICDDR,B., 2003.
27. Anwar ATMI. Case studies to understand variations in levels of maternal mortality between Bangladesh and Malawi. Doctoral thesis. London School of Hygiene and Tropical Medicine (LSHTM), 2012.
28. Suvedi, Krishna B, A. P, et al. Nepal Maternal Mortality and Morbidity Study 2008/2009: Summary of Preliminary Findings. Kathmandu, Nepal: Family Health division, Department of Health Services, Ministry of Health, Government of Nepal, 2009.
29. Ministry of Health and Population (MOHP) [Nepal], New ERA, ICF International Inc. Nepal Demographic and Health Survey 2011. Kathmandu, Nepal: Ministry of Health and Population, New ERA, and ICF International, Calverton, Maryland., 2012.
30. Graham WJ, Bell JS, Bullough CHW. Can skilled attendance at delivery reduce maternal mortality in developing countries. *Studies in HSO&P* 2001;**17**(97):130
31. Harvey SA, Blandón YCW, McCaw-Binns A, et al. Are skilled birth attendants really skilled? A measurement method, some disturbing results and a potential way forward. *Bulletin of the World Health Organisation* 2007;**85**(10):783-90
32. Ronsmans C, Van Damme W, Filippi V, et al. Need for caesarean sections in west Africa. *Lancet* 2002;**359**:974
33. Republic of Malawi Ministry of Health. Malawi 2010 EmONC Needs Assessment Final Report, 2010.
34. van Amelsfoort JJ, van Leeuwen PA, Jiskoot P, et al. Surgery in Malawi--the training of clinical officers. *Tropical Doctor* 2010;**40**(2):74-76
35. Wilhelm TJ, Thawe IK, Mwatibu B, et al. Efficacy of major general surgery performed by non-physician clinicians at a central hospital in Malawi. *Tropical Doctor* 2011;**41**(2):71-75



- 1  
2  
3  
4  
5  
6  
7  
8  
9  
10  
11  
12  
13  
14  
15  
16  
17  
18  
19  
20  
21  
22  
23  
24  
25  
26  
27  
28  
29  
30  
31  
32  
33  
34  
35  
36  
37  
38  
39  
40  
41  
42  
43  
44  
45  
46  
47  
48  
49  
50  
51  
52  
53  
54  
55  
56  
57  
58  
59  
60
36. Chilopora G, Pereira C, Kamwendo F, et al. Postoperative outcome of caesarean sections and other major emergency obstetric surgery by clinical officers and medical officers in Malawi. *Human Resources for Health* 2007;**5**:17
37. Chowdhury M, Ahmed A, Kalim N, et al. Causes of maternal mortality decline in Matlab, Bangladesh. *Journal of Health, Population & Nutrition*. 2009;**27**(2):108-23
38. Winikoff B, Sullivan M. Assessing the role of family planning in reducing maternal mortality. *Studies in Family Planning*. 18(3):128-43 1987:Jun
39. Cleland J, Bernstein S, Ezeh A, et al. Family planning: the unfinished agenda. *Lancet* 2006;**368**:1810-27
40. McCoy D, Ashwood-Smith H, Ratsma E, et al. Going from bad to worse: Malawi's maternal mortality. An analysis of the clinical, health systems and underlying reasons, with recommendations for national and international stakeholders: Commissioned by Task Force 4 of the UN Millenium Project, 2004.
41. Karlsen S, Say L, Souza J-P, et al. The relationship between maternal education and mortality among women giving birth in health care institutions: Analysis of the cross sectional WHO Global Survey on Maternal and Perinatal Health. *BMC Public Health* 2011;**11**:606
42. Stecklov G. Maternal Mortality Estimation: Separating Pregnancy-Related and Non- Pregnancy-Related Risks. *Studies in Family Planning* 1995;**26**(1):33-38
43. Garenne M. Estimating Obstetric Mortality from Pregnancy-Related Deaths Recorded in Demographic Censuses and Surveys. *Studies in Family Planning* 2011;**42**(4):237-46
44. Cross S, Bell JS, Graham WJ. What you count is what you target: the implications of maternal death classification for tracking progress towards reducing maternal mortality in developing countries. *Bulletin of the World Health Organization* 2010;**88**(2):147-53 doi: 10.2471/BLT.09.063537[published Online First: Epub Date].
45. National Statistics Office (NSO) [Malawi], ORC Macro [USA]. Malawi Demographic and Health Survey 2004. Calverton, Maryland: NSO and ORC Macro, 2005.
46. UNAIDS. Malawi HIV epidemiological factsheet. 2011 31/05/2011. <http://www.unaids.org/en/dataanalysis/epidemiology/epidemiologicalfactsheets/> (accessed 31/05/2011).
47. Jahn A, Floyd S, Crampin AC, et al. Population-level effect of HIV on adult mortality and early evidence of reversal after introduction of antiretroviral therapy in Malawi. *Lancet* 2008;**371**:1603-11
48. Harries A, Makombe S, Libamba E, et al. Why Did the Scale-up of HIV Treatment Work?: A Case Example From Malawi. *Journal Of Acquired Immune Deficiency Syndromes* 2011;**2011**(57):S64-S67
49. Zaba B, Calvert C, Marston M, et al. Effect of HIV infection on pregnancy-related mortality in sub-Saharan Africa: secondary analyses of pooled community- based data from the network for Analysing Longitudinal Population-based HIV/AIDS data on Africa (ALPHA). *Lancet* 2013;**381**:1763–71
50. Garenne M, Kathleen K, Collinson M, et al. Protective Effect of Pregnancy in Rural South Africa: Questioning the Concept of “Indirect Cause” of Maternal Death. *PLoS One* 2013;**8**(5):e64414
51. McCoy D, McPake B, Mwapasa V. The double burden of human resource and HIV crises: a case study of Malawi. *Human Resources for Health* 2008;**6**(16):doi:10.1186/478-4491-6-16
52. Graham WJ, Hussein J. Measuring and Estimating Maternal Mortality in the era of HIV/AIDS. Workshop on HIV/AIDS and Adult Mortality in Developing Countries: Population Division, Department of Economic and Social Affairs, United Nations Secretariat, 2003.

- 1  
2  
3  
4  
5  
6  
7  
8  
9  
10  
11  
12  
13  
14  
15  
16  
17  
18  
19  
20  
21  
22  
23  
24  
25  
26  
27  
28  
29  
30  
31  
32  
33  
34  
35  
36  
37  
38  
39  
40  
41  
42  
43  
44  
45  
46  
47  
48  
49  
50  
51  
52  
53  
54  
55  
56  
57  
58  
59  
60
53. González R, Ataíde R, Naniche D, et al. HIV and malaria interactions: where do we stand? *Expert Review of Anti-infective Therapy* 2012;**10**(2):153-65
  54. Wiebenga JE. Maternal mortality at Queen Elizabeth Central Hospital, 1989 to 1990. *Malawi Medical Journal*.8(1):19-23 1992
  55. Lema VM, Changole J, Kanyighe C, et al. Maternal mortality at the Queen Elizabeth Central Teaching Hospital, Blantyre, Malawi.[see comment]. *East African Medical Journal*.82(1):3-9 2005
  56. Kongnyuy EJ, Mlava G, van den BN. Facility-based maternal death review in three districts in the central region of Malawi an analysis of causes and characteristics of maternal deaths. *Womens Health Issues*. 2009(1):14-20
  57. Vink NM, de Jonge HCC, Ter Haar R, et al. Maternal death reviews at a rural hospital in Malawi. *International Journal of Gynaecology & Obstetrics* 2013;**120**(74-77)
  58. Combs Thorsen V, Sundby J, Malata A. Piecing Together the Maternal Death Puzzle through Narratives: The Three Delays Model Revisited. *PLoS One* 2012;**7**(12):e52090
  59. Ticconi C, Mapfumo M, Dorrucchi M, et al. Effect of maternal HIV and malaria infection on pregnancy and perinatal outcome in Zimbabwe. *J Acquir Immune Defic Syndr* 2003;**34**(3):289-94
  60. Nkhoma ET, Bowman NM, Kalilani-Phiri L, et al. The effect of HIV infection on the risk, frequency, and intensity of *Plasmodium falciparum* parasitemia in primigravid and multigravid women in Malawi. *American Journal of Tropical Medicine and Hygiene* 2012;**87**(6):1022-7
  61. Tonga C, Kimbi HK, Anchang-Kimbi JK, et al. Malaria risk factors in women on intermittent preventive treatment at delivery and their effects on pregnancy outcome in sanaga-maritime, cameroon. *PLoS One* 2013;**8**(6):e65876
  62. Bicego, George, Boerma, et al. The effect of AIDS on maternal mortality in Malawi and Zimbabwe. *AIDS* 2002;**16**(7):1078-81
  63. Government of Malawi Ministry of Health. Quarterly HIV Programme Report: April - June 2010. Available at: [http://www.hivunitmohmw.org/uploads/Main/Quarterly HIV Programme Report 2010 Q2.pdf](http://www.hivunitmohmw.org/uploads/Main/Quarterly_HIV_Programme_Report_2010_Q2.pdf) (accessed 29/10/2013), 2010.
  64. Government of Malawi Ministry of Health. Integrated HIV Program Report: October –December 2012. Available at: [http://www.hivunitmohmw.org/uploads/Main/Quarterly HIV Programme Report 2012 Q4.pdf](http://www.hivunitmohmw.org/uploads/Main/Quarterly_HIV_Programme_Report_2012_Q4.pdf) (accessed 29/10/2013), 2012.
  65. Munasinghe S, van den Broek N. Chapter 9 – Anaemia in Pregnancy in Malawi - A Review. The Epidemiology of Malawi. available at: [http://www.medcol.mw/commhealth/publications/epi book/Anaemia in pregnancy chapter 9.pdf](http://www.medcol.mw/commhealth/publications/epi_book/Anaemia_in_pregnancy_chapter_9.pdf) (accessed 30/10/2013): Department of Community Health, College of Medicine, Malawi, 2013.
  66. Etard JF, Kodio B, Ronsmans C. Seasonal variation in direct obstetric mortality in rural Senegal: Role of Malaria? *American Journal of Tropical Medicine & Hygiene* 2003;**68**(4):503-4
  67. Anya SE. Seasonal variation in the risk and causes of maternal death in the Gambia: Malaria appears to be an important factor. *American Journal of Tropical Medicine & Hygiene* 2004;**70**(5):510-13
  68. Desai M, Phillips-Howard PA, Odhiambo FO, et al. An Analysis of Pregnancy-Related Mortality in the KEMRI/CDC Health and Demographic Surveillance System in Western Kenya. *PLoS One* 2013;**8**(7):e68733
  69. Roca-Feltrer A, Kwizombe CJ, Sanjoaquin MA, et al. Lack of Decline in Childhood Malaria, Malawi, 2001–2010. *Emerging Infectious Diseases* 2012;**18**(2):272-78

- 1  
2  
3  
4  
5  
6  
7  
8  
9  
10  
11  
12  
13  
14  
15  
16  
17  
18  
19  
20  
21  
22  
23  
24  
25  
26  
27  
28  
29  
30  
31  
32  
33  
34  
35  
36  
37  
38  
39  
40  
41  
42  
43  
44  
45  
46  
47  
48  
49  
50  
51  
52  
53  
54  
55  
56  
57  
58  
59  
60
70. Okiro EA, Kazembe LN, Kabaria CW, et al. Childhood Malaria Admission Rates to Four Hospitals in Malawi between 2000 and 2010. *PLoS One* 2013;**8**(4):e62214
  71. Gutman J, Mwandama D, Wiegand RE, et al. Effectiveness of Intermittent Preventive Treatment With Sulfadoxine-Pyrimethamine During Pregnancy on Maternal and Birth Outcomes in Machinga District, Malawi. *Journal of Infectious Diseases* 2013:[Epub ahead of print]
  72. Muula AS, Phiri A. Did Maternal Mortality Ratio increase in Malawi between 1992-1998? Review of the Malawi Demographic and Health Surveys and other data sources. *Tropical Doctor* 2003;**33**:182-85
  73. World Bank. Poverty gap at \$1.25 a day (PPP) (%), Malawi 1998: 46%, 2004: 32%, 2010: 26%. World DataBank, World Development Indicators (<http://databank.worldbank.org/data/views/reports/chart.aspx>; accessed 14/08/2013), 2013.
  74. Ratsma E, Lungu K, Hofman J, et al. Why more mothers die: confidential enquiries into institutional maternal deaths in the Southern Region of Malawi. *Malawi Medical Journal* 2005;**17**(3):75-80
  75. National Statistics Office M, Macro International USA. Malawi Demographic and Health Survey 2000. Zomba, Malawi and Calverton, Maryland, US: NSO and Macro International Inc., 2001.
  76. WHO, UNICEF. Countdown to 2015, Maternal, Newborn and Child Survival: Building a Brighter Future for Women and Children, The 2012 Report, 2012.
  77. Department for International Development (DFID), Management Sciences for Health (MSH), Management Solutions Consulting (MSC) Limited. Evaluation of Malawi's Emergency Human Resources Programme, 2010.
  78. Hussein J, Goodburn EA, Damisoni H, et al. Monitoring obstetric services: Putting the 'UN guidelines' into practice in Malawi: 3 Years on. *International Journal of Gynecology and Obstetrics* 2001;**75**(1):63-73
  79. Lungu K, Ratsma Y. Does the upgrading of the radio communications network in health facilities reduce the delay in the referral of obstetric emergencies in Southern Malawi? *Malawi Medical Journal* 2007;**19**(1):1-8
  80. Hofman J, Dzimadzi C, Lungu K, et al. Motorcycle ambulances for referral of obstetric emergencies in rural Malawi: Do they reduce delay and what do they cost? *International Journal of Gynecology and Obstetrics* 2008;**102**(191-197)
  81. Bowie C, Mwase T. Assessing the use of an essential health package in a sector wide approach in Malawi. *Health Research Policy and Systems* 2011;**9**(4)
  82. Leigh B, Mwale TG, Lazaro D, et al. Emergency obstetric care: How do we stand in Malawi? *International Journal of Gynecology and Obstetrics* 2008;**101**:107-11
  83. Mueller DH, Lungu D, Acharya A, et al. Constraints to implementing the Essential Health Package in Malawi. *PLoS One* 2011;**6**(6)
  84. National AIDS Commission. Estimating National HIV Prevalence in Malawi from Sentinel Surveillance Data. Technical Report. Lilongwe, Malawi, 2003.
  85. Matthews Z, Channon A, Neal S, et al. Examining the "urban advantage" in maternal health care in developing countries. *PLoS medicine* 2010;**7**(9) doi: 10.1371/journal.pmed.1000327[published Online First: Epub Date].
  86. Jahn A, Floyd S, McGrath N, et al. Child mortality in rural Malawi: HIV closes the survival gap between the socio-economic strata. *PLoS One* 2010;**5**(6):e11320 doi: 10.1371/journal.pone.0011320[published Online First: Epub Date].

- 1  
2  
3  
4  
5  
6  
7  
8  
9  
10  
11  
12  
13  
14  
15  
16  
17  
18  
19  
20  
21  
22  
23  
24  
25  
26  
27  
28  
29  
30  
31  
32  
33  
34  
35  
36  
37  
38  
39  
40  
41  
42  
43  
44  
45  
46  
47  
48  
49  
50  
51  
52  
53  
54  
55  
56  
57  
58  
59  
60
87. Mann G, Bokasi M, Sangala W. Why are pregnant women dying? An equity analysis of maternal mortality in Malawi. *Malawi Medical Journal* 2006;**18**(1):32-38
88. UNICEF. The Situation of Women and Children in Malawi. <http://www.unicef.org/malawi/children.html> (Accessed 15/08/2013), 2013.
89. Graham W, Newell ML. Seizing the opportunity: collaborative initiatives to reduce HIV and maternal mortality. *Lancet* 1999;**353**:836-39
90. Garenne M, Kathleen K, Collinson M, et al. Maternal mortality in rural South Africa: the impact of case definition on levels and trends. *International Journal of Women's Health* 2013;**3**(5):457-63
91. Chipangwi JD, Zamaere TP, Graham WJ, et al. Maternal mortality in the Thyolo District of southern Malawi. *East African Medical Journal* 1992;**69**(12):675-9
92. McDermott JM, Slutsker L, Steketee RW, et al. Prospective assessment of mortality among a cohort of pregnant women in rural Malawi. *American Journal of Tropical Medicine & Hygiene*.55(1 Suppl):66-70 1996
93. Beltman JJ, van den Akker T, Lam E, et al. Repetition of a sisterhood survey at district level in Malawi: the challenge to achieve MDG 5. *BMJ Open* 2011;**1**(e000080) doi: D - NLM: PMC3191428 EDAT- 2011/10/25 06:00 MHDA- 2011/10/25 06:01 CRDT- 2011/10/25 06:00 PHST- 2011/05/05 [aheadofprint] AID - bmjopen-2011-000080 [pii] AID - 10.1136/bmjopen-2011-000080 [doi] PST - epublish[published Online First: Epub Date].
94. van den Broek NR, White SA, Ntonya C, et al. Reproductive health in rural Malawi: a population-based survey. *BJOG: An International Journal of Obstetrics & Gynaecology*.110(10):902-8 2003
95. National Statistical Office (NSO). *Malawi Family Formation Survey*. Zomba, Malawi: Government Printer, 1984.
96. World Bank. World DataBank. World Development Indicators, Malawi (available at: <http://databank.worldbank.org/data/views/reports/chart.aspx> (accessed 13/08/2013).
97. World Health Organisation. WHO Statistical Information System Database (available at: <http://apps.who.int/whosis/data/Search.jsp> (accessed 13/08/2013).
98. National Aids Commission. *Estimating National HIV Prevalence in Malawi from Sentinel Surveillance Data: Technical Report*. Lilongwe, Malawi; October 2003. Lilongwe, Malawi, 2003.

1  
2  
3  
4  
5  
6  
7  
8  
9  
10  
11  
12  
13  
14  
15  
16  
17  
18  
19  
20  
21  
22  
23  
24  
25  
26  
27  
28  
29  
30  
31  
32  
33  
34  
35  
36  
37  
38  
39  
40  
41  
42  
43  
44  
45  
46  
47  
48  
49  
50  
51  
52  
53  
54  
55  
56  
57  
58  
59  
60

**Figure 1: Trends in maternal mortality in Malawi and its Southern, Central and Northern regions, and estimated maternal mortality due to HIV, 1977 to 2010**

For peer review only

1  
2  
3 **Figure 2: Overview of variables linked to maternal mortality in Malawi**  
4  
5  
6  
7  
8  
9  
10  
11  
12  
13  
14  
15  
16  
17  
18  
19  
20  
21  
22  
23  
24  
25  
26  
27  
28  
29  
30  
31  
32  
33  
34  
35  
36  
37  
38  
39  
40  
41  
42  
43  
44  
45  
46  
47  
48  
49  
50  
51  
52  
53  
54  
55  
56  
57  
58  
59  
60

For peer review only



**Table 1. Population-based Studies and Analyses of Maternal Mortality in Malawi**

| Study                                   | Year      | Method                           | Case Definition                                                                                                                            | Location                                                       | Maternal Deaths | MMR (95% CI) <sup>a</sup>        |
|-----------------------------------------|-----------|----------------------------------|--------------------------------------------------------------------------------------------------------------------------------------------|----------------------------------------------------------------|-----------------|----------------------------------|
| Chiphangwi (1992) [91]                  | 1977-1979 | Indirect Sisterhood <sup>b</sup> | Deaths of sisters who died "during pregnancy, childbirth or within 6 weeks of giving birth"                                                | Southern Region (Thyolo district)                              | 150             | <b>409</b> (349-480)             |
| Malawi DHS 1992 (re-analysis) [22]      | 1977-1983 | Direct Sisterhood                | Deaths during pregnancy, childbirth and up to 6-weeks afterwards                                                                           | Malawi (all regions)                                           |                 | <b>269</b> (??)                  |
| Malawi DHS 1992 (re-analysis) [22]      | 1979-1985 | Direct Sisterhood                | (as above)                                                                                                                                 | Malawi (all regions)                                           | 42              | <b>408</b> (242-575)             |
| McDermot 1996 [92]                      | 1987-1989 | Prospective Cohort               | (as above)                                                                                                                                 | Southern Region (Mangochi district)                            | 15              | <b>398</b> (241-656)             |
| Malawi DHS 1992 <sup>c</sup> [3]        | 1986-1992 | Direct Sisterhood                | (as above)                                                                                                                                 | Malawi (all regions)                                           | 71              | <b>620<sup>d</sup></b> (410-830) |
| Malawi DHS 1992 (re-analysis) [22]      | 1986-1992 | Direct Sisterhood                | (as above)                                                                                                                                 | Malawi (all regions)                                           | 82              | <b>752</b> (497-1006)            |
| Beltman 2011 [93]                       | 1994-1996 | Indirect Sisterhood <sup>b</sup> | Deaths of sisters who died "during pregnancy, childbirth or within 6 weeks of giving birth"                                                | Southern Region (Thyolo district)                              | 84              | <b>558</b> (260-820)             |
| Malawi DHS 2000 <sup>e</sup> [75]       | 1994-2000 | Direct Sisterhood                | Deaths during pregnancy, childbirth and up to 2-months afterwards                                                                          | Malawi (all regions)                                           | 344             | <b>1120</b> (950-1288)           |
| Malawi DHS 2004 <sup>e</sup> [45]       | 1998-2004 | Direct Sisterhood                | Deaths during pregnancy, childbirth and up to 2-months afterwards                                                                          | Malawi (all regions)                                           | 240             | <b>984</b> (804-1164)            |
| MICS 2006 <sup>e</sup> [23]             | 2000-2006 | Direct Sisterhood                | Deaths during pregnancy, childbirth and up to 2-months afterwards                                                                          | Northern Region                                                | 33              | <b>543</b> (325-761)             |
|                                         |           |                                  |                                                                                                                                            | Central Region                                                 | 190             | <b>678</b> (529-828)             |
|                                         |           |                                  |                                                                                                                                            | Southern Region                                                | 246             | <b>1029</b> (840-1217)           |
|                                         |           |                                  |                                                                                                                                            | Urban Malawi                                                   | 77              | <b>861</b> (492-1230)            |
|                                         |           |                                  |                                                                                                                                            | Rural Malawi                                                   | 392             | <b>802</b> (689-915)             |
|                                         |           |                                  |                                                                                                                                            | Malawi (all regions)                                           | 469             | <b>807</b> (696-918)             |
| van den Broek 2003 [94]                 | 2002      | Household Survey                 | "The death of a woman associated with childbirth". Timing not stated.                                                                      | Southern Region (rural)                                        | 9               | <b>413</b> (144-682)             |
| Malawi DHS 2010 <sup>e</sup> [1]        | 2004-2010 | Direct Sisterhood                | Deaths during pregnancy, childbirth and up to 2-months afterwards                                                                          | Malawi (all regions)                                           | 331             | <b>675</b> (570-780)             |
| MaiMwana (control arm) [9]              | 2006-2009 | Surveillance (Prospective)       | WHO ICD-10 maternal death (see Background section). All 29 maternal deaths were verified by verbal autopsy.                                | Central Region (Mchinji district, rural)                       | 29              | <b>585</b> (407-838)             |
| MaiKhanda (total <sup>e</sup> ) [10 25] | 2007-2010 | Surveillance (Prospective)       | WHO ICD-10 maternal death (see Background section), 51/102 (50%) verified by verbal autopsy, the rest verified by call-backs to community. | Central Region (Kasungu, Lilongwe and Salima districts, rural) | 102             | <b>299</b> (247-363)             |

<sup>a</sup> calculated as (100,000 / MMR)\*Maternal deaths; for sisterhood studies calculated as ((maternal deaths / exposure years) / general fertility rate) \* 100,000  
Shouldn't be compared with direct sisterhood method as although the reference period is on average 12 years before the survey it includes more recent deaths, which will bias the 12-year old estimate upwards given that the MMR in Malawi increased in the 1990s.

<sup>c</sup> The lower 95%CI of the MMR is calculated from the upper 95%CI of the GFR (less deaths per more births) and visa-versa. Fertility is only reported for the whole sample in the MICS survey, therefore only the whole sample MMR (Malawi (all regions)) could be recalculated.

<sup>d</sup>In the 1992 DHS the GFR used to calculate MMR is stated as 0.220 (Table 11.4, page 123). However in Chapter 3 on Fertility the total GFR is stated as 223 per 1000 women (or 0.223; Table 3.1 page 19) but this is for women aged 15-44 only. Using the raw data on number of women interviewed weighted by population of each cluster (district) so that the sample is representative of the whole of Malawi (Table 2.8.2 page 15) results in a Total GFR per woman aged 15-49 of 0.208 which is different to the 0.220 used to arrive at the MMR of 620 produced in the report.

<sup>e</sup>Given the MaiKhanda trial showed no effect of either of the interventions on maternal mortality

**Table 2: Comparison of estimated trends in the maternal mortality ratio in Malawi from 1990 to 2010**

| 1977 | 1990 | 1995 | 2000 | 2005 | 2010 | Source                                       |
|------|------|------|------|------|------|----------------------------------------------|
| 223  | 748  | 916  | 970  | 846  | 484  | This paper, all years of survey <sup>a</sup> |
|      | 606  |      | 1397 |      | 422  | IHME                                         |
|      | 1100 | 1000 | 840  | 630  | 460  | MMEIG                                        |

<sup>a</sup>Best-fitting fractional polynomial transformation of MMR by year, using estimates for all years covered by each survey, see Web Appendix 1 for explanation

For peer review only

**Table 3. Changes in variables hypothesised to be associated with changes in maternal mortality in Malawi**

| Variable                                                                                    | Trend: Year |                         |                         |                         |                         |                        |
|---------------------------------------------------------------------------------------------|-------------|-------------------------|-------------------------|-------------------------|-------------------------|------------------------|
|                                                                                             | 1982        | 1989                    | 1997                    | 2001                    | 2003                    | 2007                   |
| <b>MMR (approximate from Figure 1)</b>                                                      | <b>400</b>  | <b>700</b>              | <b>950</b>              | <b>950</b>              | <b>800</b>              | <b>700</b>             |
| % deliveries by skilled attendant                                                           |             | 55.5% [3]               | 55.6% [75]              | 57% [45]                | 54% [23]                | 71.4% [1]              |
| % of deliveries by TBA                                                                      |             | 17.7% [3]               | 22.7% [75]              | 26.2% [45]              | 28.8% [23]              | 14.4% [1]              |
| % of deliveries by Relative / other person                                                  |             | 21.8% [3]               | 19.0% [75]              | 14.2% [45]              | 13.0% [23]              | 8.7% [1]               |
| % of deliveries alone                                                                       |             | 5.0% [3]                | 2.4% [75]               | 2.1% [45]               | 2.4% [23]               | 2.6% [1]               |
| % of deliveries by C-Section                                                                |             | 3.4% [3] <sup>a</sup>   | 2.8% [75] <sup>a</sup>  | 3.1% [45] <sup>a</sup>  | 2.8% [82] <sup>a</sup>  | 4.6% [1]               |
| Total Fertility Rate (TFR) <sup>b</sup>                                                     | 7.6 [95]    | 6.7 [3]                 | 6.3 [75]                | 6.0 [45]                | 6.3 [23]                | 5.7 [1]                |
| General Fertility Rate (GFR) <sup>c</sup>                                                   | 0.264 [95]  | 0.223 [3]               | 0.223 [75]              | 0.215 [45]              | 0.225 [23]              | 0.202 [1]              |
| Unmet need for FP services (%)                                                              |             | 36% [3]                 | 30% [75]                | 28% [7]                 |                         | 26% [1]                |
| Contraceptive prevalence rate (%)                                                           |             | 13.0% [3]               | 32.5% [75]              | 32.5% [7]               | 41% [8]                 | 42.2% [1]              |
| GNI per capita (Atlas method, current US\$)                                                 | \$180 [96]  | \$160 [96]              | \$200 [96]              | \$140 [96]              | \$190 [96]              | \$250 [96]             |
| GNI per capita, Purchasing Power Parity (PPP) (current International \$)                    | \$330 [96]  | \$380 [96]              | \$550 [96]              | \$550 [96]              | \$580 [96]              | \$710 [96]             |
| Per capita Total expenditure on health (average exchange rate US\$)                         |             |                         | \$20 [97]               | \$11 [97]               | \$18 [97]               | \$20 [97] <sup>d</sup> |
| Per capita Total expenditure on health (PPP, international \$)                              |             |                         | \$35 [97]               | \$34 [97]               | \$60 [97]               | \$70 [97] <sup>d</sup> |
| Per capita Government expenditure on health (average exchange rate US\$)                    |             |                         | \$6 [97]                | \$7 [97]                | \$13 [97]               | \$15 [97] <sup>d</sup> |
| Per capita Government expenditure on health (PPP, international \$)                         |             |                         | \$10 [97]               | \$21 [97]               | \$45 [97]               | \$51 [97] <sup>d</sup> |
| External Resources for Health as a Percentage of Total expenditure on health                |             |                         | 19.5% [97]              | 42.4% [97]              | 61.6% [97]              |                        |
| Female literacy rate (ages 15 and above)                                                    |             | 33.5% [96] <sup>f</sup> | 54% [96] <sup>g</sup>   | 56.5% [75] <sup>h</sup> | 62.4% [45] <sup>i</sup> | 67.6% [1] <sup>j</sup> |
| Secondary school enrolment of females (gross %)                                             | 10% [96]    | 11.5% [96]              | 20.4% [96] <sup>k</sup> | 28.8% [96]              | 25.5% [96] <sup>l</sup> | 26.4% [96]             |
| Female Life Expectancy at birth                                                             | 46.1 [96]   | 48.1 [96]               | 46.9 [96]               | 46.5 [96]               | 47.3 [96]               | 50.8 [96]              |
| Adult Female Mortality (mortality rate/1000 years exposure)                                 | 2.6 [3]     | 6.5 [3]                 | 11.3 [75]               | 11.6 [45]               | 8.7 [23]                | 8.4 [1]                |
| % of adult female deaths that are maternal <sup>m</sup>                                     |             | 20.8% [3]               | 21.6% [75]              | 17.5% [45]              | 19.1% [23]              | 15.6% [1]              |
| HIV prevalence (adult population, modelled from sentinel surveillance in antenatal clinics) | 0% [98]     | 5% [98]                 | 14% [98]                | 14% [98]                | 13% [98]                | 12% [46]               |
| Short maternal stature (% <145cm tall)                                                      |             | 2.8% [3] <sup>n</sup>   |                         | 3.0% [75] <sup>o</sup>  | 3.1% [45] <sup>i</sup>  | 2.4% [1] <sup>p</sup>  |

<sup>a</sup> Livebirths only<sup>b</sup> Average number of children born to a women during her lifetime<sup>c</sup> Births / number of women aged 15-44<sup>d</sup> Estimate for 2006<sup>e</sup> Estimate for 1980<sup>f</sup> Estimate for 1987<sup>g</sup> Estimate for 1998<sup>h</sup> Estimate for 2000. If women who can only read part of a sentence are excluded then 48.6%<sup>i</sup> Estimate for 2004. If women who can only read part of a sentence are excluded then 53.8%<sup>j</sup> Estimate for 2010. If women who can only read part of a sentence are excluded then 59.4%<sup>k</sup> Estimate for 1996<sup>l</sup> Estimate for 2004<sup>m</sup> Calculated as number of maternal deaths divided by number of adult female deaths given in separate tables in the survey reports<sup>n</sup> Estimate for 1992<sup>o</sup> Estimate for 2000<sup>p</sup> Estimate for 2010

## Maternal Mortality in Malawi, 1977 to 2012

Tim Colbourn<sup>a,§</sup>, Sonia Lewycka<sup>a</sup>, Bejoy Nambiar<sup>a</sup>, Iqbal Anwar<sup>b</sup>, Ann Phoya<sup>c</sup>,  
Chisale Mhango<sup>d</sup>

<sup>a</sup>UCL Institute for Global Health, 30 Guilford Street, London, WC1N 1EH, UK

<sup>b</sup>icddr, International Centre for Diarrhoeal Diseases Research, Bangladesh, Mohakhali, Dhaka 1212

<sup>c</sup>Government of the Republic of Malawi, Ministry of Health Sector-Wide Approach (SWAp)

<sup>d</sup>Director, Government of the Republic of Malawi, Ministry of Health Reproductive Health Unit, off Paul Kagame Road, Lilongwe, Malawi

§ corresponding author: [t.colbourn@ucl.ac.uk](mailto:t.colbourn@ucl.ac.uk)

### Abstract

#### Background

Millennium Development Goal 5 (MDG 5) targets a 75% reduction in maternal mortality from 1990 to 2015, yet accurate information on trends in maternal mortality and what drives them is sparse. We aimed to fill this gap for Malawi, a country in sub-Saharan Africa with high maternal mortality.

#### Methods

We reviewed the literature for population-based studies that provide estimates of the maternal mortality ratio (MMR) in Malawi, and for studies that list and justify variables potentially associated with trends in MMR. We used all population-based estimates of MMR representative of the whole of Malawi to construct a best-fit trend-line for the range of years with available data; calculated the proportion attributable to HIV, and qualitatively analysed trends and evidence related to other covariates to logically assess likely candidate drivers of the observed trend in MMR.

#### Results

Fourteen suitable estimates of MMR were found, covering the years 1977-2010. The resulting best-fit line predicted MMR in Malawi to have increased from ~~317~~<sup>around 350</sup> maternal deaths per 100,000 livebirths in 1980, to ~~74800~~ in 1990, before peaking at ~~around 9714000~~ in ~~19992000~~, and falling to ~~around 84650~~ in 2005 and ~~484~~<sup>below 500</sup> in 2010. Concurrent deteriorations and improvements in HIV and health system investment and provision are the most plausible explanations for the trend. Female literacy and education, family planning, and poverty reduction could play more of a role if thresholds are passed in coming years.

#### Conclusion

The decrease in MMR in Malawi is encouraging as it appears recent efforts to control HIV and improve the health system are bearing fruit. Sustained efforts to prevent and treat maternal complications are required if Malawi is to attain the MDG 5 target and save the lives of more of its mothers in years to come.

1  
2  
3  
4  
5  
6  
7 **Key Words:** Maternal Mortality, Malawi, Trends, Health systems, HIV  
8  
9

10 **Strengths and Limitations of this study:**

- 11 | • Provides most detailed review of trends in maternal mortality in Malawi to date,  
12 including estimation of trends in the maternal mortality ratio, comparison with  
13 WHO and IHME estimates, and assessment of the variables most likely to have  
14 driven the trend  
15 • Includes quantitative estimation of the impact of HIV and antiretroviral treatment  
16 on maternal mortality in Malawi  
17 • Sparse data precluded the possibility of quantitatively modelling the relationships  
18 between potential explanatory variables and maternal mortality in Malawi  
19 • The study is comprehensive and conducted by researchers with extensive  
20 knowledge and experience of maternal health in Malawi; however, it is not a  
21 systematic review  
22  
23  
24  
25  
26  
27  
28  
29  
30  
31  
32  
33  
34  
35  
36  
37  
38  
39  
40  
41  
42  
43  
44  
45  
46  
47  
48  
49  
50  
51  
52  
53  
54  
55  
56  
57  
58  
59  
60

## Background

Maternal mortality in Malawi is high, the most recent national survey estimate is 675 maternal deaths per 100,000 livebirths during the period 2004-2010 [1]. Millennium Development Goal (MDG) 5, aims to reduce maternal mortality by 75% between 1990 and 2015 [2]. This equates to a reduction from 620 maternal deaths per 100,000 livebirths in 1990 [3] to 155 by 2015. We review data on maternal mortality from population-based studies in Malawi, and explore trends and possible reasons behind them, in order to gauge progress towards achieving the MDG.

The maternal Mortality Ratio (MMR) is the most common measure of maternal mortality and is expressed as the number of maternal deaths per 100,000 livebirths, where a maternal death is defined as *“the death of a woman while pregnant or within 42 days of the termination of pregnancy, irrespective of the duration and the site of the pregnancy, from any cause related to or aggravated by the pregnancy or its management but not from accidental or incidental causes”* [4]. Maternal deaths can be divided into direct and indirect obstetric deaths. Direct obstetric deaths are defined as: “those resulting from obstetric complications of the pregnant state (pregnancy, labour and puerperium), from interventions, omissions, incorrect treatment, or from a chain of events resulting from any of the above” [4] and indirect obstetric deaths as “those resulting from previous existing disease or disease that developed during pregnancy and which was not due to direct obstetric causes, but which was aggravated by physiologic effects of pregnancy” [4]. Data pertaining to obstetric deaths are not always available. Deaths occurring during pregnancy, childbirth and puerperium, hereafter referred to as ‘pregnancy-related’ deaths are defined as “death occurring during pregnancy, childbirth and puerperium is the death of a woman while pregnant or within 42 days of termination of pregnancy, irrespective of the cause of death (obstetric and non obstetric)” [4]. Given a lack of adequate information on causes of death, surveys reporting maternal mortality often rely only on the timing of the death in relation to pregnancy and therefore report pregnancy-related mortality as MMR. In settings such as Malawi, where it is difficult to distinguish between HIV-disease-related indirect obstetric deaths and incidental deaths due to HIV coincident with pregnancy, this is also more likely.

The leading biological causes of maternal death in Africa are haemorrhage, infections and hypertensive disorders [5], and these deaths are mediated by a complex set of underlying social, economic and behavioural factors, typically grouped into the Three Delays [6]. The delay by the patient in the decision to seek care, the delay in reaching the appropriate care once the decision has been made to seek care and the delay in receiving adequate care after arriving at the health facility, all contribute to maternal mortality. Dynamics in the drivers of these delays and in interventions to ameliorate them and treat the biological causes of maternal death they allow, all contribute to changing trends in maternal mortality [7].

## Methods

### *Review of MMR data in Malawi*

We searched for studies concerning maternal mortality in Malawi, primarily via PubMed and Google Scholar, but also including Demographic and Health Survey (DHS) reports and those from the United Nations (UN) and World Health Organisation (WHO). The



1  
2  
3  
4  
5  
6 search term: “(maternal OR pregnancy-related) AND (mortality OR death) AND Malawi”  
7 retrieved 203 articles on PubMed in a final search on 28<sup>th</sup> October 2013. Abstracts were  
8 screened and full-texts retrieved when the abstract indicated data on population-level  
9 maternal mortality – i.e. purely facility-based studies were excluded. This search yielded  
10 4 studies, all reporting sub-national population-based estimates of MMR. All national-  
11 level estimates of MMR were obtained from DHS and Multiple Indicator Cluster Survey  
12 (MICS) reports; and our combined total of over seventy (concurrent) years of experience  
13 working in maternal health in Malawi has not made us aware of any additional studies.  
14 The following information was extracted: date, location and method of survey, case  
15 definition of maternal death, number of maternal deaths and livebirths, and MMR and  
16 confidence intervals (Table 1). Studies containing all of this information and definitions  
17 of maternal death or pregnancy-related death analogous to those stated in the introduction  
18 were considered to be of adequate quality for inclusion in our review. No identified  
19 studies were rejected on quality grounds and there were no disagreements among authors  
20 on which studies to include, or on the data extracted.

21  
22 Two of the data sources for maternal mortality estimates are from prospective population-  
23 based surveillance systems in the central region of Malawi. In both systems, community-  
24 based enumerators collected information about pregnancies, births and deaths, and deaths  
25 were followed up by verbal autopsies conducted by field supervisors. In MaiMwana  
26 project, in Mchinji district, the enumerators were paid staff who reported to field  
27 interviewers and supervisors who followed up with further post-partum interviews [8].  
28 Data was included for control areas of the study (with no interventions), for the period 1<sup>st</sup>  
29 January 2005 to 31<sup>st</sup> January 2009 [9]. In MaiKhanda, in Lilongwe, Salima and Kasungu  
30 districts, the enumerators were volunteers who covered a smaller population each, and  
31 who reported to community health workers, officially referred to as Health Surveillance  
32 Assistants (HSA). Given the lack of an observed effect of the MaiKhanda interventions on  
33 maternal mortality data was included for all areas, for the period 1<sup>st</sup> July 2007 to  
34 31<sup>st</sup> December 2010 [10].

35 Not all of the published studies reported 95% confidence intervals for their estimates, so  
36 these were calculated using the Newcombe-Wilson method without continuity correction  
37 [11]. Data from the 1992 DHS were re-analysed in a study by ORC Macro [12].

38  
39 We estimate the trend in the MMR in Malawi from 1977 to 2010 using the best-fit multi-  
40 term fractional polynomial transformation based on the available population-level data  
41 representing the whole country, using the **fracpoly** command in Stata 13.0 for Mac.  
42 Further details are provided in Web Appendix 1. We compare this trend to that estimated  
43 by recent modelling studies.

#### 44 *Review of drivers of MMR in Malawi*

45 A list of possible variables that could have impacted on MMR in Malawi was drawn up  
46 using results from modelling studies [13 p85 14-16] and relevant overviews [7 17 18].  
47 Literature and internet-based databases were used to obtain data on the levels of each of  
48 the relevant variables in Malawi over the last 35 years. Identified variables were:  
49 percentage of deliveries attended by skilled personnel, percentage of deliveries by C-  
50 Section, Total Fertility Rate (TFR), Gross National Income (GNI) per capita, health  
51 expenditure per capita, life expectancy at birth, female illiteracy rate, HIV prevalence and  
52 access to antiretroviral therapy, political stability, malaria, malnutrition, and variables  
53 associated with the accuracy of MMR data collection. The trends in these variables and in  
54 intermediate variables concerned with their mechanisms of action were then compared to  
55 the trends in MMR in order to qualitatively and logically assess whether they might have

1  
2  
3  
4  
5  
6 contributed to changes in MMR in Malawi. Bivariate and multivariate linear regressions  
7 were run, but a lack of data points reduced the power of these models to detect significant  
8 associations, especially non-linear associations and interaction terms -both of which are  
9 likely given the complex nature of potential causal pathways between the variables and  
10 MMR-, therefore these results are not included. The lack of data points also precluded the  
11 use of multiple imputation to estimate MMR and the effects of the potential predictor  
12 variables for the years with missing data.

13  
14 We used the relative-risk of pregnancy-related mortality in HIV positive compared to HIV  
15 negative women estimated by Calvert and Ronsmans via systematic review and meta-  
16 analysis to be 7.74 [19], to estimate the proportion of the MMR that is due to HIV  
17 depending on the HIV prevalence. We adjusted this proportion downwards from 2003 to  
18 account for the increasing impact of the antiretroviral therapy (ART) programme in  
19 Malawi [20 21]. Further details are provided in Web Appendix 2.

## 20 21 22 **Results**

### 23 ***Studies of Population MMR in Malawi***

24 Eleven studies reporting population-based estimates of MMR were found, and one study  
25 contributed four separate estimates [3 22] (Table 1). All DHS and MICS studies, i.e. all of  
26 the studies providing national-level estimates, use pregnancy-related deaths as case-  
27 definitions of maternal deaths to calculate MMR.

### 28 29 30 ***Trend in national population-based estimates of MMR***

31 Figure 1 plots the MMR of the 8 analyses, each applying to a pre-survey time period of a  
32 number of years, from the 5 surveys representative of the whole of Malawi (the four DHS  
33 surveys and the MICS survey) and the other surveys representative of specific regions of  
34 Malawi (Table 1). It appears that from a low of around 400 in the early 1980s the MMR  
35 rose rapidly throughout the 1980s and early to mid-1990s to a peak of over 1000 maternal  
36 deaths per 100,000 livebirths around 1997. The MMR then fell to around 800 by 2003 and  
37 to an estimated 675 in 2007 [1].

38  
39 Figure 1 plots locally-weighted (Lowess) regression trends for the estimates and 95%CI  
40 of the national-level surveys in black. The best-fit fractional polynomial transformation is  
41 plotted in gold, details of its calculation are provided in Web Appendix 1. A comparison  
42 of this best-fit trend line and recent modelling studies is provided in Table 2. The WHO  
43 estimates of MMR for Malawi, developed by the Maternal Mortality Estimation Inter-  
44 Agency Group (MMEIG) [15] are based on a model fitted for all countries of the world  
45 and therefore may not accurately convey country-specific nuances. This seems very likely  
46 for Malawi as the higher 1990 figure and steady decline (Table 2) seems to ignore the  
47 evidence suggesting a rise in the 1990s followed by a fall in the 2000s (Figure 1). Despite  
48 also being generalised to many countries, a different model developed by the Institute for  
49 Health Metrics and Evaluation (IHME) does capture this rise and fall [16], although they  
50 estimate a much higher peak around the year 2000 than our estimate (Table 2). The  
51 MMEIG and IHME estimates differ as they are obtained from statistical models  
52 containing different covariates. The MMEIG uses Gross Domestic Product per capita  
53 (GDP), General Fertility Rate (GFR) and Skilled Birth Attendance (SBA) [15]. IHME  
54 uses analogous measures, but also uses antenatal care coverage, female education by age,  
55 ARV-adjusted HIV prevalence, neonatal death rate and malnutrition [16]. In addition, it is  
56 unclear whether the IHME estimates are based on exactly the same national-level MMR

data sources as the MMEIG estimates (which use DHS and MICS), because the sources of the expanded set of sibling history data used by IHME are not disclosed in their paper or web appendix [16]. Our best-fitting estimate only uses national-level MMR data by year without using any additional covariates.

### ***Trend in estimates of MMR in Central Region of Malawi***

Data from prospective surveillance of populations in Mchinji (MaiMwana) and Salima, Lilongwe and Kasungu (MaiKhanda) give MMRs of 585 for MaiMwana during 2005-8 and 299 for MaiKhanda during 2007-10 (Table 1; Figure 1). These numbers, which are based on obstetric deaths, are lower than the most recent national estimates from DHS and MICS reports, which are based on pregnancy-related deaths (Table 1). This may, however, also reflect lower MMR in the Central Region of Malawi, which was estimated to be 678, compared to the national estimate of 807 in the MICS report, during 2000-6 (Table 1). Although this difference is not statistically significant (the 95% confidence intervals overlap), the 2006 MICS reports the Central and Northern regions of Malawi to have significantly lower MMR than the Southern region [23] (Table 1). Comparison of DHS data by region was not possible because the place of exposure and death of the respondents' sisters who died is not recorded [24].

### ***Variables linked to changes in MMR***

Figure 2 conceptualises potential drivers of maternal mortality in Malawi. These linkages, and the evidence supporting them, are described below. Table 3 accompanies this analysis by examining how trends in each of the explanatory variables relate to the estimated trend of maternal mortality.

### ***Skilled Birth Attendance, Caesarean Section and Emergency Obstetric Care***

The proportion of women attended by a skilled health professional at delivery has changed very little over the majority of the period in question, so is unlikely to have contributed to the observed changes in MMR. Similarly, although home deliveries attended by relatives or friends have decreased, they appear to have shifted to deliveries by Traditional Birth Attendants (TBA) resulting in a similar proportion of deliveries remaining unskilled~~deliveries attended by traditional birth attendants have increased, this is largely due to a decrease in the proportion of deliveries attended by relatives or no one at all during all but the most recent years of the period in question~~ (Table 3). The DHS 2010 results [1] show that skilled birth attendance increased to 71% in the 6 years to 2010 however, whilst MMR fell to 675. This is encouraging, however further declines in maternal mortality could perhaps be possible if it were not for the overcrowding of facilities and the fact that human and material resources for health have not kept pace with the recent rapid rise in women delivering at facilities [25].

The lack of association of SBA with MMR questions the validity of the indicator 'delivery by a skilled birth attendant' as a proxy for MMR, especially on consideration that many Asian countries have achieved a lower MMR with much lower skilled attendance at birth e.g., Bangladesh [26 27] and Nepal [28 29]. It is also possible that both the actual level of skills and knowledge of the attendants and the ability of the surrounding environment (e.g. drugs and supplies) to ensure the possibility of truly skilled attendance including provision of basic and comprehensive emergency obstetric care has altered significantly over the period in question [30]. However, there is insufficient data to determine whether such changes took place in Malawi. In addition, there has been no adequate verification of the reporting of attendance by nurses, midwives and doctors (taken by the DHS to be 'skilled attendance') by the women surveyed to arrive at these statistics [30 31].

1  
2  
3  
4  
5  
6  
7 Remaining below the WHO recommended minimum level of 5%, the Caesarean Section  
8 rate in Malawi has been consistently low throughout the last 20 years (Table 3). It is  
9 therefore unlikely to be associated with the observed trends in MMR. It is also important  
10 to note that we are unaware of the indications of these C-sections and in particular  
11 whether they were undertaken for live-saving purposes. When the population based C-  
12 section rate is low it should, however, be done to save women's lives [32]. Health facility  
13 delivery is high in Malawi but, according to the latest national assessment, 39% of facility  
14 deliveries take place in health centres, which are poorly resourced, whilst 61% take place  
15 in hospitals; and the referrals of complicated cases either from home or from health  
16 centres to hospitals where blood and surgery is available is not always efficient [33]. Most  
17 C-sections in Malawi are performed by clinical officers, not by obstetricians or doctors.  
18 However, studies have revealed that clinical officers are comfortable [34] and competent  
19 [35 36] performing such operations.

### 20 **Fertility and Family planning**

21 The Total Fertility Rate (TFR) may have an impact on maternal mortality, as women of  
22 high parity are at increased risk of potentially fatal maternal complications [37] and the  
23 lifetime risk of maternal death increases with the greater the number of times a woman is  
24 exposed to pregnancy and childbirth. However, from 1982 to 2003 the TFR has changed  
25 little in comparison to the change in MMR and in fact even dropped slightly in the 1980s  
26 and 1990s while the MMR was increasing (Table 3), therefore it is unlikely to be related  
27 to the observed trend in MMR in Malawi. The slight reduction in TFR has not impacted  
28 on the rate of population growth in Malawi, which contributes to overburdening the health  
29 system.  
30

31 Family planning methods, if accepted by a large proportion of the population, and if used  
32 continuously over prolonged periods, reduce fertility rates and consequent maternal  
33 deaths and thus contribute to reducing MMR. Family planning reduces MMR by reducing  
34 the total number of pregnancies (parity) as well as the number of unintended, unwanted  
35 and untimely pregnancies, which are often high risk [38]. Reducing unwanted pregnancies  
36 will reduce induced abortions. Abortions are estimated to be the cause of between 5% and  
37 18% of maternal deaths according to a range of primarily hospital-based studies assessed  
38 by Bowie and Geubbels [7]. Safe abortion in Malawi is only permitted where the life of  
39 the mother is threatened; such restrictive abortion laws have not been shown to reduce  
40 maternal mortality anywhere. Success in family planning also brings about a shift in risk  
41 groups from high parity to low parity and from older age to younger age [37] but the  
42 impact of this shift on the MMR is possibly small [39].  
43

44 Although the contraceptive prevalence rate has increased over the last 20 years, this has  
45 not resulted in large changes in total fertility. Maternal mortality increased during the  
46 period of increasing contraceptive use, so they are unlikely to be related. However, it's  
47 possible that sustained gains in contraception use during the last decade, when HIV was  
48 less of a contributor to MMR (Figure 1), could have reduced MMR.

### 49 **Gross National Income per capita**

50 GNI per capita is consistently very low throughout the whole period and is unlikely to  
51 have contributed to significant improvements in maternal health. Given the history of  
52 maternal mortality in industrialised countries in the first half of the twentieth century it is  
53 also unlikely that recent increase in GNI will have contributed to the recent reduction in  
54 MMR, unless it led to improvements in the empowerment of women to make decisions,  
55 transport, and the availability of high-quality obstetric care [6 7].  
56

### Health expenditure

The trend in MMR may be related to the trend in health expenditure (Table 3). Due to an economic slump in 1994/95 government health spending was reduced, and although cushioned by increases in donor funding, still dropped from 45.1 [Malawi Kwacha \(MKW\)](#) per capita in 1994 to 40.9MKW per capita in 1998 [40] at a time when the MMR was increasing rapidly. Also, both total (government, private and individual) and government per capita health expenditure has increased in recent years, whilst the MMR has gone down.

### Female Literacy and Education

Female literacy is an indicator of formal education, and is known to be associated with lower MMR through increased knowledge of family planning and lower fertility, and increased knowledge of danger signs of pregnancy and the importance of skilled delivery [40]. At 79.7%, female literacy is higher in the Northern region of Malawi, than either the Central region (64.5%) or the Southern region (67.5%) [1]. Despite maternity services being more sparsely distributed and under more hostile terrain the MMR is lower in northern Malawi [23], perhaps due to the higher female literacy. For the country as a whole, there have been recent gains in adult female literacy and similar gains in the percentage of females going to secondary school (Table 3), which may be related to recent declines in MMR. However, the increasing maternal mortality in the 1990s was not mirrored by declining female literacy, and the effect of literacy on MMR may follow a significant time lag – enough for other changes intermediate to reduced MMR to manifest. Such results of improved female education could include changes in family and community dynamics that give women increased agency and control over their lives [41].

It may also be that there is a threshold level of female literacy that has to be surpassed in order for it to translate as reductions in maternal mortality via the catalysis of improved knowledge of pregnancy danger signs and the importance of skilled attendance at delivery. Above such a threshold a critical mass of knowledge may be reached within the poor communities of Malawi that contribute the most towards its high MMR.

### Female Life Expectancy at birth

Life expectancy at birth is an accurate proxy measure of the overall health of the population and therefore could also be an accurate predictor of maternal mortality [13]. From the available data the slight fall in female life expectancy during the 1980s and 1990s does match the rise in MMR during the same period and the rise in life expectancy in the early 2000s also matches the fall in MMR during this time, however the trends in life expectancy are less marked (Table 3). [The fact that the proportion of adult female deaths that were from maternal causes appears to have remained fairly constant, varying between 21.6% and 15.6% during 1986 to 2010 \(Table 3\), strengthens the case for an association between MMR and female life expectancy in Malawi. This association is plausible given that in Malawi, female life expectancy is dependent on a number of factors such as HIV and other diseases that are also linked to maternal mortality-MMR.](#)

### Adult Female Mortality

Adult Female Mortality (AFM) follows the same trend as MMR. This is not surprising considering that MMR is a subset of AFM as determined by the sisterhood method used in the DHS and MICS. Given that AFM is around 5 times higher than MMR there is a large scope for the MMR to be inflated by misclassification of non-maternal adult female deaths as maternal. Sisterhood methods estimate ‘pregnancy-related’ deaths during pregnancy and up to two months post-partum, irrespective of the cause. In Bolivia, where



AFM was around 11 per 1000 person-years between 1975-1988, the number of non-maternal-obstetric deaths included in MMR estimates using sisterhood methods was estimated by Stecklov to be over 30% [42]. Garenne recently improved Stecklov's method by including an HIV-prevalence-adjusted estimate of the relative-risk of non-obstetric mortality during the maternal risk period compared with the risk of mortality outside this period, and estimates the proportion of non-obstetric deaths included in the MMR for the Malawi DHS surveys to be 57% for 1992, 54% for 2000 and 62% for 2004, resulting in estimated obstetric MMRs of 299, 562 and 410, respectively [43]. A similar upward followed by downward trend is therefore observed for this estimate of obstetric mortality as well as for pregnancy-related mortality (which was estimated to be 10-15% higher using Garenne's method than the MMR published in the DHS reports). Because With a high prevalence of HIV and similar estimates of AFM in Malawi in 1997 and 2001, the proportion of non-maternal deaths included in maternal mortality estimates may be similar. However, the proportion of pregnancy-related deaths in HIV positive women that are incidental deaths and the remaining proportion that are indirect maternal-obstetric deaths remains unknown [15]. these estimates of obstetric MMR could be conservative. Failure to differentiate between maternal and non-maternal deaths may lead to inaccurate conclusions about trends and impact of public health interventions, as well as inadequate future interventions [44]. Disregarding potential misclassification bias, the DHS figures show MMR to have declined by an estimated 31% (from 984 to 675 maternal deaths per 100,000 livebirths) and AFM to have declined by an estimated 28% (from 11.6 to 8.4 deaths per 1000 women aged 15-49) between the 2004 survey and the 2010 survey [1 45]. Although the MMR decline appears slightly larger, suggesting a reduction in direct obstetric maternal deaths -as also suggested by application of Garenne's method- in addition to a reduction in HIV/AIDS-related maternal deaths (see below), given wide confidence intervals, we are not able to conclude that this was the case.

### HIV, AIDS and ART

Figure 1 shows that the estimated MMR due to HIV rises dramatically during the 1990s both in absolute terms and as a proportion of the total MMR as the HIV prevalence rises (Table 3). As the HIV prevalence levels off around the year 2000 and begins to slowly decline (Table 3) and incidence also declines [46], the proportion of MMR due to HIV slowly declines, declining more rapidly towards 2010 as the effect of the antiretroviral therapy programme takes hold [20 21]. The following paragraphs discuss the relationship between HIV and MMR in Malawi with reference to how it was calculated, biological plausibility and cause-specific mortality, regional variations, and the recent effect of the antiretroviral therapy programme.

The trend in MMR due to HIV depends on the HIV prevalence, the relative-risk (RR) of pregnancy-related mortality in HIV+ mothers compared to HIV- mothers [19] and impact of ART from 2004 onwards [20 47 48]. Further detail and explanation of the calculations involved are provided in Web Appendix 2. Although the RR of 7.74 is from a systematic-review and meta-analysis of 23 studies that were mainly facility-based [19], it is corroborated by a secondary analysis of population-based longitudinal cohort data from sub-Saharan Africa that estimates it to be 8.2 [49]. The fact the RR is for pregnancy-related mortality rather than maternal mortality is less of an issue given that the DHS and MICS estimates used to construct the trend line to which the RR is applied effectively measure pregnancy-related rather than maternal mortality. This also negates the issue of maternal deaths due to HIV not being formally recorded pre-2010, before the importance of HIV as an indirect cause of maternal death was recognised by the creation of [International Classification of Diseases 10 \(ICD10\) code O98.7](#) [4]. [Recent evidence from South Africa suggests HIV mortality is lower in pregnant women than age-matched non-](#)



1  
2  
3  
4  
5  
6 pregnant women indicating that many HIV deaths may be co-incident with pregnancy  
7 [50]. Nevertheless, it remains not possible to separate out indirect obstetric deaths due to  
8 HIV and incidental HIV deaths. All are captured, however, in the national-level  
9 pregnancy-related mortality MMR trends presented in this paper. The estimated  
10 proportion of MMR attributable to HIV takes no account of the effect of the HIV  
11 epidemic on the health system of Malawi, however, which includes exacerbation of the  
12 human resource crisis [51], and possibly also de-prioritisation of other health problems  
13 such as maternal health. Therefore it is likely to be an underestimate.

14  
15 Although HIV reduces the rate of conception resulting in fewer pregnancies, it is likely to  
16 increase maternal mortality due to a combination of: increases in direct obstetric deaths  
17 (due to increases in puerperal sepsis for example); increases in indirect obstetric deaths  
18 (due to complications of HIV aggravated by pregnancy); and, decreases in the quality of  
19 care available to all mothers as a result of less trained health workers being available at  
20 health facilities (as many die from AIDS) and a more prejudicial attitude of health  
21 workers towards those who they suspect of having HIV [52].

22  
23 If HIV were responsible for an increase in maternal deaths we would expect cause-  
24 specific mortality rates to reflect this. While few studies have had the capacity to verify  
25 maternal HIV status, the proportion of deaths due to infections such as puerperal sepsis  
26 and malaria [53] may be related to HIV. Hospital-based studies have shown an increase in  
27 the proportion of maternal deaths due to puerperal sepsis from 6/78 (8%) in 1989 and  
28 13/37 (18%) in 1990 [54] to 29% in 2005 [55]; both studies also finding HIV/AIDS  
29 (11% and 10% of maternal deaths in 1989 and 1990 respectively [54], percentage not  
30 stated in 2005 study) and other infections to be important contributors. A review of 43  
31 maternal deaths in hospitals in the central region in 2007 showed 16% were due to sepsis  
32 and attributed a further 16% to AIDS [56]. A recent study of 61 maternal deaths in a  
33 central region hospital during 2007-2011 found 12 (20%) were HIV positive, 10 of whom  
34 died of non-pregnancy-related infections including meningitis and pneumonia [57]. Such  
35 non-pregnancy-related infections would be included in the pregnancy-related mortality  
36 MMR trends presented in this paper. Another recent study of 32 maternal deaths in a  
37 tertiary hospital in Malawi in 2011 found 13 (40%) of the women were HIV positive, 9  
38 HIV negative and 10 with unknown HIV status; and classified 6 (19%) of the maternal  
39 deaths as due to sepsis and a further 3 (9%) due to HIV-related disease [58]. HIV  
40 infection may also predispose pregnant women to more severe malarial morbidity [59-61],  
41 but data related to trends in malaria-related maternal complications are limited.

42  
43 As noted earlier, the MMR in the Northern and Central Regions of Malawi was  
44 significantly lower than that in the Southern Region of Malawi between 2000-6 [23]. In  
45 2004, HIV prevalence was also significantly lower in these regions, with 10.4% (95%CI:  
46 7.8%, 13.8%), 6.6% (5.2%, 8.3%) and 19.8% (17.7%, 22.1%) in Northern, Central and  
47 Southern Regions respectively [45]. The trend in the MMR in urban and rural areas of  
48 Malawi between the first DHS survey (1986-1992) and the second DHS survey (1994-  
49 2000) was examined by Bicego and colleagues [62]. They found that the increases in  
50 MMR were statistically significant and concluded that they were related to increases in  
51 HIV during the same period.

52  
53 There is now growing evidence from Malawi and elsewhere in sub-Saharan Africa that  
54 the population-level effect of ART is significant in reducing adult mortality rates [47].  
55 The Malawian government Ministry of Health launched a national program providing free  
56 access to ART in 2004. By mid-2010, 359,771 people had been registered on ART,  
57 345,765 in the public sector [48], and there had been a rapid fall in mortality [20].

1  
2  
3  
4  
5  
6 Therefore part of the reason for the decline in MMR in Malawi after 2003 may have been  
7 the successful scaling-up of the ART program and a consequent reduction in direct and  
8 indirect maternal deaths related to HIV and AIDS. However, the main impact of ART is  
9 likely to have occurred later as it's roll-out only became significant from 2005, with  
10 coverage reaching 25-50% by 2007-2009 [46]. Although, as detailed in Web Appendix 2,  
11 the proportion of HIV positive women on ART needs to increase from the 35% observed  
12 in 2010 [63] for there to be more of an impact. Recent reports show a large increase to  
13 69% in the last quarter of 2012 however [64], and the adoption of 'Option B+' of treating  
14 all HIV positive pregnant women with antiretrovirals for life since 2011 shows great  
15 promise [21].

### 16 17 **Malaria and Anaemia**

18 Malaria in pregnancy has been linked to low birth weight and adverse outcomes for the  
19 baby and severe antenatal anaemia in the mother, and anti-malarial prophylaxis is  
20 recommended, especially for low parity women [7]. Anaemia may also be unrelated to  
21 malaria, being also the result of other infections such as hookworm or HIV, or nutritional  
22 deficiencies, for example [65]. Facility-based studies in Malawi have estimated anaemia  
23 to cause 7% of 43 maternal deaths [56], 12% of 165 maternal deaths [25]<sup>p140</sup>, 16% of 32  
24 maternal deaths [58] and 17% of 61 maternal deaths [57]. However With regard to  
25 Malaria, although studies in other malaria endemic countries have linked seasonal trends  
26 in maternal mortality to seasonal trends in malaria incidence [66 67], and a recent study in  
27 Kenya estimated 9% of 249 pregnancy-related deaths were due to malaria [68], the  
28 contribution of malaria to maternal mortality in Malawi remains unclear. Malaria control  
29 measures have increased in Malawi during the last decade of unchanged malaria  
30 transmission but have yet to reduce hospital admissions due to malaria in children [69 70].  
31 Current prophylaxis measures in pregnant women in Malawi may be insufficient too [71],  
32 suggesting the observed trend in maternal mortality in Malawi is unlikely to be due to  
33 changes in malaria or its prevention or treatment.

### 34 **Nutrition and stunting**

35 Under-nutrition during childhood and adolescence leads to stunting which puts women at  
36 risk of prolonged and obstructed labour and consequent ruptured uterus and haemorrhage,  
37 important causes of maternal mortality in Malawi [7]. The proportion of maternal deaths  
38 due to stunting remains unclear, however. Therefore the extent to which longitudinal  
39 improvements in nutritional status could reduce maternal mortality is unknown. Given the  
40 proportion of women with short stature has changed little (Table 3), stunting is unlikely to  
41 have played a major role in the observed rise and fall in MMR in Malawi.

## 42 43 **Discussion**

44 National estimates of maternal mortality in Malawi show a rising trend throughout the  
45 1980s and 1990s reaching a peak in the late 1990s from which it started to decline.  
46 Maternal mortality is difficult to measure accurately, and therefore the trends observed  
47 must be interpreted with caution. However, some measure of change is necessary for  
48 monitoring progress towards achieving the MDG for maternal health. Understanding what  
49 has contributed to the rise and fall of maternal mortality is also crucial. We hope this  
50 paper goes some way towards explaining both for the case of Malawi.

### 51 52 ***Why is the Maternal Mortality Ratio falling?***

1  
2  
3  
4  
5  
6 A paper by Muula and Phiri seeking to explain the rise in MMR between the 1992 and  
7 2000 DHS speculated that deterioration in health services resulting from the rise in HIV  
8 during this period (and the rise in HIV itself) were possibly to blame for the apparent 80%  
9 increase in MMR during this period [72]. The evidence we present in this paper suggests  
10 that the declining impact of HIV in Malawi may have contributed to the recent fall in  
11 maternal mortality. Muula and Phiri also speculated that an increase in poverty during the  
12 1990s could have contributed to an increase in MMR [72]. Malawi's economy has been  
13 more successful in recent years (Table 3) and poverty has perhaps decreased as a result  
14 [73]. Thus recent declines in maternal mortality could be related in part, to poverty  
15 reduction. However, the level of economic improvement required to drive a reduction in  
16 maternal mortality in Malawi remains unclear.

17  
18 The functioning of the health system is key. Although the proportion of women whose  
19 delivery was attended by a skilled health-worker has only changed in recent years, the  
20 competency of the health system may have changed throughout the last three decades. An  
21 audit of maternal deaths in the Southern Region concluded that the quality of obstetric  
22 care went down in Malawi in the 1990s [74] and in general it is perceived that the health  
23 system deteriorated significantly during the 1990s. Although infant mortality may have  
24 decreased slightly in the 1990s, other indicators of health system performance such as  
25 vaccination rates, pneumonia treatment and stunting got worse in the 1990s. [3 75 76].  
26 Reasons for this decline in quality included: the human resources crisis - overseas  
27 migration of nurses and midwives peaked in the late 1990s, internal rural to urban  
28 migration and HIV were also responsible for declining numbers of key obstetric health  
29 workers [51]; a closure of rural facilities – some of which have since reopened following  
30 the 2004-2010 emergency human resources plan, although the Hardship Allowance for  
31 attracting staff to rural areas was not implemented [77]; declining standards in schools  
32 resulting in insufficient candidates to fill nursing and medical schools; and, a lack of  
33 capable, efficient and un-corrupt leadership/strategic planning [40]. Some of these factors  
34 have improved in the last decade and could therefore be responsible for the turnaround in  
35 MMR. Other improvements were also made since the launch of the Safe Motherhood  
36 programme in the southern region in 1997 including more health education talks and  
37 information on safe motherhood [78], and initiatives to quicken referrals from rural health  
38 centres to hospitals [79 80]. Indicators of health system performance such as vaccination  
39 rates, pneumonia treatment and the proportion of under-5 children who are underweight  
40 or stunted have also improved in the last decade [3 75 76].

41 The Sector Wide Approach (SWAp) of 2004-2010, and increased per capita health  
42 funding (Table 3), has enabled increased coordination, investment, and provision of  
43 essential healthcare [81], including some increases in nursing and other staff resulting  
44 from the Emergency Human Resources Plan [77]. However, provision of maternity care  
45 was still less than half of what was required [81] and additional recent data suggests  
46 obstetric care services are still lacking in Malawi, especially at the peripheral health centre  
47 level ([33 82]), and shortages of staff and supplies are still acute [83]. The MMR would  
48 decline further if access to both basic and comprehensive emergency obstetric care could  
49 be improved further along with skilled attendance for all deliveries [33]. Clearly there is  
50 much still to do; but not just for poor rural women.

#### 51 *Urban, rural, richer, poorer*

52 The lower recent estimates from the MaiMwana and MaiKhanda population-based  
53 surveillance may also be partly due to the exclusion of urban populations in these studies  
54 [9 10]. Most health indicators in Malawi are better in urban areas [1 23 45], but Bicego et  
55 al suggest that urban maternal mortality became higher than rural maternal mortality  
56

1  
2  
3  
4  
5  
6 between the 1992 and 2000 DHS [62], and MICS 2006 reports slightly higher MMR in  
7 urban than in rural areas (Table 1), although also with widely overlapping confidence  
8 intervals. If true, this may be partly due to higher HIV prevalence in urban areas [62 84],  
9 and partly due to the loss of 'urban advantage' in maternal health now arising in urban  
10 populations in developing countries [85], although a lack of access to skilled delivery in  
11 rural areas would be expected to counterbalance the lower HIV-related maternal  
12 mortality. A flattening of the socioeconomic gradient for maternal and child mortality has  
13 been seen in Malawi and other countries with high HIV prevalence, with higher mortality  
14 in low socioeconomic groups due to lack of access to health care and higher mortality in  
15 high socioeconomic groups due to HIV [86 87].

### 16 **Policy Implications: Reaching MDG5 in Malawi**

17 Assuming the MMR in 1990 was 620 (95% CI 410-830) [3], then the MDG 5 targeted  
18 75% reduction for Malawi would mean an MMR of 155 (103-208) by 2015 [2 88].  
19 Alternatively, using the time trend analysis from this paper (Figure 1), MMR for 1990  
20 was approximately 750 (95% CI 550-950) corresponding to an MDG 5 target of 190 (95%  
21 CI: 140-240) by 2015. Despite these uncertainties as to what the MDG 5 target should be  
22 (the Countdown 2012 report sets the target for Malawi at 280 [76], basing it on the 1990  
23 estimate of 1100, which we dispute), it is clear that meeting the target will be difficult. It  
24 is often easier to reduce mortality from a high level to a less high level than from a low  
25 level to an even lower level. Meeting MDG5 in Malawi will also be difficult because of  
26 the rapid increase in MMR during the 1990s, possibly as a result of HIV. Both prevention  
27 and treatment of HIV are therefore also priorities in the fight against maternal mortality  
28 [89] and it is good to know that progress is now being made on both fronts [64]. If many  
29 of the extra deaths in the 1990s were due to HIV (either as incidental ~~HIV~~-deaths ~~rather~~  
30 ~~than~~ indirect maternal deaths complicated by HIV-disease, the two of which are  
31 difficult to distinguish [90]), greater reductions in direct obstetric maternal deaths are  
32 crucial. However, the target for attaining the 75% reduction is likely to be measured using  
33 similar sisterhood methods to the DHS and MICS, which will not adequately distinguish  
34 between pregnancy-related mortality and maternal mortality, whether due to HIV or  
35 otherwise.

36  
37 Translating the recent increase in institutional delivery in Malawi into increased quality of  
38 routine and emergency care during and after delivery must be prioritised as part of  
39 continued efforts towards the strengthening of the health system in Malawi [25 33].  
40 Prevention of maternal deaths through an increased focus on family planning and  
41 liberalising safe abortion services, and improving the timeliness of referrals from homes  
42 and health centres should also be priorities [27].

### 43 **Conclusion**

44  
45 From the best available evidence it appears that fewer mothers are dying in pregnancy,  
46 childbirth and the post-partum period in Malawi in recent years and that this is possibly  
47 the result of: increases in health facility delivery; improvements in the financing and  
48 management of the health system contributing to real gains in skilled delivery (in terms of  
49 the knowledge and skill of the increasingly available professionals involved and an  
50 enabling environment); improvements in awareness of women of danger signs of  
51 pregnancy, catalysed through increased adult female literacy in recent years; and, more  
52 recently, a reduction of HIV-related maternal mortality via a rapid roll-out of  
53 antiretroviral therapy. Despite this it must be stressed that at around 400 maternal deaths  
54  
55  
56

1  
2  
3  
4  
5  
6 per 100,000 livebirths the MMR in Malawi is still unacceptably high and much remains to  
7 be done to prevent maternal complications arising and improve the provision of obstetric  
8 care in the country. Considerable effort is required if Malawi is to achieve MDG 5 by  
9 having an MMR of 150 or less by the end of 2015 and if more mothers are going to  
10 survive in the coming years.

#### 11 12 13 **Funding**

14 This research received no specific grant from any funding agency in the public, commercial or not-for-profit  
15 sectors. TC and BN were funded by The Health Foundation from 2007 to 2011, and funded by the European  
16 Union, Bill and Melinda Gates Foundation, UK government Department for International Development  
17 (DFID) and the Wellcome Trust from 2011 onwards. SL was funded by DFID and the Wellcome Trust. IA  
18 was funded by the London School of Hygiene and Tropical Medicine.

#### 19 **Conflict of Interest**

20 All authors have no conflicts of interest

#### 21 **Author contributions**

22 TC conceived the study, carried out the literature review, gathered the data, carried out the analyses,  
23 contributed to their interpretation, wrote the first draft of the paper, and collated inputs to all subsequent  
24 drafts. SL contributed to the analysis and interpretation and revised the paper. BN, IA, AP and CM  
25 contributed to the interpretation of the analyses and added clinical and health systems perspectives to the  
26 narrative. AP and CM also added insights from their many years working in the Malawian health system.  
27 All authors reviewed and revised several iterations of the paper, contributed intellectual content and have  
28 seen and approved the final version of the paper.

#### 29 Acknowledgement

30 We thank Michel Garenne for his detailed and insightful review and suggestions, which improved the paper.

## References

1. National Statistical Office (NSO), ICF Macro. Malawi Demographic and Health Survey 2010. Zomba, Malawi, and Calverton, Maryland, USA: NSO and ICF Macro, 2011.
2. UN. Millennium Development Goal 5: Improve Maternal Health. Available at <http://www.un.org/millenniumgoals/maternal.shtml> (last accessed 29/10/2013).  
~~Secondary Millennium Development Goal 5: Improve Maternal Health. Available at <http://www.un.org/millenniumgoals/maternal.shtml> (last accessed 29/10/2013) 2013.~~
3. National Statistics Office Malawi, Macro International USA. Malawi Demographic and Health Survey 1992. Calverton, Maryland: NSO and Macro International Inc., 1994.
4. WHO. International statistical classification of diseases and related health problems. 10th Revision. Vol. 2. Instruction Manual. 2010 Edition. Geneva: World Health Organisation, 2010:134.
5. Khan KS, Wojdyla D, Say L, et al. WHO analysis of causes of maternal death: a systematic review. *Lancet* 2006;**367**(9516):1066-74 doi: 10.1016/S0140-6736(06)68397-9[published Online First: Epub Date].
6. Thaddeus S, Maine D. Too far to walk: maternal mortality in context. *Social Science & Medicine* 1994;**38**(8):1091-110
7. Bowie C, Geubbels E. Chapter 5 – The epidemiology of maternal mortality 2nd edition. The Epidemiology of Malawi. available at: [http://www.medcol.mw/commhealth/publications/epi\\_book/Maternal\\_health\\_v2\\_2.pdf](http://www.medcol.mw/commhealth/publications/epi_book/Maternal_health_v2_2.pdf) (accessed 29/10/2013): Department of Community Health, College of Medicine, Malawi, 2013.
8. Lewycka S, Mwansambo C, Kazembe P, et al. A cluster randomised controlled trial of the community effectiveness of two interventions in rural Malawi to improve health care and to reduce maternal, newborn and infant mortality. *Trials* 2010;**11**:88 doi: 10.1186/1745-6215-11-88[published Online First: Epub Date].
9. Lewycka S, Mwansambo C, Rosato M, et al. Effect of women's groups and volunteer peer counsellors on rates of mortality, morbidity and health behaviours in mothers and children in rural Malawi (MaiMwana): a factorial, cluster-randomised controlled trial. *Lancet* 2013;**381**:1721-35
10. Colbourn T, Nambiar B, Bondo A, et al. Effects of quality improvement in health facilities and community mobilisation through women's groups on maternal, neonatal and perinatal mortality in three districts of Malawi: MaiKhanda, a cluster randomised controlled effectiveness trial. *International Health* 2013;**5**(3):180-95
11. Newcombe RG. Interval estimation for the difference between independent proportions: comparison of eleven methods. *Statistics in Medicine* 1998;**17**(8):873-90
12. Stanton C, Abderrahim N, Hill K. An assessment of DHS maternal mortality indicators. *Studies in Family Planning*.31(2):111-23 2000
13. Hakkert R. Country estimates of maternal mortality: an alternative model. *Statistics in Medicine* 2001;**20**:3505-24
14. Buor D, Bream K. An Analysis of the Determinants of Maternal Mortality in Sub-Saharan Africa. *Journal of Women's Health* 2004;**13**(8):926-38
15. WHO, UNICEF, UNFPA, et al. Trends in Maternal Mortality: 1990 to 2010. Geneva: World Health Organisation, 2012.
16. Lozano R, Wang H, Foreman K, et al. Progress towards Millennium Development Goals 4 and 5 on maternal and child mortality: an updated systematic analysis. *Lancet* 2011;**378**:1139-65



17. Ronsmans C, Graham WJ, on behalf of The Lancet Maternal Survival Series steering group. Maternal Mortality: who, when, where, why. *Lancet* 2006;**368**:1189-200
18. Campbell OMR, Graham WJ, The Lancet Maternal Survival Series steering g. Maternal Survival 2. Strategies for reducing maternal mortality: getting on with what works. *Lancet* 2006;**368**(1284):1299
19. Calvert C, Ronsmans C. The contribution of HIV to pregnancy-related mortality: a systematic review and meta-analysis. *AIDS* 2013;**27**:Feb 25 [Epub ahead of print]
20. Mwangomba B, Zachariah R, Massaquoi M, et al. Mortality Reduction Associated with HIV/AIDS Care and Antiretroviral Treatment in Rural Malawi: Evidence from Registers, Coffin Sales and Funerals. *PLoS One* 2010;**5**(5):e10452
21. Fasawe O, Avila C, Shaffer N, et al. Cost-Effectiveness Analysis of Option B+ for HIV Prevention and Treatment of Mothers and Children in Malawi. *PLoS One* 2013;**8**(3):e57778
22. Stanton C, Abderrahim N, Hill K. DHS Maternal Mortality Indicators: An Assessment of Data Quality and Implications for Data Use. Calverton Maryland: Macro International Inc., 1997.
23. National Statistics Office [Malawi], UNICEF. Malawi Multiple Indicator Cluster Survey 2006, Final Report. Lilongwe, Malawi: National Statistical Office and UNICEF, 2008.
24. Rutstein SO, Rojas G. Guide to DHS Statistics. Calverton, Maryland, USA: Demographic and Health Surveys, ORC Macro, 2006.
25. Colbourn T, Nambiar B, Costello A. MaiKhanda - Final evaluation report. The impact of quality improvement at health facilities and community mobilisation by women's groups on birth outcomes: an effectiveness study in three districts of Malawi. Available at <http://www.health.org.uk/publications/maikhanda/> (accessed 29/10/2013). London: The Health Foundation, 2013:1-364.
26. National Institute of Population Research and Training (NIPORT) OM, University JH, B. I. Bangladesh Maternal Health Services and Maternal Mortality Survey 2001. Dhaka, Bangladesh and Calverton, Maryland (USA): NIPORT, ORC Macro, Johns Hopkins University, and ICDDR,B., 2003.
27. Anwar ATMI. Case studies to understand variations in levels of maternal mortality between Bangladesh and Malawi. Doctoral thesis. London School of Hygiene and Tropical Medicine (LSHTM), 2012.
28. Suvedi, Krishna B, A. P, et al. Nepal Maternal Mortality and Morbidity Study 2008/2009: Summary of Preliminary Findings. Kathmandu, Nepal: Family Health division, Department of Health Services, Ministry of Health, Government of Nepal, 2009.
29. Ministry of Health and Population (MOHP) [Nepal], New ERA, ICF International Inc. Nepal Demographic and Health Survey 2011. Kathmandu, Nepal: Ministry of Health and Population, New ERA, and ICF International, Calverton, Maryland., 2012.
30. Graham WJ, Bell JS, Bullough CHW. Can skilled attendance at delivery reduce maternal mortality in developing countries. *Studies in HSO&P* 2001;**17**(97):130
31. Harvey SA, Blandón YCW, McCaw-Binns A, et al. Are skilled birth attendants really skilled? A measurement method, some disturbing results and a potential way forward. *Bulletin of the World Health Organisation* 2007;**85**(10):783-90
32. Ronsmans C, Van Damme W, Filippi V, et al. Need for caesarean sections in west Africa. *Lancet* 2002;**359**:974
33. Republic of Malawi Ministry of Health. Malawi 2010 EmONC Needs Assessment Final Report, 2010.
34. van Amelsfoort JJ, van Leeuwen PA, Jiskoot P, et al. Surgery in Malawi--the training of clinical officers. *Tropical Doctor* 2010;**40**(2):74-76

- 1  
2  
3  
4  
5  
6 35. Wilhelm TJ, Thawe IK, Mwatibu B, et al. Efficacy of major general surgery performed by non-physician clinicians at a central hospital in Malawi. *Tropical Doctor* 2011;**41**(2):71-75
- 7  
8  
9 36. Chilopora G, Pereira C, Kamwendo F, et al. Postoperative outcome of caesarean sections and other major emergency obstetric surgery by clinical officers and medical officers in Malawi. *Human Resources for Health* 2007;**5**:17
- 10  
11  
12 37. Chowdhury M, Ahmed A, Kalim N, et al. Causes of maternal mortality decline in Matlab, Bangladesh. *Journal of Health, Population & Nutrition*. 2009;**27**(2):108-23
- 13  
14  
15 38. Winikoff B, Sullivan M. Assessing the role of family planning in reducing maternal mortality. *Studies in Family Planning*.18(3):128-43 1987:Jun
- 16  
17  
18 39. Cleland J, Bernstein S, Ezeh A, et al. Family planning: the unfinished agenda. *Lancet* 2006;**368**:1810-27
- 19  
20  
21 40. McCoy D, Ashwood-Smith H, Ratsma E, et al. Going from bad to worse: Malawi's maternal mortality. An analysis of the clinical, health systems and underlying reasons, with recommendations for national and international stakeholders: Commissioned by Task Force 4 of the UN Millenium Project, 2004.
- 22  
23  
24 41. Karlson S, Say L, Souza J-P, et al. The relationship between maternal education and mortality among women giving birth in health care institutions: Analysis of the cross sectional WHO Global Survey on Maternal and Perinatal Health. *BMC Public Health* 2011;**11**:606
- 25  
26  
27 42. Stecklov G. Maternal Mortality Estimation: Separating Pregnancy-Related and Non- Pregnancy-Related Risks. *Studies in Family Planning* 1995;**26**(1):33-38
- 28  
29  
30 43. Garenne M. Estimating Obstetric Mortality from Pregnancy-Related Deaths Recorded in Demographic Censuses and Surveys. *Studies in Family Planning* 2011;**42**(4):237-46
- 31  
32  
33 44. Cross S, Bell JS, Graham WJ. What you count is what you target: the implications of maternal death classification for tracking progress towards reducing maternal mortality in developing countries. *Bulletin of the World Health Organization* 2010;**88**(2):147-53 doi: 10.2471/BLT.09.063537[published Online First: Epub Date].
- 34  
35  
36 45. National Statistics Office (NSO) [Malawi], ORC Macro [USA]. Malawi Demographic and Health Survey 2004. Calverton, Maryland: NSO and ORC Macro, 2005.
- 37  
38  
39 46. UNAIDS. Malawi HIV epidemiological factsheet. 2011 31/05/2011. <http://www.unaids.org/en/dataanalysis/epidemiology/epidemiologicalfactsheets/> (accessed 31/05/2011).
- 40  
41  
42 47. Jahn A, Floyd S, Crampin AC, et al. Population-level effect of HIV on adult mortality and early evidence of reversal after introduction of antiretroviral therapy in Malawi. *Lancet* 2008;**371**:1603-11
- 43  
44  
45 48. Harries A, Makombe S, Libamba E, et al. Why Did the Scale-up of HIV Treatment Work?: A Case Example From Malawi. *Journal Of Acquired Immune Deficiency Syndromes* 2011;**2011**(57):S64-S67
- 46  
47  
48 49. Zaba B, Calvert C, Marston M, et al. Effect of HIV infection on pregnancy-related mortality in sub-Saharan Africa: secondary analyses of pooled community- based data from the network for Analysing Longitudinal Population-based HIV/AIDS data on Africa (ALPHA). *Lancet* 2013;**381**:1763–71
- 49  
50  
51 50. Garenne M, Kathleen K, Collinson M, et al. Protective Effect of Pregnancy in Rural South Africa: Questioning the Concept of “Indirect Cause” of Maternal Death. *PLoS One* 2013;**8**(5):e64414
- 52  
53  
54 51. McCoy D, McPake B, Mwapasa V. The double burden of human resource and HIV crises: a case study of Malawi. *Human Resources for Health* 2008;**6**(16):doi:10.1186/478-4491-6-16
- 55  
56  
57  
58  
59  
60

- 1  
2  
3  
4  
5  
6 52. Graham WJ, Hussein J. Measuring and Estimating Maternal Mortality in the era of HIV/AIDS. Workshop on HIV/AIDS and Adult Mortality in Developing Countries: Population Division, Department of Economic and Social Affairs, United Nations Secretariat, 2003.
- 7  
8  
9 53. González R, Ataíde R, Nanche D, et al. HIV and malaria interactions: where do we stand? Expert Review of Anti-infective Therapy 2012;**10**(2):153-65
- 10  
11 54. Wiebenga JE. Maternal mortality at Queen Elizabeth Central Hospital, 1989 to 1990. Malawi Medical Journal.8(1):19-23 1992
- 12  
13  
14 55. Lema VM, Changole J, Kanyighe C, et al. Maternal mortality at the Queen Elizabeth Central Teaching Hospital, Blantyre, Malawi.[see comment]. East African Medical Journal.82(1):3-9 2005
- 15  
16  
17 56. Kongnyuy EJ, Mlava G, van den BN. Facility-based maternal death review in three districts in the central region of Malawi an analysis of causes and characteristics of maternal deaths. Womens Health Issues. 2009(1):14-20
- 18  
19  
20 57. Vink NM, de Jonge HCC, Ter Haar R, et al. Maternal death reviews at a rural hospital in Malawi. International Journal of Gynaecology & Obstetrics 2013;**120**(74-77)
- 21  
22  
23 58. Combs Thorsen V, Sundby J, Malata A. Piecing Together the Maternal Death Puzzle through Narratives: The Three Delays Model Revisited. PLoS One 2012;**7**(12):e52090
- 24  
25  
26 59. Ticconi C, Mapfumo M, Dorrucchi M, et al. Effect of maternal HIV and malaria infection on pregnancy and perinatal outcome in Zimbabwe. J Acquir Immune Defic Syndr 2003;**34**(3):289-94
- 27  
28  
29 60. Nkhoma ET, Bowman NM, Kalilani-Phiri L, et al. The effect of HIV infection on the risk, frequency, and intensity of Plasmodium falciparum parasitemia in primigravid and multigravid women in Malawi. American Journal of Tropical Medicine and Hygiene 2012;**87**(6):1022-7
- 30  
31  
32 61. Tonga C, Kimbi HK, Anchang-Kimbi JK, et al. Malaria risk factors in women on intermittent preventive treatment at delivery and their effects on pregnancy outcome in sanaga-maritime, cameroon. PLoS One 2013;**8**(6):e65876
- 33  
34  
35 62. Bicego, George, Boerma, et al. The effect of AIDS on maternal mortality in Malawi and Zimbabwe. AIDS 2002;**16**(7):1078-81
- 36  
37 63. Government of Malawi Ministry of Health. Quarterly HIV Programme Report: April - June 2010. Available at: [http://www.hivunitmohmw.org/uploads/Main/Quarterly HIV Programme Report 2010 Q2.pdf](http://www.hivunitmohmw.org/uploads/Main/Quarterly_HIV_Programme_Report_2010_Q2.pdf) (accessed 29/10/2013), 2010.
- 38  
39  
40 64. Government of Malawi Ministry of Health. Integrated HIV Program Report: October –December 2012. Available at: [http://www.hivunitmohmw.org/uploads/Main/Quarterly HIV Programme Report 2012 Q4.pdf](http://www.hivunitmohmw.org/uploads/Main/Quarterly_HIV_Programme_Report_2012_Q4.pdf) (accessed 29/10/2013), 2012.
- 41  
42  
43  
44 65. Munasinghe S, van den Broek N. Chapter 9 – Anaemia in Pregnancy in Malawi - A Review. The Epidemiology of Malawi. available at: [http://www.medcol.mw/commhealth/publications/epi book/Anaemia in pregnancy chapter 9.pdf](http://www.medcol.mw/commhealth/publications/epi_book/Anaemia_in_pregnancy_chapter_9.pdf) (accessed 30/10/2013): Department of Community Health, College of Medicine, Malawi, 2013.
- 45  
46  
47  
48  
49 66. Etard JF, Kodio B, Ronsmans C. Seasonal variation in direct obstetric mortality in rural Senegal: Role of Malaria? American Journal of Tropical Medicine & Hygiene 2003;**68**(4):503-4
- 50  
51  
52 67. Anya SE. Seasonal variation in the risk and causes of maternal death in the Gambia: Malaria appears to be an important factor. American Journal of Tropical Medicine & Hygiene 2004;**70**(5):510-13
- 53  
54  
55  
56  
57  
58  
59  
60

- 1  
2  
3  
4  
5  
6 68. Desai M, Phillips-Howard PA, Odhiambo FO, et al. An Analysis of Pregnancy-Related Mortality in the  
7 KEMRI/CDC Health and Demographic Surveillance System in Western Kenya. *PLoS One*  
8 2013;**8**(7):e68733
- 9  
10 69. Roca-Feltrer A, Kwizombe CJ, Sanjoaquin MA, et al. Lack of Decline in Childhood Malaria, Malawi,  
11 2001–2010. *Emerging Infectious Diseases* 2012;**18**(2):272-78
- 12  
13 70. Okiro EA, Kazembe LN, Kabaria CW, et al. Childhood Malaria Admission Rates to Four Hospitals in  
14 Malawi between 2000 and 2010. *PLoS One* 2013;**8**(4):e62214
- 15  
16 71. Gutman J, Mwandama D, Wiegand RE, et al. Effectiveness of Intermittent Preventive Treatment With  
17 Sulfadoxine-Pyrimethamine During Pregnancy on Maternal and Birth Outcomes in Machinga  
18 District, Malawi. *Journal of Infectious Diseases* 2013:[Epub ahead of print]
- 19  
20 72. Muula AS, Phiri A. Did Maternal Mortality Ratio increase in Malawi between 1992-1998? Review of  
21 the Malawi Demographic and Health Surveys and other data sources. *Tropical Doctor*  
22 2003;**33**:182-85
- 23  
24 73. World Bank. Poverty gap at \$1.25 a day (PPP) (%), Malawi 1998: 46%, 2004: 32%, 2010: 26%. World  
25 DataBank, World Development Indicators  
26 (<http://datbank.worldbank.org/data/views/reports/chart.aspx>; accessed 14/08/2013),  
27 2013.
- 28  
29 74. Ratsma E, Lungu K, Hofman J, et al. Why more mothers die: confidential enquiries into institutional  
30 maternal deaths in the Southern Region of Malawi. *Malawi Medical Journal* 2005;**17**(3):75-80
- 31  
32 75. National Statistics Office M, Macro International USA. Malawi Demographic and Health Survey 2000.  
33 Zomba, Malawi and Calverton, Maryland, US: NSO and Macro International Inc., 2001.
- 34  
35 76. WHO, UNICEF. Countdown to 2015, Maternal, Newborn and Child Survival: Building a Brighter  
36 Future for Women and Children, The 2012 Report, 2012.
- 37  
38 77. Department for International Development (DFID), Management Sciences for Health (MSH),  
39 Management Solutions Consulting (MSC) Limited. Evaluation of Malawi's Emergency Human  
40 Resources Programme, 2010.
- 41  
42 78. Hussein J, Goodburn EA, Damisoni H, et al. Monitoring obstetric services: Putting the 'UN guidelines'  
43 into practice in Malawi: 3 Years on. *International Journal of Gynecology and Obstetrics*  
44 2001;**75**(1):63-73
- 45  
46 79. Lungu K, Ratsma Y. Does the upgrading of the radio communications network in health facilities reduce  
47 the delay in the referral of obstetric emergencies in Southern Malawi? *Malawi Medical Journal*  
48 2007;**19**(1):1-8
- 49  
50 80. Hofman J, Dzimidzi C, Lungu K, et al. Motorcycle ambulances for referral of obstetric emergencies in  
51 rural Malawi: Do they reduce delay and what do they cost? *International Journal of Gynecology  
52 and Obstetrics* 2008;**102**(191–197)
- 53  
54 81. Bowie C, Mwase T. Assessing the use of an essential health package in a sector wide approach in  
55 Malawi. *Health Research Policy and Systems* 2011;**9**(4)
- 56  
57 82. Leigh B, Mwale TG, Lazaro D, et al. Emergency obstetric care: How do we stand in Malawi?  
58 *International Journal of Gynecology and Obstetrics* 2008;**101**:107-11
- 59  
60 83. Mueller DH, Lungu D, Acharya A, et al. Constraints to implementing the Essential Health Package in  
61 Malawi. *PLoS One* 2011;**6**(6)
84. National AIDS Commission. Estimating National HIV Prevalence in Malawi from Sentinel Surveillance  
Data. Technical Report. Lilongwe, Malawi, 2003.

- 1  
2  
3  
4  
5  
6 85. Matthews Z, Channon A, Neal S, et al. Examining the "urban advantage" in maternal health care in  
7 developing countries. *PLoS medicine* 2010;**7**(9) doi: 10.1371/journal.pmed.1000327[published  
8 Online First: Epub Date].
- 9  
10 86. Jahn A, Floyd S, McGrath N, et al. Child mortality in rural Malawi: HIV closes the survival gap  
11 between the socio-economic strata. *PLoS One* 2010;**5**(6):e11320 doi:  
12 10.1371/journal.pone.0011320[published Online First: Epub Date].
- 13  
14 87. Mann G, Bokasi M, Sangala W. Why are pregnant women dying? An equity analysis of maternal  
15 mortality in Malawi. *Malawi Medical Journal* 2006;**18**(1):32-38
- 16  
17 88. UNICEF. The Situation of Women and Children in Malawi.  
18 <http://www.unicef.org/malawi/children.html> (Accessed 15/08/2013), 2013.
- 19  
20 89. Graham W, Newell ML. Seizing the opportunity: collaborative initiatives to reduce HIV and maternal  
21 mortality. *Lancet* 1999;**353**:836-39
- 22  
23 90. Garenne M, Kathleen K, Collinson M, et al. Maternal mortality in rural South Africa: the impact of case  
24 definition on levels and trends. *International Journal of Women's Health* 2013;**3**(5):457-63
- 25  
26 91. Chipangwi JD, Zamaere TP, Graham WJ, et al. Maternal mortality in the Thyolo District of southern  
27 Malawi. *East African Medical Journal* 1992;**69**(12):675-9
- 28  
29 92. McDermott JM, Slutsker L, Steketee RW, et al. Prospective assessment of mortality among a cohort of  
30 pregnant women in rural Malawi. *American Journal of Tropical Medicine & Hygiene*.55(1  
31 Suppl):66-70 1996
- 32  
33 93. Beltman JJ, van den Akker T, Lam E, et al. Repetition of a sisterhood survey at district level in Malawi:  
34 the challenge to achieve MDG 5. *BMJ Open* 2011;**1**(e000080) doi: D - NLM: PMC3191428  
35 EDAT- 2011/10/25 06:00 MHDA- 2011/10/25 06:01 CRDT- 2011/10/25 06:00 PHST- 2011/05/05  
36 [aheadofprint] AID - bmjopen-2011-000080 [pii] AID - 10.1136/bmjopen-2011-000080 [doi] PST  
37 - epublish[published Online First: Epub Date].
- 38  
39 94. van den Broek NR, White SA, Ntonya C, et al. Reproductive health in rural Malawi: a population-based  
40 survey. *BJOG: An International Journal of Obstetrics & Gynaecology*.110(10):902-8 2003
- 41  
42 95. National Statistical Office (NSO). Malawi Family Formation Survey. Zomba, Malawi: Government  
43 Printer, 1984.
- 44  
45 96. World Bank. World DataBank. World Development Indicators, Malawi (available at:  
46 <http://databank.worldbank.org/data/views/reports/chart.aspx> (accessed 13/08/2013).
- 47  
48 97. World Health Organisation. WHO Statistical Information System Database (available at:  
49 <http://apps.who.int/whosis/data/Search.jsp> (accessed 13/08/2013).
- 50  
51 98. National Aids Commission. Estimating National HIV Prevalence in Malawi from Sentinel Surveillance  
52 Data: Technical Report. Lilongwe, Malawi; October 2003. Lilongwe, Malawi, 2003.
- 53  
54  
55  
56  
57  
58  
59  
60

**Figure 1: Trends in maternal mortality in Malawi and its Southern, Central and Northern regions, and estimated maternal mortality due to HIV, 1977 to 2010**

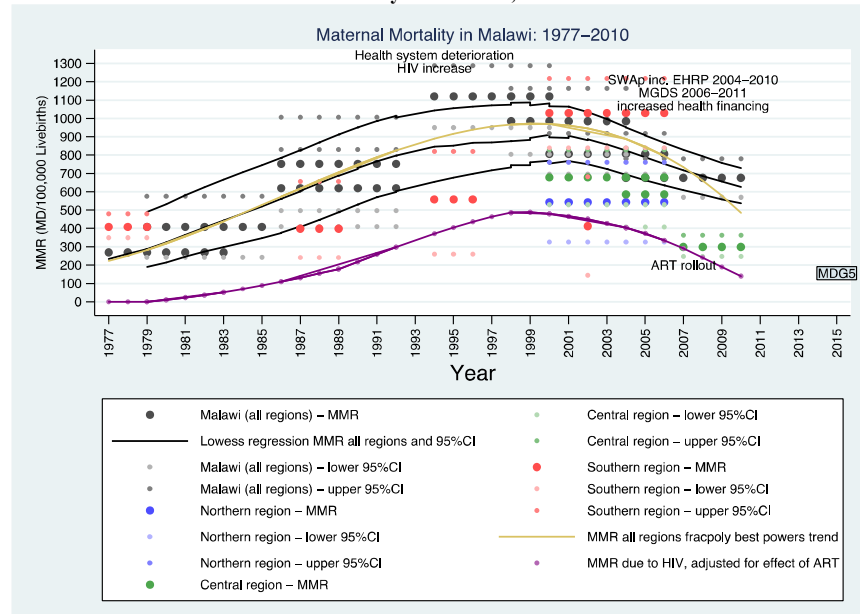

Formatted: Font: 14 pt

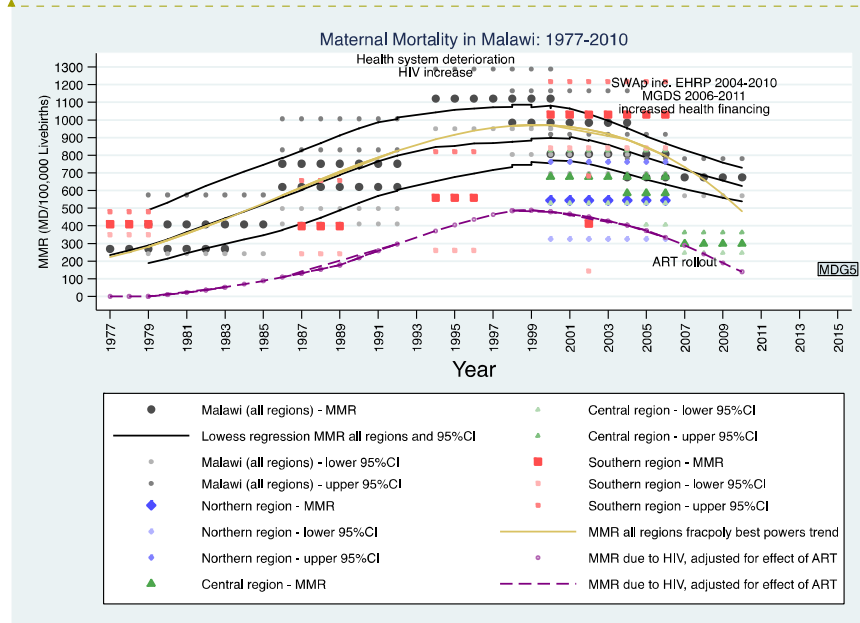

Formatted: Font: 14 pt



Figure 2: Overview of variables linked to maternal mortality in Malawi

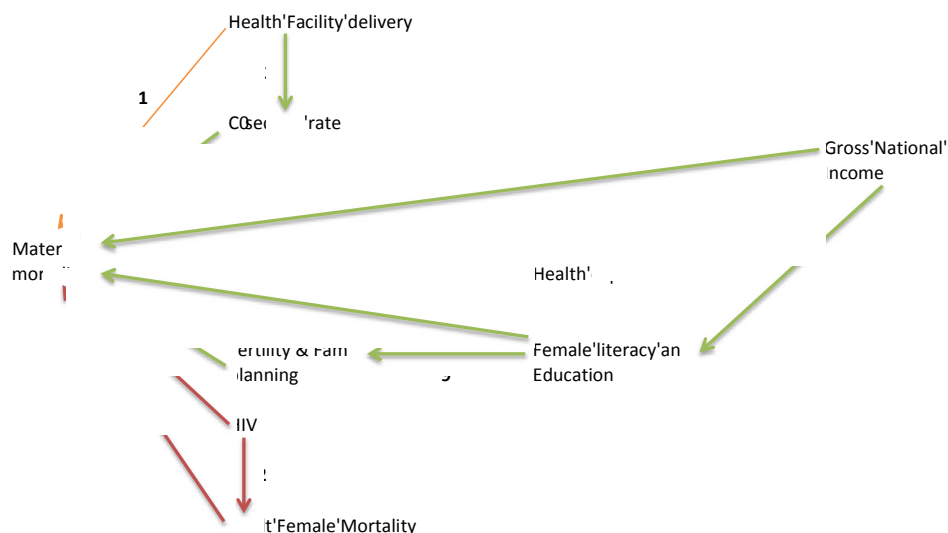

Overview of variables linked to maternal mortality in Malawi. Green arrows show beneficial effects, red arrows negative effects and orange arrows positive and negative effects

1 Increased health facility delivery could reduce maternal mortality by improving skilled birth attendance, however, overcrowding could reduce quality of care and increase maternal case fatality rates in health facilities

2 Caesarean sections only occur in health facilities and are likely to increase as health facility deliveries increase. If undertaken for life saving purposes such an increase could reduce maternal mortality

3 As the Caesarean section rate increases towards the WHO recommended minimum of 5% of deliveries more women who need emergency Caesarean sections are likely to get them and therefore be more likely to survive severe complications of delivery

4 Large increases in GNI could independently reduce maternal mortality via leading to many improvements in living conditions, as well as via increased health expenditure (5) and increased spending on education leading to improved female literacy and education (6)

7 Increased health expenditure should improve the functioning of the health system leading to reduced maternal mortality via improved quality of antenatal, obstetric and postnatal care

8 Increased female literacy and education should lead to reduced maternal mortality via allowing improved knowledge of maternal health problems, importance of health care and birth preparedness as well as improved family planning and reduced fertility (9)

10 Increases in family planning practices will reduce fertility i.e. reduce exposure to pregnancy and child birth

11 HIV contributes to both indirect and direct maternal mortality and via deaths from AIDS is responsible for a subset of total adult female mortality (12) which can be conflated with maternal mortality (13) if deaths coincidental with pregnancy but not related to it are included

**Table 1. Population-based Studies and Analyses of Maternal Mortality in Malawi**

| Study                                   | Year      | Method                           | Case Definition                                                                                                                                  | Location                                                       | Maternal Deaths | MMR (95% CI) <sup>a</sup>        |
|-----------------------------------------|-----------|----------------------------------|--------------------------------------------------------------------------------------------------------------------------------------------------|----------------------------------------------------------------|-----------------|----------------------------------|
| Chiphangwi (1992) [91]                  | 1977-1979 | Indirect Sisterhood <sup>b</sup> | Deaths of sisters who died "during pregnancy, childbirth or within 6 weeks of giving birth"                                                      | Southern Region (Thyolo district)                              | 150             | <b>409</b> (349-480)             |
| Malawi DHS 1992 (re-analysis) [22]      | 1977-1983 | Direct Sisterhood                | Deaths during pregnancy, childbirth and up to 6-weeks afterwards                                                                                 | Malawi (all regions)                                           |                 | <b>269</b> (??)                  |
| Malawi DHS 1992 (re-analysis) [22]      | 1979-1985 | Direct Sisterhood                | (as above)                                                                                                                                       | Malawi (all regions)                                           | 42              | <b>408</b> (242-575)             |
| McDermot 1996 [92]                      | 1987-1989 | Prospective Cohort               | (as above)<br><del>(as above) All deaths during pregnancy, childbirth and up to 6 weeks after (not excluding accidental/incidental deaths)</del> | Southern Region (Mangochi district)                            | 15              | <b>398</b> (241-656)             |
| Malawi DHS 1992 <sup>c</sup> [3]        | 1986-1992 | Direct Sisterhood                | (as above)                                                                                                                                       | Malawi (all regions)                                           | 71              | <b>620<sup>d</sup></b> (410-830) |
| Malawi DHS 1992 (re-analysis) [22]      | 1986-1992 | Direct Sisterhood                | (as above)                                                                                                                                       | Malawi (all regions)                                           | 82              | <b>752</b> (497-1006)            |
| Beltman 2011 [93]                       | 1994-1996 | Indirect Sisterhood <sup>b</sup> | Deaths of sisters who died "during pregnancy, childbirth or within 6 weeks of giving birth"                                                      | Southern Region (Thyolo district)                              | 84              | <b>558</b> (260-820)             |
| Malawi DHS 2000 <sup>e</sup> [75]       | 1994-2000 | Direct Sisterhood                | Deaths during pregnancy, childbirth and up to 2-months afterwards                                                                                | Malawi (all regions)                                           | 344             | <b>1120</b> (950-1288)           |
| Malawi DHS 2004 <sup>e</sup> [45]       | 1998-2004 | Direct Sisterhood                | Deaths during pregnancy, childbirth and up to 2-months afterwards                                                                                | Malawi (all regions)                                           | 240             | <b>984</b> (804-1164)            |
| MICS 2006 <sup>e</sup> [23]             | 2000-2006 | Direct Sisterhood                | Deaths during pregnancy, childbirth and up to 2-months afterwards                                                                                | Northern Region                                                | 33              | <b>543</b> (325-761)             |
|                                         |           |                                  |                                                                                                                                                  | Central Region                                                 | 190             | <b>678</b> (529-828)             |
|                                         |           |                                  |                                                                                                                                                  | Southern Region                                                | 246             | <b>1029</b> (840-1217)           |
|                                         |           |                                  |                                                                                                                                                  | Urban Malawi                                                   | 77              | <b>861</b> (492-1230)            |
|                                         |           |                                  |                                                                                                                                                  | Rural Malawi                                                   | 392             | <b>802</b> (689-915)             |
| Malawi (all regions)                    | 469       | <b>807</b> (696-918)             |                                                                                                                                                  |                                                                |                 |                                  |
| van den Broek 2003 [94]                 | 2002      | Household Survey                 | "The death of a woman associated with childbirth". Timing not stated.                                                                            | Southern Region (rural)                                        | 9               | <b>413</b> (144-682)             |
| Malawi DHS 2010 <sup>e</sup> [1]        | 2004-2010 | Direct Sisterhood                | Deaths during pregnancy, childbirth and up to 2-months afterwards                                                                                | Malawi (all regions)                                           | 331             | <b>675</b> (570-780)             |
| MaiMwana (control arm) [9]              | 2006-2009 | Surveillance (Prospective)       | WHO ICD-10 maternal death (see Background section). All 29 maternal deaths were verified by verbal autopsy.                                      | Central Region (Mchinji district, rural)                       | 29              | <b>585</b> (407-838)             |
| MaiKhanda (total <sup>f</sup> ) [10 25] | 2007-2010 | Surveillance (Prospective)       | WHO ICD-10 maternal death (see Background section), 51/102 (50%) verified by verbal autopsy, the rest verified by call-backs to community.       | Central Region (Kasungu, Lilongwe and Salima districts, rural) | 102             | <b>299</b> (247-363)             |

<sup>a</sup>calculated as (100,000 / MMR)\*Maternal deaths; for sisterhood studies calculated as ((maternal deaths / exposure years) / general fertility rate) \* 100,000

Shouldn't be compared with direct sisterhood method as although the reference period is on average 12 years before the survey it includes more recent deaths, which will bias the 12-year old estimate upwards given that the MMR in Malawi increased in the 1990s.

<sup>c</sup> The lower 95%CI of the MMR is calculated from the upper 95%CI of the GFR (less deaths per more births) and visa-versa. Fertility is only reported for the whole sample in the MICS survey, therefore only the whole sample MMR (Malawi (all regions)) could be recalculated.

<sup>d</sup>In the 1992 DHS the GFR used to calculate MMR is stated as 0.220 (Table 11.4, page 123). However in Chapter 3 on Fertility the total GFR is stated as 223 per 1000 women (or 0.223; Table 3.1 page 19) but this is for women aged 15-44 only. Using the raw data on number of women interviewed weighted by population of each cluster (district) so that the sample is representative of the whole of Malawi (Table 2.8.2 page 15) results in a Total GFR per woman aged 15-49 of 0.208 which is different to the 0.220 used to arrive at the MMR of 620 produced in the report.

<sup>e</sup>Given the MaiKhanda trial showed no effect of either of the interventions on maternal mortality

1  
2  
3  
4  
5  
6  
7  
8  
9  
10  
11  
12  
13  
14  
15  
16  
17  
18  
19  
20  
21  
22  
23  
24  
25  
26  
27  
28  
29  
30  
31  
32  
33  
34  
35  
36  
37  
38  
39  
40  
41  
42  
43  
44  
45  
46  
47  
48  
49  
50  
51  
52  
53  
54  
55  
56  
57  
58  
59  
60

Table 2: Comparison of estimated trends in the maternal mortality ratio in Malawi from 1990 to 2010

| 1977 | 1990 | 1995 | 2000 | 2005 | 2010 | Source                                       |
|------|------|------|------|------|------|----------------------------------------------|
| 223  | 748  | 916  | 970  | 846  | 484  | This paper, all years of survey <sup>a</sup> |
|      | 606  |      | 1397 |      | 422  | IHME                                         |
|      | 1100 | 1000 | 840  | 630  | 460  | MMEIG                                        |

<sup>a</sup>Best-fitting fractional polynomial transformation of MMR by year, using estimates for all years covered by each survey, see Web Appendix 1 for explanation

Formatted Table

For peer review only

Table 3. Changes in variables hypothesised to be associated with changes in maternal mortality in Malawi

| Variable                                                                                    | Trend: Year |                         |                         |                         |                         |                        |
|---------------------------------------------------------------------------------------------|-------------|-------------------------|-------------------------|-------------------------|-------------------------|------------------------|
|                                                                                             | 1982        | 1989                    | 1997                    | 2001                    | 2003                    | 2007                   |
| MMR (approximate from Figure 1)                                                             | 400         | 700                     | 950                     | 950                     | 800                     | 700                    |
| % deliveries by skilled attendant                                                           |             | 55.5% [3]               | 55.6% [75]              | 57% [45]                | 54% [23]                | 71.4% [1]              |
| % of deliveries by TBA                                                                      |             | 17.7% [3]               | 22.7% [75]              | 26.2% [45]              | 28.8% [23]              | 14.4% [1]              |
| % of deliveries by Relative / other person                                                  |             | 21.8% [3]               | 19.0% [75]              | 14.2% [45]              | 13.0% [23]              | 8.7% [1]               |
| % of deliveries alone                                                                       |             | 5.0% [3]                | 2.4% [75]               | 2.1% [45]               | 2.4% [23]               | 2.6% [1]               |
| % of deliveries by C-Section                                                                |             | 3.4% [3] <sup>a</sup>   | 2.8% [75] <sup>a</sup>  | 3.1% [45] <sup>a</sup>  | 2.8% [82] <sup>a</sup>  | 4.6% [1]               |
| Total Fertility Rate (TFR) <sup>b</sup>                                                     | 7.6 [95]    | 6.7 [3]                 | 6.3 [75]                | 6.0 [45]                | 6.3 [23]                | 5.7 [1]                |
| General Fertility Rate (GFR) <sup>c</sup>                                                   | 0.264 [95]  | 0.223 [3]               | 0.223 [75]              | 0.215 [45]              | 0.225 [23]              | 0.202 [1]              |
| Unmet need for FP services (%)                                                              |             | 36% [3]                 | 30% [75]                | 28% [7]                 |                         | 26% [1]                |
| Contraceptive prevalence rate (%)                                                           |             | 13.0% [3]               | 32.5% [75]              | 32.5% [7]               | 41% [8]                 | 42.2% [1]              |
| GNI per capita (Atlas method, current US\$)                                                 | \$180 [96]  | \$160 [96]              | \$200 [96]              | \$140 [96]              | \$190 [96]              | \$250 [96]             |
| GNI per capita, Purchasing Power Parity (PPP) (current International \$)                    | \$330 [96]  | \$380 [96]              | \$550 [96]              | \$550 [96]              | \$580 [96]              | \$710 [96]             |
| Per capita Total expenditure on health (average exchange rate US\$)                         |             |                         | \$20 [97]               | \$11 [97]               | \$18 [97]               | \$20 [97] <sup>d</sup> |
| Per capita Total expenditure on health (PPP, international \$)                              |             |                         | \$35 [97]               | \$34 [97]               | \$60 [97]               | \$70 [97] <sup>d</sup> |
| Per capita Government expenditure on health (average exchange rate US\$)                    |             |                         | \$6 [97]                | \$7 [97]                | \$13 [97]               | \$15 [97] <sup>d</sup> |
| Per capita Government expenditure on health (PPP, international \$)                         |             |                         | \$10 [97]               | \$21 [97]               | \$45 [97]               | \$51 [97] <sup>d</sup> |
| External Resources for Health as a Percentage of Total expenditure on health                |             |                         | 19.5% [97]              | 42.4% [97]              | 61.6% [97]              |                        |
| Female literacy rate (ages 15 and above)                                                    |             | 33.5% [96] <sup>f</sup> | 54% [96] <sup>g</sup>   | 56.5% [75] <sup>h</sup> | 62.4% [45] <sup>i</sup> | 67.6% [1] <sup>j</sup> |
| Secondary school enrolment of females (gross %)                                             | 10% [96]    | 11.5% [96]              | 20.4% [96] <sup>k</sup> | 28.8% [96]              | 25.5% [96] <sup>l</sup> | 26.4% [96]             |
| Female Life Expectancy at birth                                                             | 46.1 [96]   | 48.1 [96]               | 46.9 [96]               | 46.5 [96]               | 47.3 [96]               | 50.8 [96] <sup>m</sup> |
| Adult Female Mortality (mortality rate/1000 years exposure)                                 | 2.6 [3]     | 6.5 [3]                 | 11.3 [75]               | 11.6 [45]               | 8.7 [23]                | 8.4 [1]                |
| % of adult female deaths that are maternal <sup>m</sup>                                     |             | 20.8% [3]               | 21.6% [75]              | 17.5% [45]              | 19.1% [23]              | 15.6% [1]              |
| HIV prevalence (adult population, modelled from sentinel surveillance in antenatal clinics) | 0% [98]     | 5% [98]                 | 14% [98]                | 14% [98]                | 13% [98]                | 12% [46]               |
| Short maternal stature (% <145cm tall)                                                      |             | 2.8% [3] <sup>op</sup>  |                         | 3.0% [75] <sup>op</sup> | 3.1% [45] <sup>i</sup>  | 2.4% [1] <sup>pe</sup> |

Formatted Table

<sup>a</sup> Livebirths only<sup>b</sup> Average number of children born to a women during her lifetime<sup>c</sup> Births / number of women aged 15-44<sup>d</sup> Estimate for 2006<sup>e</sup> Estimate for 1980<sup>f</sup> Estimate for 1987<sup>g</sup> Estimate for 1998<sup>h</sup> Estimate for 2000. If women who can only read part of a sentence are excluded then 48.6%<sup>i</sup> Estimate for 2004. If women who can only read part of a sentence are excluded then 53.8%<sup>j</sup> Estimate for 2010. If women who can only read part of a sentence are excluded then 59.4%<sup>k</sup> Estimate for 1996<sup>l</sup> Estimate for 2004<sup>m</sup> Calculated as number of maternal deaths divided by number of adult female deaths given in separate tables in the survey reports<sup>op</sup> Estimate for 1992<sup>oq</sup> Estimate for 2000<sup>pe</sup> Estimate for 2010

## Web Appendix 1 – Estimation of Trend in Maternal Mortality in Malawi from 1977 to 2012

The best-fitting line representing the observed national level MMR data for Malawi was calculated by applying multi-term fractional polynomial transformations to a linear regression of MMR by year using the **fracpoly** command in Stata 13.0 for Mac:

**fracpoly, degree(3) compare: regress mmr year**

The **fracpoly** command transforms the independent variable **year** many times using the powers -2, -1, -.5, 0, 1, 2, 3 in combination. The number of terms used is specified by the **degree()** option. Here we used **3** as that was determined to produce a better fitting model (as assessed by the deviance statistic of the maximum likelihood estimator) than a model with 2 terms and a not statistically significantly different (at  $p < 0.05$ ) fit to a model with 4 terms. The three terms were transformations to the powers -1, 2 and 3 (each with added constants) as this combination was found to produce the best-fitting model.

The subsequent command:

**predict mmrfit**

produces the MMR trend predicted by this best-fitting fractional polynomial model, which was plotted as the gold line in Figure 1 of the paper.

The above calculation of the trend line was based on using the same estimate for each of the years represented by each of the 6 analyses of the 4 nationally representative surveys used (all of the data plotted as larger black dots on Figure 1). We believe this to be more representative than only assuming the survey estimates apply to the mid-points of the period they cover (e.g. for the DHS 2010, which spans 2004-2010, assuming the estimate of 675 only applies to 2007 rather than each of the years 2004 to 2010). Using only the mid-points to calculate the best-fitting fractional polynomial trend-line as a sensitivity analysis results in a fractional polynomial model with two terms with the powers 3 and 3 (each with added constants) and estimates of MMR that show a comparatively flatter trend over the 1990 to 2010 time-period (Web Table 1). We prefer the model using the data applied to all years covered by the survey as this uses more of the information provided by the survey.

**Web Table 1: Results of sensitivity analysis of MMR trend estimate**

| 1990 | 1995 | 2000 | 2005 | 2010 | Source                                                 |
|------|------|------|------|------|--------------------------------------------------------|
| 748  | 916  | 970  | 846  | 484  | Estimates applied to all years covered by survey       |
| 824  | 941  | 933  | 801  | 545  | Estimates applied to mid-points of survey periods only |

## Web Appendix 2 – Estimation of Maternal Mortality due to HIV in Malawi

We used the relative-risk of pregnancy-related mortality in HIV positive compared to HIV negative women estimated by Calvert and Ronsmans via systematic review and meta-analysis to be 7.74 [1], to estimate the proportion of the MMR that is due to HIV depending on the HIV prevalence. We did this using the formula provided by Calvert and Ronsmans [1]:

$$\text{PAF} = \text{hiv} * (\text{RR} - 1) / ((\text{hiv} * (\text{RR} - 1)) + 1)$$

Where: PAF, the Population Attributable Fraction is the proportion of the MMR (Maternal Mortality Ratio) due to HIV; hiv is the HIV prevalence; and RR is the relative-risk of 7.74. The MMR due to HIV is then obtained by multiplying the MMR by the PAF.

We adjusted the proportion of MMR due to HIV downwards from 2003 to 2010 to account for the increasing impact of the antiretroviral therapy (ART) programme in Malawi [2 3]. The effect of the ART programme on MMR due to HIV was estimated as follows. Using the estimate of 35% of HIV positive pregnant women being on ART provided in section 3.2.2 of the Malawi Ministry of Health ART programme report for the second quarter of 2010 [4] and the reported numbers of people on ART in each of the years from 2002 to 2007 provided by Mwangombwa *et al* [2] as an estimate of the exponential expansion path of the ART programme we calculated a percentage of pregnant women on ART for each of the years from 2002 to 2010 (Web Table 2). To fill in the years 2008, 2009 and 2010 we used the **fracpoly** command in Stata 13.0 for Mac (see Web Appendix 1) to estimate the expected number of people on ART given the Mwangombwa *et al* data and applied the 2010 figure (27153) as equalling the 35% of pregnant women on ART in 2010 (Web Table 2).

We then estimated the effectiveness of the ART programme using the ‘current practice’ data from Fasawe *et al* (2013) which accounts for drug stockouts, adherence and drug effectiveness and estimates 18267 pregnant women out of the 59850 initially reached by ART (90% of the estimated 66500 HIV positive pregnant women) would be alive after 10 years. Assuming a proportionally equal year on year decline this translates to 52465 being alive after 1 year (the approximate length of the maternal period of pregnancy and post-partum), i.e. an effectiveness of the ART programme of 87.6%. This could increase to an estimated 96.2% with Option B+ which is currently being rolled-out across Malawi [3].

Finally we applied the estimate of 87.6% effectiveness to the estimates of ART programme coverage for each of the years to arrive at the estimate of the effect of the ART programme on MMR due to HIV (Web Table 2). We then multiplied the MMR due to HIV by 1 minus the effect of the ART programme for the given year to reducing it in line with the effect of the ART programme.



**Web Table 2: Estimation of effect of ART programme on MMR due to HIV**

| Year | Number ever started on ART <sup>a</sup> | % of HIV+ pregnant women on ART, assuming 27153 people in 2010 represents 35% <sup>b</sup> | Estimate of ART programme effect (% reduction) on MMR due to HIV assuming 87.6% effectiveness |
|------|-----------------------------------------|--------------------------------------------------------------------------------------------|-----------------------------------------------------------------------------------------------|
| 2002 | 0                                       | 0%                                                                                         | 0.0%                                                                                          |
| 2003 | 421                                     | 0.5%                                                                                       | 0.5%                                                                                          |
| 2004 | 1550                                    | 2.0%                                                                                       | 1.8%                                                                                          |
| 2005 | 3145                                    | 4.1%                                                                                       | 3.6%                                                                                          |
| 2006 | 6216                                    | 8.0%                                                                                       | 7.0%                                                                                          |
| 2007 | 10215                                   | 13.2%                                                                                      | 11.5%                                                                                         |
| 2008 | 14877                                   | 19.2%                                                                                      | 16.8%                                                                                         |
| 2009 | 20554                                   | 26.5%                                                                                      | 23.2%                                                                                         |
| 2010 | 27153                                   | 35.0%                                                                                      | 30.7%                                                                                         |

<sup>a</sup> 2002 to 2007 numbers taken from the final column of Table 1 of Mwangomba et al [2]. 2008 to 2010 figures estimated using best-fitting trend line determined by fracpoly command in Stata 13.0

<sup>b</sup> The Malawi government report 35% of HIV positive pregnant women were on antiretroviral therapy [4]

### References for Web Appendices 1 and 2

1. Calvert C, Ronsmans C. The contribution of HIV to pregnancy-related mortality: a systematic review and meta-analysis. *AIDS* 2013;**27**:Feb 25 [Epub ahead of print]
2. Mwangomba B, Zachariah R, Massaquoi M, et al. Mortality Reduction Associated with HIV/AIDS Care and Antiretroviral Treatment in Rural Malawi: Evidence from Registers, Coffin Sales and Funerals. *PLoS One* 2010;**5**(5):e10452
3. Fasawe O, Avila C, Shaffer N, et al. Cost-Effectiveness Analysis of Option B+ for HIV Prevention and Treatment of Mothers and Children in Malawi. *PLoS One* 2013;**8**(3):e57778
4. Government of Malawi Ministry of Health. Quarterly HIV Programme Report: April - June 2010. Available at: [http://www.hivunitmohmw.org/uploads/Main/Quarterly\\_HIV\\_Programme\\_Report\\_2010\\_Q2.pdf](http://www.hivunitmohmw.org/uploads/Main/Quarterly_HIV_Programme_Report_2010_Q2.pdf) (accessed 13/08/2013), 2010.

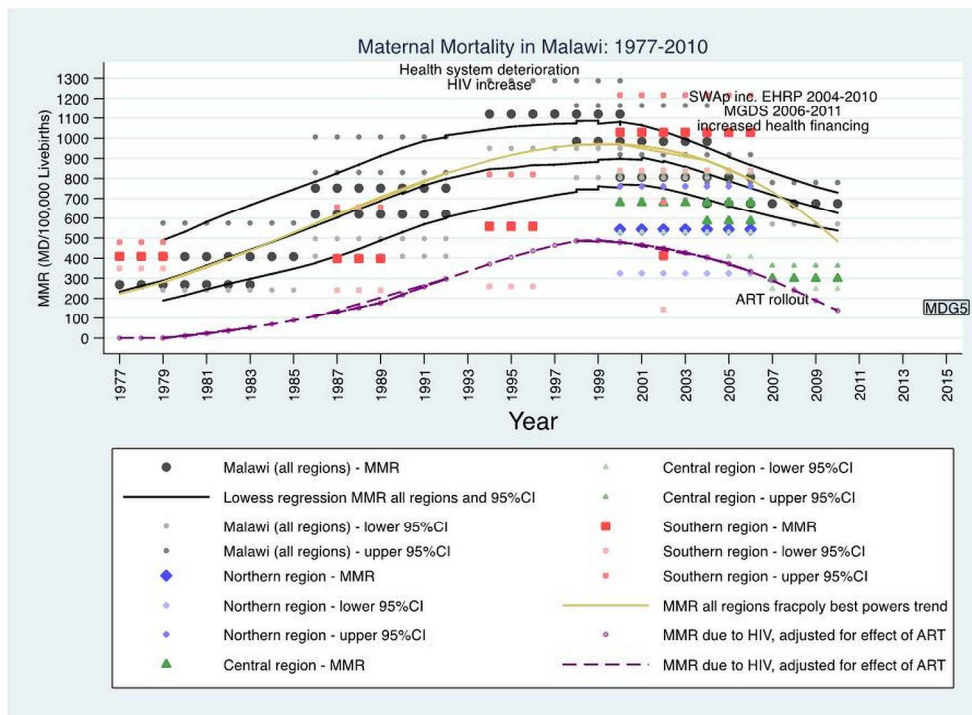

Figure 1: Trends in maternal mortality in Malawi and its Southern, Central and Northern regions, and estimated maternal mortality due to HIV, 1977 to 2010  
242x176mm (300 x 300 DPI)

Review only

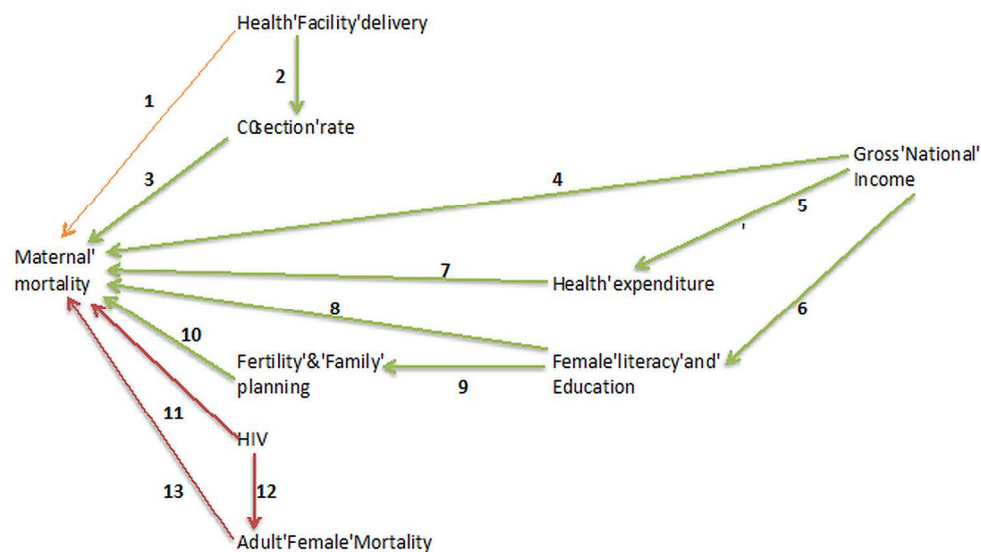

Overview of variables linked to maternal mortality in Malawi. Green arrows show beneficial effects, red arrows negative effects and orange arrows positive and negative effects

1 Increased health facility/delivery could reduce maternal mortality by improving skilled birth attendance, however, overcrowding could reduce quality of care and increase maternal case fatality rates in health facilities

2 Caesarean sections only occur in health facilities and are likely to increase as health facility deliveries increase. If undertaken for life saving purposes such an increase could reduce maternal mortality

3 As the Caesarean section rate increases towards the WHO recommended minimum of 5% of deliveries more women who need emergency C-sections are likely to get them and therefore be more likely to survive severe complications of delivery

4 Large increases in GNI could independently reduce maternal mortality via leading to many improvements in living conditions, as well as via increased health expenditure (5) and increased spending on education leading to improved female literacy and education (6)

7 Increased health expenditure should improve the functioning of the health system leading to reduced maternal mortality via improved quality of antenatal, obstetric and postnatal care

8 Increased female literacy and education should lead to reduced maternal mortality via allowing improved knowledge of maternal health problems, importance of health care and birth preparedness as well as improved family planning and reduced fertility (9)

10 Increases in family planning practices will reduce fertility i.e. reduce exposure to pregnancy and child birth

11 HIV contributes to both indirect and direct maternal mortality and via deaths from AIDS is responsible for a subset of total adult female mortality (12) which can be conflated with maternal mortality (13) if deaths coincidental with pregnancy but not related to it are included

Figure 2: Overview of variables linked to maternal mortality in Malawi
